# Supplementary material for: Research on Feature Extracted Method for Flutter Test Based on EMD and CNN
Source: Hindawi journal article supplement (doi:10.1155/2021/6620368), 2021-02-27
Supplement: f1 [file 6620368.f1.zip]

Archive with 10 entries (10 files):
- data-10-no-flutter.docx
- data-1-no-flutter.docx
- data-2-no-flutter.docx
- data-3-no-flutter.docx
- data-4-no-flutter.docx
- data-5-no-flutter.docx
- data-6-no-flutter.docx
- data-7-no-flutter.docx
- data-8-no-flutter.docx
- data-9-no-flutter.docx
