# Supplementary material for: Research on Feature Extracted Method for Flutter Test Based on EMD and CNN
Source: Hindawi journal article supplement (doi:10.1155/2021/6620368), 2021-02-27
Supplement: f1 [file 6620368.f1.zip › data-1-no-flutter.docx]

| Imf1 | Imf2 | Imf3 | Imf4 | Imf5 | Imf6 | Imf7 | Imf8 |
| --- | --- | --- | --- | --- | --- | --- | --- |
| -1.00E-03 | -6.22E-02 | 2.06E+00 | -5.84E-01 | -1.24E+00 | 4.05E-01 | 1.40E-01 | -8.72E-02 |
| -6.54E-02 | 4.51E-02 | 2.41E+00 | -5.76E-01 | -1.24E+00 | 4.07E-01 | 1.41E-01 | -8.72E-02 |
| 9.03E-02 | -2.41E-02 | 2.71E+00 | -5.68E-01 | -1.24E+00 | 4.09E-01 | 1.42E-01 | -8.72E-02 |
| -1.01E-01 | -3.83E-02 | 2.91E+00 | -5.58E-01 | -1.24E+00 | 4.11E-01 | 1.42E-01 | -8.72E-02 |
| -2.41E-01 | 2.98E-02 | 2.96E+00 | -5.46E-01 | -1.24E+00 | 4.12E-01 | 1.43E-01 | -8.72E-02 |
| 1.41E-01 | 1.12E-01 | 2.88E+00 | -5.34E-01 | -1.23E+00 | 4.14E-01 | 1.43E-01 | -8.72E-02 |
| 3.61E-01 | 7.59E-02 | 2.68E+00 | -5.19E-01 | -1.23E+00 | 4.15E-01 | 1.44E-01 | -8.72E-02 |
| -3.56E-01 | -1.46E-01 | 2.39E+00 | -5.04E-01 | -1.23E+00 | 4.17E-01 | 1.44E-01 | -8.72E-02 |
| -3.29E-01 | -2.74E-01 | 2.07E+00 | -4.87E-01 | -1.22E+00 | 4.19E-01 | 1.45E-01 | -8.72E-02 |
| 2.35E-01 | -1.38E-01 | 1.74E+00 | -4.68E-01 | -1.22E+00 | 4.20E-01 | 1.45E-01 | -8.72E-02 |
| -1.66E-01 | 1.39E-01 | 1.44E+00 | -4.49E-01 | -1.21E+00 | 4.22E-01 | 1.46E-01 | -8.72E-02 |
| -6.73E-02 | 2.90E-01 | 1.16E+00 | -4.28E-01 | -1.21E+00 | 4.23E-01 | 1.46E-01 | -8.72E-02 |
| 1.03E-01 | 3.36E-01 | 9.13E-01 | -4.06E-01 | -1.20E+00 | 4.24E-01 | 1.47E-01 | -8.71E-02 |
| -1.16E-01 | 3.36E-01 | 6.97E-01 | -3.83E-01 | -1.19E+00 | 4.26E-01 | 1.47E-01 | -8.71E-02 |
| 1.83E-01 | 1.96E-01 | 5.04E-01 | -3.59E-01 | -1.18E+00 | 4.27E-01 | 1.47E-01 | -8.71E-02 |
| 1.94E-01 | -6.99E-02 | 3.20E-01 | -3.33E-01 | -1.18E+00 | 4.28E-01 | 1.48E-01 | -8.71E-02 |
| -2.29E-01 | -2.98E-01 | 1.31E-01 | -3.07E-01 | -1.17E+00 | 4.30E-01 | 1.48E-01 | -8.71E-02 |
| -9.86E-02 | -2.60E-01 | -7.63E-02 | -2.80E-01 | -1.16E+00 | 4.31E-01 | 1.48E-01 | -8.70E-02 |
| 2.48E-01 | -2.46E-02 | -2.96E-01 | -2.52E-01 | -1.15E+00 | 4.32E-01 | 1.48E-01 | -8.70E-02 |
| -2.32E-01 | 2.34E-01 | -5.18E-01 | -2.23E-01 | -1.13E+00 | 4.33E-01 | 1.48E-01 | -8.70E-02 |
| -1.40E-01 | 3.13E-01 | -7.31E-01 | -1.93E-01 | -1.12E+00 | 4.34E-01 | 1.48E-01 | -8.70E-02 |
| 1.36E-01 | 1.93E-01 | -9.31E-01 | -1.62E-01 | -1.11E+00 | 4.35E-01 | 1.49E-01 | -8.69E-02 |
| 1.38E-01 | -7.29E-02 | -1.11E+00 | -1.31E-01 | -1.10E+00 | 4.36E-01 | 1.49E-01 | -8.69E-02 |
| 1.21E-01 | -3.37E-01 | -1.28E+00 | -9.85E-02 | -1.09E+00 | 4.37E-01 | 1.49E-01 | -8.69E-02 |
| -1.07E-01 | -4.11E-01 | -1.43E+00 | -6.57E-02 | -1.07E+00 | 4.38E-01 | 1.49E-01 | -8.69E-02 |
| 1.31E-01 | -1.65E-01 | -1.56E+00 | -3.24E-02 | -1.06E+00 | 4.39E-01 | 1.49E-01 | -8.68E-02 |
| -2.02E-01 | 2.35E-01 | -1.67E+00 | 1.61E-03 | -1.05E+00 | 4.39E-01 | 1.49E-01 | -8.68E-02 |
| 3.11E-02 | 4.66E-01 | -1.78E+00 | 3.61E-02 | -1.03E+00 | 4.40E-01 | 1.49E-01 | -8.68E-02 |
| 4.71E-01 | 4.90E-01 | -1.90E+00 | 7.11E-02 | -1.02E+00 | 4.41E-01 | 1.48E-01 | -8.67E-02 |
| -1.47E-01 | 3.72E-01 | -2.02E+00 | 1.06E-01 | -1.00E+00 | 4.41E-01 | 1.48E-01 | -8.67E-02 |
| -7.45E-01 | 2.34E-01 | -2.13E+00 | 1.42E-01 | -9.88E-01 | 4.42E-01 | 1.48E-01 | -8.67E-02 |
| -2.29E-01 | 1.79E-01 | -2.24E+00 | 1.78E-01 | -9.73E-01 | 4.42E-01 | 1.48E-01 | -8.66E-02 |
| 2.19E-01 | 1.75E-01 | -2.34E+00 | 2.15E-01 | -9.57E-01 | 4.43E-01 | 1.48E-01 | -8.66E-02 |
| 6.55E-01 | 1.56E-01 | -2.41E+00 | 2.52E-01 | -9.42E-01 | 4.43E-01 | 1.47E-01 | -8.65E-02 |
| 7.30E-01 | 6.42E-02 | -2.44E+00 | 2.89E-01 | -9.26E-01 | 4.43E-01 | 1.47E-01 | -8.65E-02 |
| 4.46E-01 | -1.13E-01 | -2.44E+00 | 3.26E-01 | -9.10E-01 | 4.43E-01 | 1.47E-01 | -8.64E-02 |
| 1.29E-01 | -3.08E-01 | -2.38E+00 | 3.63E-01 | -8.94E-01 | 4.44E-01 | 1.46E-01 | -8.64E-02 |
| 8.92E-02 | -4.35E-01 | -2.26E+00 | 4.00E-01 | -8.77E-01 | 4.44E-01 | 1.46E-01 | -8.64E-02 |
| -1.67E-01 | -4.00E-01 | -2.10E+00 | 4.37E-01 | -8.61E-01 | 4.43E-01 | 1.45E-01 | -8.63E-02 |
| 1.13E-01 | -1.39E-01 | -1.88E+00 | 4.72E-01 | -8.44E-01 | 4.43E-01 | 1.45E-01 | -8.63E-02 |
| -1.42E-01 | 2.30E-01 | -1.65E+00 | 5.07E-01 | -8.28E-01 | 4.43E-01 | 1.44E-01 | -8.62E-02 |
| 2.18E-01 | 3.79E-01 | -1.40E+00 | 5.41E-01 | -8.11E-01 | 4.43E-01 | 1.44E-01 | -8.62E-02 |
| -2.64E-01 | 1.72E-01 | -1.16E+00 | 5.73E-01 | -7.95E-01 | 4.42E-01 | 1.43E-01 | -8.61E-02 |
| -1.84E-01 | -1.66E-01 | -9.51E-01 | 6.04E-01 | -7.78E-01 | 4.42E-01 | 1.43E-01 | -8.61E-02 |
| 2.04E-01 | -3.65E-01 | -7.82E-01 | 6.33E-01 | -7.62E-01 | 4.41E-01 | 1.42E-01 | -8.60E-02 |
| -1.59E-01 | -1.65E-01 | -6.61E-01 | 6.59E-01 | -7.45E-01 | 4.41E-01 | 1.41E-01 | -8.59E-02 |
| 1.38E-01 | 2.17E-01 | -5.75E-01 | 6.83E-01 | -7.29E-01 | 4.40E-01 | 1.41E-01 | -8.59E-02 |
| -1.43E-01 | 3.88E-01 | -5.01E-01 | 7.05E-01 | -7.12E-01 | 4.39E-01 | 1.40E-01 | -8.58E-02 |
| -1.55E-01 | 2.89E-01 | -4.24E-01 | 7.24E-01 | -6.96E-01 | 4.38E-01 | 1.39E-01 | -8.58E-02 |
| 2.30E-02 | -8.61E-03 | -3.35E-01 | 7.40E-01 | -6.80E-01 | 4.37E-01 | 1.38E-01 | -8.57E-02 |
| 1.97E-01 | -3.15E-01 | -2.29E-01 | 7.53E-01 | -6.64E-01 | 4.36E-01 | 1.37E-01 | -8.56E-02 |
| -2.22E-01 | -4.49E-01 | -1.01E-01 | 7.62E-01 | -6.48E-01 | 4.35E-01 | 1.37E-01 | -8.56E-02 |
| -8.87E-02 | -3.46E-01 | 4.56E-02 | 7.67E-01 | -6.32E-01 | 4.34E-01 | 1.36E-01 | -8.55E-02 |
| 2.63E-01 | -6.30E-02 | 2.01E-01 | 7.68E-01 | -6.17E-01 | 4.32E-01 | 1.35E-01 | -8.55E-02 |
| -2.53E-01 | 2.92E-01 | 3.52E-01 | 7.65E-01 | -6.02E-01 | 4.31E-01 | 1.34E-01 | -8.54E-02 |
| 2.12E-01 | 4.91E-01 | 4.86E-01 | 7.58E-01 | -5.86E-01 | 4.29E-01 | 1.33E-01 | -8.53E-02 |
| -1.50E-01 | 3.43E-01 | 5.94E-01 | 7.45E-01 | -5.71E-01 | 4.27E-01 | 1.32E-01 | -8.53E-02 |
| 9.31E-02 | 1.83E-02 | 6.81E-01 | 7.28E-01 | -5.56E-01 | 4.26E-01 | 1.31E-01 | -8.52E-02 |
| -6.70E-02 | -2.88E-01 | 7.56E-01 | 7.05E-01 | -5.41E-01 | 4.24E-01 | 1.30E-01 | -8.51E-02 |
| 8.01E-02 | -4.89E-01 | 8.27E-01 | 6.76E-01 | -5.26E-01 | 4.21E-01 | 1.29E-01 | -8.50E-02 |
| -9.96E-02 | -3.60E-01 | 9.01E-01 | 6.41E-01 | -5.10E-01 | 4.19E-01 | 1.28E-01 | -8.50E-02 |
| -1.68E-01 | 6.81E-02 | 9.72E-01 | 5.99E-01 | -4.95E-01 | 4.17E-01 | 1.27E-01 | -8.49E-02 |
| 1.99E-01 | 4.77E-01 | 1.04E+00 | 5.51E-01 | -4.79E-01 | 4.14E-01 | 1.25E-01 | -8.48E-02 |
| -2.04E-01 | 4.72E-01 | 1.09E+00 | 4.96E-01 | -4.63E-01 | 4.12E-01 | 1.24E-01 | -8.48E-02 |
| 1.88E-01 | 1.03E-01 | 1.11E+00 | 4.35E-01 | -4.47E-01 | 4.09E-01 | 1.23E-01 | -8.47E-02 |
| -1.66E-01 | -2.87E-01 | 1.11E+00 | 3.67E-01 | -4.31E-01 | 4.06E-01 | 1.22E-01 | -8.46E-02 |
| 1.50E-01 | -4.97E-01 | 1.06E+00 | 2.93E-01 | -4.14E-01 | 4.03E-01 | 1.21E-01 | -8.45E-02 |
| -1.37E-01 | -4.57E-01 | 9.72E-01 | 2.15E-01 | -3.97E-01 | 4.00E-01 | 1.19E-01 | -8.44E-02 |
| 1.30E-01 | -1.36E-01 | 8.55E-01 | 1.34E-01 | -3.80E-01 | 3.97E-01 | 1.18E-01 | -8.44E-02 |
| -1.42E-01 | 3.28E-01 | 7.33E-01 | 5.14E-02 | -3.62E-01 | 3.94E-01 | 1.17E-01 | -8.43E-02 |
| 1.91E-01 | 5.70E-01 | 6.30E-01 | -3.27E-02 | -3.44E-01 | 3.90E-01 | 1.15E-01 | -8.42E-02 |
| -2.61E-01 | 3.54E-01 | 5.65E-01 | -1.17E-01 | -3.26E-01 | 3.87E-01 | 1.14E-01 | -8.41E-02 |
| 3.12E-01 | -1.15E-01 | 5.30E-01 | -2.00E-01 | -3.07E-01 | 3.83E-01 | 1.13E-01 | -8.40E-02 |
| 3.46E-01 | -4.68E-01 | 5.13E-01 | -2.80E-01 | -2.87E-01 | 3.79E-01 | 1.11E-01 | -8.39E-02 |
| 1.83E-01 | -6.34E-01 | 5.02E-01 | -3.58E-01 | -2.67E-01 | 3.75E-01 | 1.10E-01 | -8.39E-02 |
| -2.72E-01 | -5.05E-01 | 4.84E-01 | -4.30E-01 | -2.47E-01 | 3.71E-01 | 1.08E-01 | -8.38E-02 |
| -2.56E-01 | -2.45E-02 | 4.41E-01 | -4.98E-01 | -2.25E-01 | 3.66E-01 | 1.07E-01 | -8.37E-02 |
| 1.58E-01 | 4.94E-01 | 3.58E-01 | -5.58E-01 | -2.04E-01 | 3.62E-01 | 1.05E-01 | -8.36E-02 |
| -1.57E-01 | 5.85E-01 | 2.17E-01 | -6.11E-01 | -1.81E-01 | 3.57E-01 | 1.04E-01 | -8.35E-02 |
| 2.00E-01 | 5.00E-02 | 1.95E-02 | -6.55E-01 | -1.58E-01 | 3.52E-01 | 1.02E-01 | -8.34E-02 |
| -2.45E-01 | -4.98E-01 | -1.76E-01 | -6.89E-01 | -1.34E-01 | 3.47E-01 | 1.01E-01 | -8.33E-02 |
| 2.25E-01 | -4.29E-01 | -3.08E-01 | -7.13E-01 | -1.10E-01 | 3.42E-01 | 9.92E-02 | -8.32E-02 |
| 2.25E-01 | 5.35E-04 | -3.43E-01 | -7.24E-01 | -8.43E-02 | 3.37E-01 | 9.77E-02 | -8.31E-02 |
| -1.80E-01 | 3.24E-01 | -2.84E-01 | -7.21E-01 | -5.81E-02 | 3.31E-01 | 9.61E-02 | -8.30E-02 |
| 1.60E-01 | 2.11E-01 | -1.44E-01 | -7.06E-01 | -3.12E-02 | 3.25E-01 | 9.44E-02 | -8.29E-02 |
| -2.02E-01 | -4.42E-02 | 2.20E-02 | -6.76E-01 | -3.52E-03 | 3.20E-01 | 9.28E-02 | -8.28E-02 |
| -2.55E-01 | -1.82E-01 | 1.48E-01 | -6.32E-01 | 2.48E-02 | 3.14E-01 | 9.11E-02 | -8.27E-02 |
| 3.32E-01 | -9.27E-02 | 1.96E-01 | -5.74E-01 | 5.36E-02 | 3.07E-01 | 8.95E-02 | -8.26E-02 |
| -2.89E-01 | 4.79E-02 | 1.80E-01 | -5.00E-01 | 8.30E-02 | 3.01E-01 | 8.78E-02 | -8.25E-02 |
| -4.28E-01 | 1.34E-01 | 1.24E-01 | -4.13E-01 | 1.13E-01 | 2.95E-01 | 8.60E-02 | -8.24E-02 |
| -5.68E-02 | 1.15E-01 | 5.41E-02 | -3.16E-01 | 1.43E-01 | 2.88E-01 | 8.43E-02 | -8.23E-02 |
| 3.96E-01 | 5.93E-03 | -1.39E-02 | -2.11E-01 | 1.73E-01 | 2.81E-01 | 8.26E-02 | -8.22E-02 |
| -3.42E-01 | -1.41E-01 | -6.52E-02 | -1.01E-01 | 2.04E-01 | 2.74E-01 | 8.08E-02 | -8.21E-02 |
| 1.10E-02 | -2.04E-01 | -8.57E-02 | 1.04E-02 | 2.34E-01 | 2.67E-01 | 7.90E-02 | -8.20E-02 |
| 2.06E-01 | -1.45E-01 | -6.99E-02 | 1.21E-01 | 2.65E-01 | 2.59E-01 | 7.73E-02 | -8.19E-02 |
| -1.41E-01 | 3.38E-02 | -3.05E-02 | 2.28E-01 | 2.95E-01 | 2.52E-01 | 7.55E-02 | -8.18E-02 |
| -9.12E-02 | 2.19E-01 | 1.51E-02 | 3.29E-01 | 3.26E-01 | 2.44E-01 | 7.36E-02 | -8.17E-02 |
| 5.14E-02 | 3.31E-01 | 4.98E-02 | 4.21E-01 | 3.56E-01 | 2.36E-01 | 7.18E-02 | -8.16E-02 |
| -4.08E-02 | 3.13E-01 | 5.96E-02 | 5.02E-01 | 3.86E-01 | 2.28E-01 | 7.00E-02 | -8.15E-02 |
| 5.88E-02 | 1.42E-01 | 4.47E-02 | 5.68E-01 | 4.16E-01 | 2.19E-01 | 6.81E-02 | -8.14E-02 |
| -1.02E-01 | -1.38E-01 | 1.33E-02 | 6.20E-01 | 4.45E-01 | 2.11E-01 | 6.62E-02 | -8.13E-02 |
| 1.60E-01 | -4.15E-01 | -2.53E-02 | 6.55E-01 | 4.73E-01 | 2.02E-01 | 6.44E-02 | -8.12E-02 |
| -2.18E-01 | -4.37E-01 | -6.35E-02 | 6.74E-01 | 5.01E-01 | 1.93E-01 | 6.25E-02 | -8.11E-02 |
| 2.66E-01 | -1.07E-01 | -9.36E-02 | 6.78E-01 | 5.29E-01 | 1.84E-01 | 6.06E-02 | -8.09E-02 |
| 2.80E-01 | 2.91E-01 | -1.08E-01 | 6.67E-01 | 5.55E-01 | 1.74E-01 | 5.86E-02 | -8.08E-02 |
| -2.71E-01 | 4.44E-01 | -1.00E-01 | 6.42E-01 | 5.81E-01 | 1.65E-01 | 5.67E-02 | -8.07E-02 |
| 2.40E-01 | 3.25E-01 | -6.56E-02 | 6.04E-01 | 6.05E-01 | 1.55E-01 | 5.48E-02 | -8.06E-02 |
| 3.44E-02 | 1.11E-01 | -9.83E-03 | 5.54E-01 | 6.29E-01 | 1.45E-01 | 5.28E-02 | -8.05E-02 |
| -1.54E-01 | -1.22E-01 | 5.84E-02 | 4.95E-01 | 6.52E-01 | 1.34E-01 | 5.08E-02 | -8.04E-02 |
| 2.87E-02 | -3.20E-01 | 1.30E-01 | 4.29E-01 | 6.73E-01 | 1.24E-01 | 4.89E-02 | -8.02E-02 |
| 8.55E-02 | -3.81E-01 | 1.98E-01 | 3.58E-01 | 6.93E-01 | 1.13E-01 | 4.69E-02 | -8.01E-02 |
| -6.40E-02 | -2.16E-01 | 2.51E-01 | 2.84E-01 | 7.12E-01 | 1.02E-01 | 4.49E-02 | -8.00E-02 |
| 5.90E-02 | 1.05E-01 | 2.79E-01 | 2.08E-01 | 7.30E-01 | 9.13E-02 | 4.29E-02 | -7.99E-02 |
| -8.14E-02 | 3.25E-01 | 2.72E-01 | 1.33E-01 | 7.46E-01 | 8.00E-02 | 4.09E-02 | -7.98E-02 |
| 1.29E-01 | 2.38E-01 | 2.21E-01 | 5.88E-02 | 7.60E-01 | 6.84E-02 | 3.89E-02 | -7.96E-02 |
| -2.17E-01 | -6.05E-02 | 1.36E-01 | -1.45E-02 | 7.74E-01 | 5.66E-02 | 3.68E-02 | -7.95E-02 |
| -2.22E-01 | -2.74E-01 | 2.67E-02 | -8.62E-02 | 7.85E-01 | 4.46E-02 | 3.48E-02 | -7.94E-02 |
| -1.30E-01 | -1.71E-01 | -9.48E-02 | -1.56E-01 | 7.95E-01 | 3.24E-02 | 3.28E-02 | -7.93E-02 |
| 2.07E-01 | 8.69E-02 | -2.15E-01 | -2.23E-01 | 8.03E-01 | 2.00E-02 | 3.07E-02 | -7.92E-02 |
| -1.65E-01 | 2.34E-01 | -3.19E-01 | -2.87E-01 | 8.10E-01 | 7.35E-03 | 2.86E-02 | -7.90E-02 |
| 1.29E-01 | 9.34E-02 | -4.02E-01 | -3.47E-01 | 8.14E-01 | -5.44E-03 | 2.66E-02 | -7.89E-02 |
| 7.50E-02 | -1.20E-01 | -4.68E-01 | -4.04E-01 | 8.17E-01 | -1.84E-02 | 2.45E-02 | -7.88E-02 |
| -1.17E-01 | -2.09E-01 | -5.22E-01 | -4.56E-01 | 8.17E-01 | -3.15E-02 | 2.24E-02 | -7.86E-02 |
| -1.42E-01 | -7.03E-02 | -5.72E-01 | -5.03E-01 | 8.16E-01 | -4.47E-02 | 2.04E-02 | -7.85E-02 |
| 1.70E-01 | 1.28E-01 | -6.20E-01 | -5.45E-01 | 8.12E-01 | -5.81E-02 | 1.83E-02 | -7.84E-02 |
| -1.95E-01 | 2.01E-01 | -6.71E-01 | -5.81E-01 | 8.06E-01 | -7.15E-02 | 1.62E-02 | -7.83E-02 |
| -9.80E-03 | 1.22E-01 | -7.24E-01 | -6.11E-01 | 7.97E-01 | -8.50E-02 | 1.41E-02 | -7.81E-02 |
| 2.27E-01 | -1.21E-02 | -7.77E-01 | -6.34E-01 | 7.86E-01 | -9.86E-02 | 1.20E-02 | -7.80E-02 |
| 1.45E-02 | -1.10E-01 | -8.23E-01 | -6.50E-01 | 7.73E-01 | -1.12E-01 | 9.87E-03 | -7.79E-02 |
| -2.47E-01 | -1.75E-01 | -8.60E-01 | -6.58E-01 | 7.57E-01 | -1.26E-01 | 7.76E-03 | -7.77E-02 |
| 2.53E-01 | -2.18E-01 | -8.80E-01 | -6.59E-01 | 7.38E-01 | -1.39E-01 | 5.65E-03 | -7.76E-02 |
| -1.34E-01 | -2.03E-01 | -8.82E-01 | -6.51E-01 | 7.17E-01 | -1.53E-01 | 3.53E-03 | -7.75E-02 |
| -2.37E-01 | -9.49E-02 | -8.63E-01 | -6.35E-01 | 6.93E-01 | -1.66E-01 | 1.42E-03 | -7.73E-02 |
| -5.14E-02 | 1.02E-01 | -8.25E-01 | -6.12E-01 | 6.67E-01 | -1.80E-01 | -7.05E-04 | -7.72E-02 |
| 1.65E-01 | 2.47E-01 | -7.69E-01 | -5.82E-01 | 6.38E-01 | -1.93E-01 | -2.83E-03 | -7.71E-02 |
| 1.59E-01 | 1.90E-01 | -6.98E-01 | -5.45E-01 | 6.07E-01 | -2.06E-01 | -4.95E-03 | -7.69E-02 |
| -7.57E-02 | -5.41E-02 | -6.15E-01 | -5.03E-01 | 5.75E-01 | -2.20E-01 | -7.08E-03 | -7.68E-02 |
| 5.46E-02 | -2.71E-01 | -5.27E-01 | -4.56E-01 | 5.40E-01 | -2.32E-01 | -9.20E-03 | -7.67E-02 |
| -6.40E-02 | -2.41E-01 | -4.39E-01 | -4.03E-01 | 5.04E-01 | -2.45E-01 | -1.13E-02 | -7.65E-02 |
| 1.02E-01 | -9.66E-02 | -3.52E-01 | -3.47E-01 | 4.66E-01 | -2.58E-01 | -1.35E-02 | -7.64E-02 |
| -1.54E-01 | 6.89E-02 | -2.66E-01 | -2.88E-01 | 4.27E-01 | -2.70E-01 | -1.56E-02 | -7.62E-02 |
| -3.14E-03 | 2.29E-01 | -1.84E-01 | -2.26E-01 | 3.87E-01 | -2.82E-01 | -1.77E-02 | -7.61E-02 |
| 2.27E-01 | 3.13E-01 | -1.04E-01 | -1.62E-01 | 3.46E-01 | -2.94E-01 | -1.98E-02 | -7.60E-02 |
| -2.21E-01 | 2.73E-01 | -2.81E-02 | -9.64E-02 | 3.04E-01 | -3.06E-01 | -2.20E-02 | -7.58E-02 |
| 1.86E-01 | 1.82E-01 | 4.68E-02 | -3.02E-02 | 2.61E-01 | -3.17E-01 | -2.41E-02 | -7.57E-02 |
| -1.35E-01 | 1.52E-02 | 1.23E-01 | 3.61E-02 | 2.19E-01 | -3.28E-01 | -2.62E-02 | -7.55E-02 |
| 8.32E-04 | -2.11E-01 | 2.02E-01 | 1.02E-01 | 1.76E-01 | -3.39E-01 | -2.83E-02 | -7.54E-02 |
| 5.72E-02 | -3.63E-01 | 2.88E-01 | 1.66E-01 | 1.33E-01 | -3.49E-01 | -3.05E-02 | -7.52E-02 |
| -5.54E-02 | -3.53E-01 | 3.83E-01 | 2.29E-01 | 9.04E-02 | -3.59E-01 | -3.26E-02 | -7.51E-02 |
| 9.16E-02 | -2.09E-01 | 4.88E-01 | 2.89E-01 | 4.83E-02 | -3.69E-01 | -3.47E-02 | -7.50E-02 |
| 1.45E-01 | 2.24E-02 | 6.00E-01 | 3.46E-01 | 6.82E-03 | -3.78E-01 | -3.68E-02 | -7.48E-02 |
| -2.27E-01 | 2.75E-01 | 7.18E-01 | 3.99E-01 | -3.38E-02 | -3.86E-01 | -3.89E-02 | -7.47E-02 |
| 3.21E-01 | 4.12E-01 | 8.39E-01 | 4.48E-01 | -7.33E-02 | -3.95E-01 | -4.10E-02 | -7.45E-02 |
| -1.56E-01 | 3.70E-01 | 9.59E-01 | 4.92E-01 | -1.12E-01 | -4.03E-01 | -4.31E-02 | -7.44E-02 |
| -5.07E-01 | 2.14E-01 | 1.07E+00 | 5.30E-01 | -1.49E-01 | -4.10E-01 | -4.52E-02 | -7.42E-02 |
| -4.07E-01 | 2.18E-02 | 1.18E+00 | 5.62E-01 | -1.84E-01 | -4.17E-01 | -4.73E-02 | -7.41E-02 |
| -2.89E-01 | -1.66E-01 | 1.26E+00 | 5.87E-01 | -2.18E-01 | -4.23E-01 | -4.94E-02 | -7.39E-02 |
| 6.23E-01 | -3.19E-01 | 1.33E+00 | 6.04E-01 | -2.50E-01 | -4.28E-01 | -5.15E-02 | -7.38E-02 |
| 7.06E-01 | -4.15E-01 | 1.37E+00 | 6.14E-01 | -2.80E-01 | -4.34E-01 | -5.35E-02 | -7.36E-02 |
| 7.49E-01 | -4.33E-01 | 1.38E+00 | 6.15E-01 | -3.09E-01 | -4.38E-01 | -5.56E-02 | -7.35E-02 |
| 3.47E-01 | -3.68E-01 | 1.35E+00 | 6.09E-01 | -3.35E-01 | -4.42E-01 | -5.77E-02 | -7.33E-02 |
| -8.61E-02 | -2.32E-01 | 1.29E+00 | 5.94E-01 | -3.60E-01 | -4.45E-01 | -5.97E-02 | -7.32E-02 |
| -5.38E-01 | -4.35E-02 | 1.20E+00 | 5.73E-01 | -3.82E-01 | -4.48E-01 | -6.18E-02 | -7.30E-02 |
| -5.90E-01 | 1.74E-01 | 1.09E+00 | 5.46E-01 | -4.03E-01 | -4.50E-01 | -6.38E-02 | -7.29E-02 |
| 2.11E-01 | 3.62E-01 | 9.59E-01 | 5.12E-01 | -4.21E-01 | -4.51E-01 | -6.59E-02 | -7.27E-02 |
| 4.07E-01 | 3.63E-01 | 8.18E-01 | 4.74E-01 | -4.37E-01 | -4.51E-01 | -6.79E-02 | -7.26E-02 |
| -3.08E-01 | 7.06E-02 | 6.78E-01 | 4.31E-01 | -4.52E-01 | -4.51E-01 | -6.99E-02 | -7.24E-02 |
| 2.20E-01 | -2.73E-01 | 5.52E-01 | 3.85E-01 | -4.63E-01 | -4.50E-01 | -7.19E-02 | -7.23E-02 |
| 2.78E-04 | -2.96E-01 | 4.53E-01 | 3.35E-01 | -4.73E-01 | -4.48E-01 | -7.39E-02 | -7.21E-02 |
| -1.24E-01 | -4.42E-02 | 3.84E-01 | 2.83E-01 | -4.80E-01 | -4.46E-01 | -7.59E-02 | -7.19E-02 |
| 1.28E-01 | 2.18E-01 | 3.30E-01 | 2.29E-01 | -4.85E-01 | -4.42E-01 | -7.79E-02 | -7.18E-02 |
| -1.64E-01 | 2.23E-01 | 2.70E-01 | 1.74E-01 | -4.88E-01 | -4.38E-01 | -7.99E-02 | -7.16E-02 |
| 2.18E-01 | -2.33E-02 | 1.87E-01 | 1.18E-01 | -4.88E-01 | -4.33E-01 | -8.18E-02 | -7.15E-02 |
| -2.65E-01 | -1.83E-01 | 7.47E-02 | 6.21E-02 | -4.86E-01 | -4.27E-01 | -8.38E-02 | -7.13E-02 |
| 2.87E-01 | -1.50E-01 | -6.26E-02 | 6.79E-03 | -4.81E-01 | -4.20E-01 | -8.57E-02 | -7.12E-02 |
| 3.77E-02 | -1.23E-01 | -2.02E-01 | -4.72E-02 | -4.73E-01 | -4.12E-01 | -8.76E-02 | -7.10E-02 |
| -2.43E-01 | -7.55E-02 | -3.36E-01 | -9.94E-02 | -4.63E-01 | -4.04E-01 | -8.95E-02 | -7.08E-02 |
| 1.92E-01 | 5.14E-02 | -4.67E-01 | -1.49E-01 | -4.50E-01 | -3.95E-01 | -9.14E-02 | -7.07E-02 |
| -1.39E-01 | 1.30E-01 | -5.94E-01 | -1.95E-01 | -4.34E-01 | -3.85E-01 | -9.33E-02 | -7.05E-02 |
| 9.71E-02 | 3.00E-02 | -7.16E-01 | -2.38E-01 | -4.15E-01 | -3.74E-01 | -9.52E-02 | -7.04E-02 |
| -7.06E-02 | -9.16E-02 | -8.22E-01 | -2.76E-01 | -3.93E-01 | -3.62E-01 | -9.70E-02 | -7.02E-02 |
| 4.06E-02 | -1.27E-01 | -9.00E-01 | -3.10E-01 | -3.67E-01 | -3.50E-01 | -9.89E-02 | -7.01E-02 |
| 5.79E-02 | -1.18E-01 | -9.39E-01 | -3.37E-01 | -3.39E-01 | -3.37E-01 | -1.01E-01 | -6.99E-02 |
| 2.53E-02 | -1.07E-01 | -9.40E-01 | -3.58E-01 | -3.08E-01 | -3.24E-01 | -1.02E-01 | -6.97E-02 |
| -8.35E-02 | -6.25E-02 | -9.09E-01 | -3.72E-01 | -2.73E-01 | -3.09E-01 | -1.04E-01 | -6.96E-02 |
| 1.07E-01 | 5.09E-02 | -8.53E-01 | -3.80E-01 | -2.36E-01 | -2.94E-01 | -1.06E-01 | -6.94E-02 |
| -1.35E-01 | 1.68E-01 | -7.79E-01 | -3.82E-01 | -1.97E-01 | -2.79E-01 | -1.08E-01 | -6.92E-02 |
| 1.61E-01 | 1.31E-01 | -6.95E-01 | -3.79E-01 | -1.55E-01 | -2.63E-01 | -1.09E-01 | -6.91E-02 |
| 1.83E-01 | -4.79E-02 | -6.04E-01 | -3.71E-01 | -1.12E-01 | -2.47E-01 | -1.11E-01 | -6.89E-02 |
| -1.95E-01 | -2.33E-01 | -5.14E-01 | -3.60E-01 | -6.83E-02 | -2.29E-01 | -1.13E-01 | -6.88E-02 |
| 5.88E-02 | -2.42E-01 | -4.33E-01 | -3.44E-01 | -2.39E-02 | -2.12E-01 | -1.15E-01 | -6.86E-02 |
| 1.67E-01 | -9.36E-02 | -3.67E-01 | -3.25E-01 | 2.05E-02 | -1.94E-01 | -1.16E-01 | -6.84E-02 |
| 2.08E-01 | 1.27E-01 | -3.09E-01 | -3.03E-01 | 6.43E-02 | -1.75E-01 | -1.18E-01 | -6.83E-02 |
| -1.23E-01 | 3.13E-01 | -2.50E-01 | -2.78E-01 | 1.07E-01 | -1.56E-01 | -1.19E-01 | -6.81E-02 |
| -2.55E-01 | 2.90E-01 | -1.80E-01 | -2.51E-01 | 1.48E-01 | -1.37E-01 | -1.21E-01 | -6.79E-02 |
| 3.02E-01 | -2.99E-02 | -1.02E-01 | -2.22E-01 | 1.87E-01 | -1.17E-01 | -1.23E-01 | -6.78E-02 |
| -3.55E-01 | -3.46E-01 | -1.75E-02 | -1.92E-01 | 2.24E-01 | -9.74E-02 | -1.24E-01 | -6.76E-02 |
| -7.87E-02 | -3.91E-01 | 7.01E-02 | -1.62E-01 | 2.57E-01 | -7.70E-02 | -1.26E-01 | -6.74E-02 |
| 4.07E-01 | -2.40E-01 | 1.57E-01 | -1.30E-01 | 2.86E-01 | -5.63E-02 | -1.27E-01 | -6.73E-02 |
| -3.74E-01 | -1.47E-02 | 2.34E-01 | -9.86E-02 | 3.12E-01 | -3.53E-02 | -1.28E-01 | -6.71E-02 |
| 4.95E-02 | 2.42E-01 | 2.86E-01 | -6.75E-02 | 3.32E-01 | -1.41E-02 | -1.30E-01 | -6.69E-02 |
| 2.16E-01 | 3.97E-01 | 3.01E-01 | -3.71E-02 | 3.48E-01 | 7.42E-03 | -1.31E-01 | -6.68E-02 |
| -1.41E-01 | 3.23E-01 | 2.71E-01 | -7.93E-03 | 3.57E-01 | 2.91E-02 | -1.33E-01 | -6.66E-02 |
| 1.02E-01 | 9.26E-02 | 2.06E-01 | 1.94E-02 | 3.61E-01 | 5.11E-02 | -1.34E-01 | -6.64E-02 |
| -1.05E-01 | -5.86E-02 | 1.20E-01 | 4.40E-02 | 3.57E-01 | 7.31E-02 | -1.35E-01 | -6.63E-02 |
| 3.97E-02 | -1.45E-01 | 3.04E-02 | 6.49E-02 | 3.47E-01 | 9.54E-02 | -1.37E-01 | -6.61E-02 |
| 1.54E-01 | -1.98E-01 | -4.96E-02 | 8.10E-02 | 3.28E-01 | 1.18E-01 | -1.38E-01 | -6.59E-02 |
| 2.39E-01 | -2.33E-01 | -1.04E-01 | 9.11E-02 | 3.02E-01 | 1.40E-01 | -1.39E-01 | -6.58E-02 |
| 2.72E-01 | -2.42E-01 | -1.19E-01 | 9.35E-02 | 2.68E-01 | 1.62E-01 | -1.40E-01 | -6.56E-02 |
| -2.69E-01 | -1.10E-01 | -8.50E-02 | 8.70E-02 | 2.27E-01 | 1.84E-01 | -1.41E-01 | -6.54E-02 |
| 2.33E-01 | 1.71E-01 | -2.47E-02 | 7.31E-02 | 1.80E-01 | 2.06E-01 | -1.42E-01 | -6.53E-02 |
| -1.87E-01 | 1.81E-01 | 3.33E-02 | 5.40E-02 | 1.29E-01 | 2.28E-01 | -1.43E-01 | -6.51E-02 |
| 1.51E-01 | -1.30E-01 | 6.30E-02 | 3.21E-02 | 7.40E-02 | 2.49E-01 | -1.45E-01 | -6.49E-02 |
| -1.28E-01 | -1.83E-01 | 5.12E-02 | 1.02E-02 | 1.75E-02 | 2.69E-01 | -1.46E-01 | -6.48E-02 |
| 1.13E-01 | 8.79E-02 | -1.31E-03 | -8.92E-03 | -3.96E-02 | 2.89E-01 | -1.47E-01 | -6.46E-02 |
| 6.06E-02 | 2.40E-01 | -4.91E-02 | -2.27E-02 | -9.59E-02 | 3.09E-01 | -1.47E-01 | -6.44E-02 |
| -1.55E-01 | 9.63E-02 | -4.97E-02 | -2.87E-02 | -1.50E-01 | 3.28E-01 | -1.48E-01 | -6.42E-02 |
| 1.66E-01 | -2.28E-01 | -1.58E-02 | -2.58E-02 | -2.01E-01 | 3.46E-01 | -1.49E-01 | -6.41E-02 |
| 3.16E-01 | -4.03E-01 | 2.91E-02 | -1.61E-02 | -2.47E-01 | 3.63E-01 | -1.50E-01 | -6.39E-02 |
| -3.45E-01 | -1.67E-01 | 6.38E-02 | -2.74E-03 | -2.87E-01 | 3.79E-01 | -1.51E-01 | -6.37E-02 |
| -3.87E-01 | 2.70E-01 | 7.47E-02 | 1.14E-02 | -3.20E-01 | 3.94E-01 | -1.52E-01 | -6.36E-02 |
| 1.54E-01 | 5.57E-01 | 4.97E-02 | 2.33E-02 | -3.44E-01 | 4.07E-01 | -1.52E-01 | -6.34E-02 |
| -5.27E-02 | 4.22E-01 | -1.47E-02 | 3.00E-02 | -3.59E-01 | 4.20E-01 | -1.53E-01 | -6.32E-02 |
| 5.56E-02 | -2.09E-02 | -8.84E-02 | 2.86E-02 | -3.62E-01 | 4.31E-01 | -1.54E-01 | -6.31E-02 |
| 1.29E-01 | -4.57E-01 | -1.33E-01 | 1.67E-02 | -3.55E-01 | 4.42E-01 | -1.54E-01 | -6.29E-02 |
| -1.81E-01 | -5.74E-01 | -1.11E-01 | -5.52E-03 | -3.37E-01 | 4.50E-01 | -1.55E-01 | -6.27E-02 |
| 1.42E-01 | -2.03E-01 | -5.50E-03 | -3.41E-02 | -3.12E-01 | 4.58E-01 | -1.55E-01 | -6.25E-02 |
| -7.57E-02 | 2.75E-01 | 1.29E-01 | -6.43E-02 | -2.80E-01 | 4.64E-01 | -1.56E-01 | -6.24E-02 |
| 7.93E-02 | 4.17E-01 | 2.21E-01 | -9.19E-02 | -2.44E-01 | 4.69E-01 | -1.56E-01 | -6.22E-02 |
| -1.50E-01 | 2.30E-01 | 2.13E-01 | -1.13E-01 | -2.04E-01 | 4.73E-01 | -1.57E-01 | -6.20E-02 |
| 2.34E-01 | -9.01E-02 | 1.16E-01 | -1.24E-01 | -1.62E-01 | 4.75E-01 | -1.57E-01 | -6.18E-02 |
| 6.27E-02 | -2.05E-01 | -4.58E-02 | -1.24E-01 | -1.18E-01 | 4.76E-01 | -1.57E-01 | -6.17E-02 |
| -3.30E-01 | -8.43E-02 | -2.33E-01 | -1.12E-01 | -7.26E-02 | 4.76E-01 | -1.58E-01 | -6.15E-02 |
| 3.35E-01 | 1.07E-01 | -3.55E-01 | -8.76E-02 | -2.64E-02 | 4.75E-01 | -1.58E-01 | -6.13E-02 |
| 2.52E-01 | 7.62E-02 | -3.23E-01 | -5.00E-02 | 2.03E-02 | 4.73E-01 | -1.58E-01 | -6.12E-02 |
| -2.77E-01 | -4.84E-02 | -1.64E-01 | -1.38E-03 | 6.69E-02 | 4.70E-01 | -1.58E-01 | -6.10E-02 |
| 2.31E-01 | -7.77E-02 | 6.28E-02 | 5.56E-02 | 1.13E-01 | 4.65E-01 | -1.58E-01 | -6.08E-02 |
| 2.22E-01 | 4.51E-03 | 2.89E-01 | 1.19E-01 | 1.58E-01 | 4.59E-01 | -1.58E-01 | -6.06E-02 |
| -1.57E-01 | 1.16E-01 | 4.53E-01 | 1.85E-01 | 2.02E-01 | 4.53E-01 | -1.58E-01 | -6.05E-02 |
| 1.43E-01 | 6.29E-02 | 5.07E-01 | 2.52E-01 | 2.45E-01 | 4.45E-01 | -1.58E-01 | -6.03E-02 |
| -1.49E-01 | -8.67E-02 | 4.50E-01 | 3.17E-01 | 2.85E-01 | 4.36E-01 | -1.58E-01 | -6.01E-02 |
| -2.89E-03 | -1.89E-01 | 3.17E-01 | 3.78E-01 | 3.22E-01 | 4.26E-01 | -1.58E-01 | -5.99E-02 |
| 1.22E-01 | -2.23E-01 | 1.44E-01 | 4.36E-01 | 3.57E-01 | 4.15E-01 | -1.58E-01 | -5.98E-02 |
| 2.06E-01 | -1.99E-01 | -3.64E-02 | 4.89E-01 | 3.88E-01 | 4.03E-01 | -1.57E-01 | -5.96E-02 |
| 2.51E-01 | -1.34E-01 | -2.10E-01 | 5.37E-01 | 4.15E-01 | 3.90E-01 | -1.57E-01 | -5.94E-02 |
| 2.61E-01 | -3.93E-02 | -3.67E-01 | 5.81E-01 | 4.37E-01 | 3.76E-01 | -1.57E-01 | -5.93E-02 |
| -1.72E-01 | 8.07E-02 | -4.97E-01 | 6.20E-01 | 4.55E-01 | 3.61E-01 | -1.56E-01 | -5.91E-02 |
| -2.32E-01 | 2.01E-01 | -5.89E-01 | 6.53E-01 | 4.68E-01 | 3.45E-01 | -1.56E-01 | -5.89E-02 |
| 1.06E-01 | 2.86E-01 | -6.28E-01 | 6.81E-01 | 4.75E-01 | 3.28E-01 | -1.56E-01 | -5.87E-02 |
| 1.37E-01 | 2.28E-01 | -6.07E-01 | 7.02E-01 | 4.76E-01 | 3.11E-01 | -1.55E-01 | -5.86E-02 |
| -8.42E-02 | -1.93E-02 | -5.33E-01 | 7.19E-01 | 4.70E-01 | 2.92E-01 | -1.55E-01 | -5.84E-02 |
| 5.10E-02 | -2.49E-01 | -4.18E-01 | 7.29E-01 | 4.58E-01 | 2.73E-01 | -1.54E-01 | -5.82E-02 |
| -5.48E-02 | -2.53E-01 | -2.74E-01 | 7.33E-01 | 4.39E-01 | 2.53E-01 | -1.53E-01 | -5.80E-02 |
| 1.01E-01 | -1.18E-01 | -1.16E-01 | 7.30E-01 | 4.14E-01 | 2.33E-01 | -1.53E-01 | -5.79E-02 |
| -1.77E-01 | 5.92E-02 | 4.53E-02 | 7.20E-01 | 3.84E-01 | 2.12E-01 | -1.52E-01 | -5.77E-02 |
| 2.26E-02 | 1.83E-01 | 1.99E-01 | 7.01E-01 | 3.49E-01 | 1.90E-01 | -1.51E-01 | -5.75E-02 |
| 3.46E-01 | 2.15E-01 | 3.35E-01 | 6.73E-01 | 3.09E-01 | 1.68E-01 | -1.51E-01 | -5.73E-02 |
| -4.07E-01 | 1.59E-01 | 4.43E-01 | 6.35E-01 | 2.65E-01 | 1.45E-01 | -1.50E-01 | -5.72E-02 |
| 9.59E-02 | 1.01E-01 | 5.18E-01 | 5.87E-01 | 2.18E-01 | 1.22E-01 | -1.49E-01 | -5.70E-02 |
| 2.41E-01 | 5.09E-02 | 5.55E-01 | 5.27E-01 | 1.68E-01 | 9.90E-02 | -1.48E-01 | -5.68E-02 |
| 4.51E-01 | -1.29E-02 | 5.56E-01 | 4.55E-01 | 1.15E-01 | 7.55E-02 | -1.47E-01 | -5.66E-02 |
| 3.34E-01 | -1.05E-01 | 5.22E-01 | 3.72E-01 | 6.07E-02 | 5.18E-02 | -1.46E-01 | -5.65E-02 |
| -1.41E-01 | -1.95E-01 | 4.55E-01 | 2.80E-01 | 4.60E-03 | 2.80E-02 | -1.45E-01 | -5.63E-02 |
| -2.13E-01 | -2.45E-01 | 3.55E-01 | 1.78E-01 | -5.25E-02 | 4.09E-03 | -1.44E-01 | -5.61E-02 |
| -3.26E-01 | -2.15E-01 | 2.25E-01 | 6.99E-02 | -1.10E-01 | -1.98E-02 | -1.43E-01 | -5.59E-02 |
| 2.87E-01 | -8.02E-02 | 7.43E-02 | -4.43E-02 | -1.68E-01 | -4.37E-02 | -1.42E-01 | -5.58E-02 |
| 2.22E-02 | 1.38E-01 | -8.33E-02 | -1.63E-01 | -2.24E-01 | -6.75E-02 | -1.41E-01 | -5.56E-02 |
| -2.12E-01 | 3.11E-01 | -2.24E-01 | -2.85E-01 | -2.80E-01 | -9.12E-02 | -1.40E-01 | -5.54E-02 |
| 9.24E-02 | 3.10E-01 | -3.27E-01 | -4.08E-01 | -3.35E-01 | -1.15E-01 | -1.39E-01 | -5.53E-02 |
| 1.48E-01 | 1.07E-01 | -3.85E-01 | -5.31E-01 | -3.87E-01 | -1.38E-01 | -1.38E-01 | -5.51E-02 |
| -1.36E-01 | -2.14E-01 | -3.90E-01 | -6.54E-01 | -4.37E-01 | -1.61E-01 | -1.36E-01 | -5.49E-02 |
| 1.53E-01 | -3.66E-01 | -3.40E-01 | -7.73E-01 | -4.84E-01 | -1.83E-01 | -1.35E-01 | -5.47E-02 |
| 4.05E-02 | -1.79E-01 | -2.36E-01 | -8.88E-01 | -5.27E-01 | -2.05E-01 | -1.34E-01 | -5.46E-02 |
| -2.78E-01 | 1.71E-01 | -1.00E-01 | -9.95E-01 | -5.66E-01 | -2.27E-01 | -1.32E-01 | -5.44E-02 |
| 3.44E-01 | 3.67E-01 | 3.67E-02 | -1.09E+00 | -6.01E-01 | -2.48E-01 | -1.31E-01 | -5.42E-02 |
| 4.38E-01 | 2.94E-01 | 1.50E-01 | -1.18E+00 | -6.30E-01 | -2.68E-01 | -1.30E-01 | -5.40E-02 |
| -4.89E-01 | 4.79E-02 | 2.29E-01 | -1.25E+00 | -6.54E-01 | -2.88E-01 | -1.28E-01 | -5.39E-02 |
| -2.39E-01 | -1.57E-01 | 2.73E-01 | -1.30E+00 | -6.72E-01 | -3.07E-01 | -1.27E-01 | -5.37E-02 |
| -6.76E-02 | -2.71E-01 | 2.79E-01 | -1.34E+00 | -6.83E-01 | -3.26E-01 | -1.25E-01 | -5.35E-02 |
| 2.32E-02 | -2.95E-01 | 2.50E-01 | -1.36E+00 | -6.88E-01 | -3.43E-01 | -1.23E-01 | -5.33E-02 |
| 3.50E-02 | -2.31E-01 | 1.86E-01 | -1.36E+00 | -6.84E-01 | -3.60E-01 | -1.22E-01 | -5.32E-02 |
| 3.71E-01 | -9.17E-02 | 9.90E-02 | -1.34E+00 | -6.74E-01 | -3.76E-01 | -1.20E-01 | -5.30E-02 |
| -1.56E-01 | 9.09E-02 | 3.04E-03 | -1.31E+00 | -6.56E-01 | -3.91E-01 | -1.19E-01 | -5.28E-02 |
| -2.59E-01 | 2.21E-01 | -8.69E-02 | -1.25E+00 | -6.32E-01 | -4.05E-01 | -1.17E-01 | -5.26E-02 |
| 1.33E-01 | 2.14E-01 | -1.57E-01 | -1.19E+00 | -6.01E-01 | -4.18E-01 | -1.15E-01 | -5.25E-02 |
| 1.87E-01 | 9.54E-02 | -2.02E-01 | -1.10E+00 | -5.65E-01 | -4.30E-01 | -1.13E-01 | -5.23E-02 |
| -1.78E-01 | -5.01E-02 | -2.23E-01 | -1.01E+00 | -5.24E-01 | -4.41E-01 | -1.12E-01 | -5.21E-02 |
| 1.83E-01 | -1.53E-01 | -2.27E-01 | -8.95E-01 | -4.78E-01 | -4.52E-01 | -1.10E-01 | -5.19E-02 |
| 3.43E-02 | -1.74E-01 | -2.21E-01 | -7.74E-01 | -4.27E-01 | -4.61E-01 | -1.08E-01 | -5.18E-02 |
| -2.11E-01 | -1.16E-01 | -2.10E-01 | -6.45E-01 | -3.73E-01 | -4.70E-01 | -1.06E-01 | -5.16E-02 |
| -1.23E-01 | -4.64E-03 | -1.95E-01 | -5.10E-01 | -3.15E-01 | -4.78E-01 | -1.04E-01 | -5.14E-02 |
| -5.51E-02 | 1.13E-01 | -1.75E-01 | -3.69E-01 | -2.55E-01 | -4.85E-01 | -1.02E-01 | -5.13E-02 |
| 4.96E-02 | 1.83E-01 | -1.50E-01 | -2.25E-01 | -1.92E-01 | -4.91E-01 | -1.00E-01 | -5.11E-02 |
| 2.46E-01 | 1.51E-01 | -1.20E-01 | -7.92E-02 | -1.27E-01 | -4.96E-01 | -9.84E-02 | -5.09E-02 |
| -2.47E-01 | -3.60E-03 | -8.29E-02 | 6.58E-02 | -6.05E-02 | -5.01E-01 | -9.64E-02 | -5.07E-02 |
| 6.51E-02 | -1.69E-01 | -3.63E-02 | 2.09E-01 | 6.97E-03 | -5.05E-01 | -9.44E-02 | -5.06E-02 |
| 2.45E-01 | -2.11E-01 | 2.15E-02 | 3.47E-01 | 7.51E-02 | -5.08E-01 | -9.23E-02 | -5.04E-02 |
| -1.80E-01 | -5.54E-02 | 9.01E-02 | 4.80E-01 | 1.43E-01 | -5.10E-01 | -9.03E-02 | -5.02E-02 |
| -2.45E-01 | 1.49E-01 | 1.59E-01 | 6.06E-01 | 2.11E-01 | -5.12E-01 | -8.81E-02 | -5.00E-02 |
| 2.43E-01 | 2.23E-01 | 2.15E-01 | 7.22E-01 | 2.78E-01 | -5.13E-01 | -8.60E-02 | -4.99E-02 |
| -2.35E-01 | 9.49E-02 | 2.47E-01 | 8.27E-01 | 3.44E-01 | -5.13E-01 | -8.38E-02 | -4.97E-02 |
| -2.09E-01 | -9.44E-02 | 2.51E-01 | 9.19E-01 | 4.09E-01 | -5.12E-01 | -8.16E-02 | -4.95E-02 |
| 1.99E-01 | -2.18E-01 | 2.26E-01 | 9.96E-01 | 4.71E-01 | -5.11E-01 | -7.94E-02 | -4.94E-02 |
| 1.18E-01 | -2.09E-01 | 1.72E-01 | 1.06E+00 | 5.30E-01 | -5.09E-01 | -7.72E-02 | -4.92E-02 |
| -1.77E-02 | -1.07E-01 | 9.61E-02 | 1.11E+00 | 5.86E-01 | -5.06E-01 | -7.49E-02 | -4.90E-02 |
| -1.52E-01 | 2.36E-02 | 8.00E-03 | 1.14E+00 | 6.39E-01 | -5.03E-01 | -7.26E-02 | -4.88E-02 |
| 1.61E-01 | 1.25E-01 | -8.12E-02 | 1.16E+00 | 6.88E-01 | -4.99E-01 | -7.03E-02 | -4.87E-02 |
| 1.30E-01 | 1.75E-01 | -1.60E-01 | 1.17E+00 | 7.32E-01 | -4.94E-01 | -6.80E-02 | -4.85E-02 |
| -2.33E-01 | 1.52E-01 | -2.19E-01 | 1.16E+00 | 7.71E-01 | -4.89E-01 | -6.57E-02 | -4.83E-02 |
| 2.61E-01 | 6.90E-02 | -2.54E-01 | 1.15E+00 | 8.05E-01 | -4.83E-01 | -6.33E-02 | -4.81E-02 |
| 3.61E-01 | -2.95E-02 | -2.63E-01 | 1.12E+00 | 8.34E-01 | -4.76E-01 | -6.09E-02 | -4.80E-02 |
| 4.22E-01 | -9.86E-02 | -2.45E-01 | 1.08E+00 | 8.57E-01 | -4.69E-01 | -5.85E-02 | -4.78E-02 |
| 2.57E-02 | -1.23E-01 | -2.00E-01 | 1.02E+00 | 8.74E-01 | -4.61E-01 | -5.61E-02 | -4.76E-02 |
| -1.28E-02 | -1.12E-01 | -1.31E-01 | 9.57E-01 | 8.85E-01 | -4.53E-01 | -5.36E-02 | -4.75E-02 |
| -4.81E-01 | -7.42E-02 | -4.63E-02 | 8.83E-01 | 8.92E-01 | -4.44E-01 | -5.12E-02 | -4.73E-02 |
| -5.58E-01 | -1.87E-02 | 4.25E-02 | 8.02E-01 | 8.93E-01 | -4.34E-01 | -4.87E-02 | -4.71E-02 |
| -6.29E-01 | 4.79E-02 | 1.25E-01 | 7.15E-01 | 8.90E-01 | -4.24E-01 | -4.62E-02 | -4.69E-02 |
| -2.72E-01 | 1.12E-01 | 1.92E-01 | 6.24E-01 | 8.81E-01 | -4.13E-01 | -4.37E-02 | -4.68E-02 |
| 5.79E-01 | 1.17E-01 | 2.31E-01 | 5.32E-01 | 8.69E-01 | -4.02E-01 | -4.12E-02 | -4.66E-02 |
| 3.61E-01 | 2.44E-02 | 2.33E-01 | 4.41E-01 | 8.51E-01 | -3.90E-01 | -3.87E-02 | -4.64E-02 |
| 2.11E-01 | -1.00E-01 | 2.00E-01 | 3.53E-01 | 8.30E-01 | -3.78E-01 | -3.62E-02 | -4.63E-02 |
| -3.73E-01 | -1.64E-01 | 1.36E-01 | 2.70E-01 | 8.04E-01 | -3.65E-01 | -3.36E-02 | -4.61E-02 |
| 1.43E-01 | -9.86E-02 | 4.91E-02 | 1.91E-01 | 7.75E-01 | -3.51E-01 | -3.11E-02 | -4.59E-02 |
| 1.75E-01 | 5.48E-02 | -4.59E-02 | 1.17E-01 | 7.42E-01 | -3.38E-01 | -2.85E-02 | -4.58E-02 |
| 1.77E-01 | 2.22E-01 | -1.29E-01 | 4.96E-02 | 7.06E-01 | -3.23E-01 | -2.59E-02 | -4.56E-02 |
| -1.49E-01 | 2.81E-01 | -1.79E-01 | -1.18E-02 | 6.66E-01 | -3.09E-01 | -2.33E-02 | -4.54E-02 |
| 1.41E-01 | 7.16E-02 | -1.81E-01 | -6.64E-02 | 6.23E-01 | -2.93E-01 | -2.07E-02 | -4.52E-02 |
| 8.67E-02 | -2.38E-01 | -1.43E-01 | -1.14E-01 | 5.77E-01 | -2.78E-01 | -1.81E-02 | -4.51E-02 |
| -1.57E-01 | -3.87E-01 | -8.13E-02 | -1.56E-01 | 5.29E-01 | -2.62E-01 | -1.55E-02 | -4.49E-02 |
| 5.31E-02 | -1.99E-01 | -9.00E-03 | -1.92E-01 | 4.78E-01 | -2.46E-01 | -1.29E-02 | -4.47E-02 |
| 8.68E-02 | 1.65E-01 | 5.92E-02 | -2.22E-01 | 4.25E-01 | -2.29E-01 | -1.03E-02 | -4.46E-02 |
| 2.04E-01 | 4.63E-01 | 1.09E-01 | -2.49E-01 | 3.69E-01 | -2.13E-01 | -7.69E-03 | -4.44E-02 |
| -1.87E-01 | 4.97E-01 | 1.27E-01 | -2.74E-01 | 3.12E-01 | -1.96E-01 | -5.07E-03 | -4.42E-02 |
| -2.58E-01 | 2.51E-01 | 1.06E-01 | -2.99E-01 | 2.52E-01 | -1.78E-01 | -2.44E-03 | -4.41E-02 |
| 2.93E-01 | -1.87E-01 | 5.65E-02 | -3.22E-01 | 1.92E-01 | -1.61E-01 | 1.85E-04 | -4.39E-02 |
| -8.75E-02 | -4.90E-01 | -1.66E-03 | -3.43E-01 | 1.29E-01 | -1.43E-01 | 2.81E-03 | -4.37E-02 |
| -3.55E-01 | -5.14E-01 | -5.11E-02 | -3.61E-01 | 6.59E-02 | -1.25E-01 | 5.44E-03 | -4.36E-02 |
| 2.60E-01 | -2.40E-01 | -7.77E-02 | -3.75E-01 | 1.43E-03 | -1.07E-01 | 8.08E-03 | -4.34E-02 |
| 3.61E-01 | 1.19E-01 | -8.26E-02 | -3.84E-01 | -6.39E-02 | -8.94E-02 | 1.07E-02 | -4.32E-02 |
| -2.33E-01 | 3.47E-01 | -7.09E-02 | -3.87E-01 | -1.30E-01 | -7.12E-02 | 1.33E-02 | -4.31E-02 |
| -3.02E-01 | 4.34E-01 | -4.79E-02 | -3.83E-01 | -1.96E-01 | -5.29E-02 | 1.60E-02 | -4.29E-02 |
| -2.92E-01 | 4.28E-01 | -1.82E-02 | -3.71E-01 | -2.63E-01 | -3.46E-02 | 1.86E-02 | -4.27E-02 |
| -2.50E-01 | 3.80E-01 | 1.31E-02 | -3.50E-01 | -3.30E-01 | -1.63E-02 | 2.12E-02 | -4.26E-02 |
| 1.76E-01 | 3.44E-01 | 4.07E-02 | -3.21E-01 | -3.96E-01 | 2.05E-03 | 2.38E-02 | -4.24E-02 |
| -1.44E-01 | 2.50E-01 | 5.91E-02 | -2.82E-01 | -4.62E-01 | 2.04E-02 | 2.64E-02 | -4.22E-02 |
| 1.18E-01 | -1.93E-02 | 6.28E-02 | -2.35E-01 | -5.26E-01 | 3.86E-02 | 2.90E-02 | -4.21E-02 |
| -4.65E-02 | -2.55E-01 | 4.64E-02 | -1.80E-01 | -5.88E-01 | 5.68E-02 | 3.16E-02 | -4.19E-02 |
| -7.55E-02 | -2.12E-01 | 9.74E-03 | -1.19E-01 | -6.48E-01 | 7.49E-02 | 3.42E-02 | -4.17E-02 |
| 6.43E-02 | 6.48E-02 | -3.35E-02 | -5.49E-02 | -7.03E-01 | 9.29E-02 | 3.68E-02 | -4.16E-02 |
| -7.06E-02 | 2.01E-01 | -6.60E-02 | 7.12E-03 | -7.55E-01 | 1.11E-01 | 3.94E-02 | -4.14E-02 |
| 1.02E-01 | 6.22E-03 | -7.46E-02 | 6.37E-02 | -8.01E-01 | 1.28E-01 | 4.20E-02 | -4.12E-02 |
| -1.52E-01 | -1.83E-01 | -6.23E-02 | 1.13E-01 | -8.42E-01 | 1.46E-01 | 4.45E-02 | -4.11E-02 |
| 2.04E-01 | -1.89E-01 | -3.62E-02 | 1.53E-01 | -8.75E-01 | 1.63E-01 | 4.71E-02 | -4.09E-02 |
| 7.49E-02 | -1.17E-01 | -2.11E-03 | 1.82E-01 | -9.01E-01 | 1.80E-01 | 4.96E-02 | -4.08E-02 |
| -7.93E-02 | -1.88E-02 | 3.45E-02 | 2.00E-01 | -9.19E-01 | 1.97E-01 | 5.21E-02 | -4.06E-02 |
| -2.31E-01 | 8.48E-02 | 6.85E-02 | 2.04E-01 | -9.29E-01 | 2.14E-01 | 5.46E-02 | -4.04E-02 |
| -3.53E-01 | 1.72E-01 | 9.46E-02 | 1.94E-01 | -9.29E-01 | 2.30E-01 | 5.71E-02 | -4.03E-02 |
| 3.84E-01 | 2.23E-01 | 1.07E-01 | 1.69E-01 | -9.20E-01 | 2.46E-01 | 5.96E-02 | -4.01E-02 |
| -4.19E-01 | 2.31E-01 | 1.00E-01 | 1.32E-01 | -9.03E-01 | 2.62E-01 | 6.21E-02 | -3.99E-02 |
| -3.40E-01 | 1.85E-01 | 7.17E-02 | 8.54E-02 | -8.78E-01 | 2.77E-01 | 6.45E-02 | -3.98E-02 |
| -2.01E-01 | 9.33E-02 | 2.79E-02 | 3.17E-02 | -8.46E-01 | 2.92E-01 | 6.70E-02 | -3.96E-02 |
| 3.67E-01 | -2.10E-02 | -2.22E-02 | -2.58E-02 | -8.07E-01 | 3.07E-01 | 6.94E-02 | -3.94E-02 |
| 5.21E-01 | -1.31E-01 | -6.97E-02 | -8.39E-02 | -7.62E-01 | 3.21E-01 | 7.18E-02 | -3.93E-02 |
| 6.24E-01 | -2.10E-01 | -1.06E-01 | -1.39E-01 | -7.12E-01 | 3.35E-01 | 7.42E-02 | -3.91E-02 |
| 6.41E-01 | -2.33E-01 | -1.21E-01 | -1.89E-01 | -6.56E-01 | 3.49E-01 | 7.66E-02 | -3.90E-02 |
| -6.53E-01 | -1.90E-01 | -1.11E-01 | -2.31E-01 | -5.96E-01 | 3.62E-01 | 7.89E-02 | -3.88E-02 |
| -4.32E-01 | -8.78E-02 | -8.02E-02 | -2.62E-01 | -5.32E-01 | 3.75E-01 | 8.12E-02 | -3.86E-02 |
| 1.44E-01 | 3.46E-02 | -3.75E-02 | -2.81E-01 | -4.65E-01 | 3.88E-01 | 8.36E-02 | -3.85E-02 |
| 3.25E-01 | 1.32E-01 | 9.82E-03 | -2.89E-01 | -3.96E-01 | 4.00E-01 | 8.58E-02 | -3.83E-02 |
| 5.66E-01 | 1.59E-01 | 5.39E-02 | -2.85E-01 | -3.24E-01 | 4.11E-01 | 8.81E-02 | -3.82E-02 |
| 4.98E-01 | 8.96E-02 | 8.71E-02 | -2.68E-01 | -2.50E-01 | 4.23E-01 | 9.03E-02 | -3.80E-02 |
| 7.37E-02 | -2.16E-02 | 1.03E-01 | -2.38E-01 | -1.76E-01 | 4.33E-01 | 9.26E-02 | -3.78E-02 |
| -3.76E-01 | -9.73E-02 | 9.46E-02 | -1.94E-01 | -1.01E-01 | 4.44E-01 | 9.48E-02 | -3.77E-02 |
| 3.04E-01 | -8.17E-02 | 6.11E-02 | -1.39E-01 | -2.55E-02 | 4.54E-01 | 9.69E-02 | -3.75E-02 |
| 1.29E-01 | -1.08E-02 | 1.31E-02 | -7.40E-02 | 4.93E-02 | 4.63E-01 | 9.91E-02 | -3.74E-02 |
| -4.42E-02 | 5.24E-02 | -3.54E-02 | -5.12E-04 | 1.23E-01 | 4.72E-01 | 1.01E-01 | -3.72E-02 |
| -1.64E-01 | 4.52E-02 | -7.11E-02 | 7.92E-02 | 1.96E-01 | 4.80E-01 | 1.03E-01 | -3.71E-02 |
| 1.72E-01 | -3.97E-02 | -8.39E-02 | 1.63E-01 | 2.66E-01 | 4.88E-01 | 1.05E-01 | -3.69E-02 |
| 6.07E-03 | -5.04E-02 | -6.95E-02 | 2.46E-01 | 3.35E-01 | 4.96E-01 | 1.07E-01 | -3.67E-02 |
| -2.52E-01 | 1.42E-02 | -3.29E-02 | 3.29E-01 | 4.00E-01 | 5.03E-01 | 1.09E-01 | -3.66E-02 |
| 2.92E-01 | 7.80E-02 | 1.53E-02 | 4.07E-01 | 4.62E-01 | 5.09E-01 | 1.11E-01 | -3.64E-02 |
| -2.25E-01 | 8.55E-03 | 6.22E-02 | 4.78E-01 | 5.20E-01 | 5.15E-01 | 1.13E-01 | -3.63E-02 |
| -2.57E-01 | -1.11E-01 | 9.08E-02 | 5.41E-01 | 5.74E-01 | 5.20E-01 | 1.15E-01 | -3.61E-02 |
| -3.25E-01 | -1.47E-01 | 8.76E-02 | 5.92E-01 | 6.23E-01 | 5.24E-01 | 1.17E-01 | -3.60E-02 |
| 3.10E-01 | -2.74E-02 | 5.14E-02 | 6.28E-01 | 6.66E-01 | 5.29E-01 | 1.19E-01 | -3.58E-02 |
| -2.90E-01 | 1.63E-01 | -3.84E-03 | 6.47E-01 | 7.04E-01 | 5.32E-01 | 1.21E-01 | -3.56E-02 |
| 8.45E-02 | 2.14E-01 | -6.27E-02 | 6.47E-01 | 7.35E-01 | 5.35E-01 | 1.23E-01 | -3.55E-02 |
| 2.58E-01 | 8.13E-02 | -1.12E-01 | 6.27E-01 | 7.60E-01 | 5.37E-01 | 1.24E-01 | -3.53E-02 |
| -2.55E-01 | -1.65E-01 | -1.36E-01 | 5.84E-01 | 7.79E-01 | 5.39E-01 | 1.26E-01 | -3.52E-02 |
| 2.64E-01 | -2.47E-01 | -1.20E-01 | 5.18E-01 | 7.91E-01 | 5.39E-01 | 1.28E-01 | -3.50E-02 |
| -2.80E-01 | -8.95E-02 | -5.78E-02 | 4.31E-01 | 7.98E-01 | 5.40E-01 | 1.29E-01 | -3.49E-02 |
| -5.69E-02 | 1.03E-01 | 3.08E-02 | 3.26E-01 | 7.99E-01 | 5.39E-01 | 1.31E-01 | -3.47E-02 |
| 2.51E-01 | 2.30E-01 | 1.20E-01 | 2.06E-01 | 7.96E-01 | 5.38E-01 | 1.32E-01 | -3.46E-02 |
| 3.22E-01 | 2.36E-01 | 1.83E-01 | 7.59E-02 | 7.87E-01 | 5.37E-01 | 1.34E-01 | -3.44E-02 |
| 1.98E-01 | 9.32E-02 | 1.99E-01 | -6.23E-02 | 7.74E-01 | 5.34E-01 | 1.35E-01 | -3.43E-02 |
| -2.23E-01 | -9.95E-02 | 1.71E-01 | -2.05E-01 | 7.56E-01 | 5.31E-01 | 1.37E-01 | -3.41E-02 |
| -2.77E-01 | -2.13E-01 | 1.04E-01 | -3.48E-01 | 7.35E-01 | 5.27E-01 | 1.38E-01 | -3.40E-02 |
| -6.69E-02 | -1.57E-01 | 5.90E-03 | -4.89E-01 | 7.09E-01 | 5.23E-01 | 1.40E-01 | -3.38E-02 |
| 4.86E-02 | 2.80E-03 | -1.02E-01 | -6.24E-01 | 6.80E-01 | 5.18E-01 | 1.41E-01 | -3.37E-02 |
| 1.48E-01 | 1.58E-01 | -1.94E-01 | -7.50E-01 | 6.48E-01 | 5.13E-01 | 1.42E-01 | -3.35E-02 |
| -1.07E-01 | 2.12E-01 | -2.42E-01 | -8.63E-01 | 6.13E-01 | 5.07E-01 | 1.44E-01 | -3.34E-02 |
| 8.59E-02 | 1.44E-01 | -2.26E-01 | -9.62E-01 | 5.76E-01 | 5.01E-01 | 1.45E-01 | -3.32E-02 |
| -9.81E-02 | -1.24E-02 | -1.59E-01 | -1.05E+00 | 5.36E-01 | 4.93E-01 | 1.46E-01 | -3.31E-02 |
| 1.48E-01 | -2.38E-01 | -6.11E-02 | -1.11E+00 | 4.94E-01 | 4.86E-01 | 1.47E-01 | -3.29E-02 |
| -2.24E-01 | -2.69E-01 | 4.76E-02 | -1.17E+00 | 4.50E-01 | 4.78E-01 | 1.48E-01 | -3.28E-02 |
| 3.02E-01 | 1.35E-02 | 1.45E-01 | -1.22E+00 | 4.05E-01 | 4.69E-01 | 1.49E-01 | -3.26E-02 |
| -3.60E-01 | 3.00E-01 | 2.14E-01 | -1.26E+00 | 3.58E-01 | 4.60E-01 | 1.50E-01 | -3.25E-02 |
| 7.04E-02 | 3.40E-01 | 2.36E-01 | -1.30E+00 | 3.10E-01 | 4.51E-01 | 1.51E-01 | -3.23E-02 |
| 3.80E-01 | 1.52E-01 | 2.03E-01 | -1.33E+00 | 2.62E-01 | 4.41E-01 | 1.52E-01 | -3.22E-02 |
| -3.41E-01 | -1.73E-01 | 1.29E-01 | -1.36E+00 | 2.13E-01 | 4.31E-01 | 1.53E-01 | -3.20E-02 |
| -3.11E-01 | -4.27E-01 | 3.47E-02 | -1.38E+00 | 1.64E-01 | 4.20E-01 | 1.54E-01 | -3.19E-02 |
| -1.34E-01 | -4.30E-01 | -5.80E-02 | -1.40E+00 | 1.16E-01 | 4.09E-01 | 1.55E-01 | -3.17E-02 |
| 1.60E-01 | -1.70E-01 | -1.30E-01 | -1.42E+00 | 6.74E-02 | 3.97E-01 | 1.56E-01 | -3.16E-02 |
| -1.29E-01 | 2.39E-01 | -1.73E-01 | -1.44E+00 | 1.98E-02 | 3.85E-01 | 1.57E-01 | -3.15E-02 |
| 1.30E-01 | 4.64E-01 | -1.79E-01 | -1.46E+00 | -2.69E-02 | 3.73E-01 | 1.57E-01 | -3.13E-02 |
| -1.05E-01 | 3.38E-01 | -1.45E-01 | -1.48E+00 | -7.23E-02 | 3.60E-01 | 1.58E-01 | -3.12E-02 |
| -1.64E-01 | 4.96E-03 | -8.34E-02 | -1.49E+00 | -1.16E-01 | 3.47E-01 | 1.59E-01 | -3.10E-02 |
| -2.42E-01 | -3.26E-01 | -1.08E-02 | -1.51E+00 | -1.58E-01 | 3.34E-01 | 1.59E-01 | -3.09E-02 |
| 2.74E-01 | -4.51E-01 | 5.58E-02 | -1.51E+00 | -1.98E-01 | 3.21E-01 | 1.60E-01 | -3.07E-02 |
| 7.29E-02 | -2.51E-01 | 1.02E-01 | -1.50E+00 | -2.36E-01 | 3.07E-01 | 1.61E-01 | -3.06E-02 |
| -2.81E-01 | 1.16E-01 | 1.21E-01 | -1.49E+00 | -2.71E-01 | 2.93E-01 | 1.61E-01 | -3.05E-02 |
| 2.59E-01 | 4.05E-01 | 1.11E-01 | -1.46E+00 | -3.04E-01 | 2.78E-01 | 1.62E-01 | -3.03E-02 |
| -8.51E-02 | 3.85E-01 | 7.31E-02 | -1.41E+00 | -3.34E-01 | 2.64E-01 | 1.62E-01 | -3.02E-02 |
| -1.88E-01 | 1.25E-01 | 1.95E-02 | -1.35E+00 | -3.62E-01 | 2.49E-01 | 1.62E-01 | -3.00E-02 |
| 1.56E-01 | -1.96E-01 | -3.43E-02 | -1.28E+00 | -3.88E-01 | 2.34E-01 | 1.63E-01 | -2.99E-02 |
| -1.35E-01 | -3.16E-01 | -7.29E-02 | -1.20E+00 | -4.11E-01 | 2.19E-01 | 1.63E-01 | -2.98E-02 |
| 7.29E-02 | -1.72E-01 | -8.48E-02 | -1.10E+00 | -4.32E-01 | 2.03E-01 | 1.64E-01 | -2.96E-02 |
| 1.34E-01 | 7.81E-02 | -7.26E-02 | -9.87E-01 | -4.51E-01 | 1.88E-01 | 1.64E-01 | -2.95E-02 |
| -1.51E-01 | 2.40E-01 | -4.19E-02 | -8.62E-01 | -4.68E-01 | 1.72E-01 | 1.64E-01 | -2.93E-02 |
| 1.65E-01 | 1.77E-01 | 8.44E-04 | -7.26E-01 | -4.83E-01 | 1.56E-01 | 1.64E-01 | -2.92E-02 |
| 1.97E-01 | -1.40E-02 | 4.40E-02 | -5.81E-01 | -4.96E-01 | 1.40E-01 | 1.65E-01 | -2.91E-02 |
| -2.10E-01 | -1.66E-01 | 7.41E-02 | -4.28E-01 | -5.07E-01 | 1.24E-01 | 1.65E-01 | -2.89E-02 |
| 3.78E-02 | -1.56E-01 | 8.28E-02 | -2.68E-01 | -5.16E-01 | 1.08E-01 | 1.65E-01 | -2.88E-02 |
| 2.05E-01 | -5.18E-02 | 7.22E-02 | -1.03E-01 | -5.23E-01 | 9.20E-02 | 1.65E-01 | -2.87E-02 |
| -1.27E-02 | 4.41E-02 | 4.67E-02 | 6.54E-02 | -5.28E-01 | 7.57E-02 | 1.65E-01 | -2.85E-02 |
| -1.69E-01 | 8.57E-02 | 1.07E-02 | 2.36E-01 | -5.32E-01 | 5.94E-02 | 1.65E-01 | -2.84E-02 |
| 1.49E-01 | 5.81E-02 | -3.07E-02 | 4.07E-01 | -5.34E-01 | 4.31E-02 | 1.65E-01 | -2.82E-02 |
| 8.51E-02 | 9.41E-03 | -7.04E-02 | 5.76E-01 | -5.34E-01 | 2.67E-02 | 1.65E-01 | -2.81E-02 |
| 5.97E-03 | -3.18E-02 | -1.01E-01 | 7.42E-01 | -5.33E-01 | 1.03E-02 | 1.65E-01 | -2.80E-02 |
| -1.13E-01 | -4.61E-02 | -1.14E-01 | 9.02E-01 | -5.30E-01 | -6.02E-03 | 1.65E-01 | -2.78E-02 |
| 1.10E-01 | -1.78E-02 | -1.07E-01 | 1.06E+00 | -5.26E-01 | -2.23E-02 | 1.65E-01 | -2.77E-02 |
| -1.10E-01 | 3.88E-02 | -7.89E-02 | 1.20E+00 | -5.20E-01 | -3.86E-02 | 1.64E-01 | -2.76E-02 |
| 1.08E-01 | 5.16E-02 | -3.57E-02 | 1.34E+00 | -5.13E-01 | -5.48E-02 | 1.64E-01 | -2.74E-02 |
| 2.71E-03 | -1.63E-02 | 1.75E-02 | 1.47E+00 | -5.05E-01 | -7.09E-02 | 1.64E-01 | -2.73E-02 |
| -1.03E-01 | -7.27E-02 | 6.98E-02 | 1.59E+00 | -4.95E-01 | -8.69E-02 | 1.64E-01 | -2.72E-02 |
| 1.08E-01 | -2.42E-02 | 1.14E-01 | 1.69E+00 | -4.84E-01 | -1.03E-01 | 1.63E-01 | -2.71E-02 |
| -1.24E-01 | 8.92E-02 | 1.46E-01 | 1.78E+00 | -4.73E-01 | -1.19E-01 | 1.63E-01 | -2.69E-02 |
| 1.50E-01 | 1.25E-01 | 1.67E-01 | 1.85E+00 | -4.60E-01 | -1.34E-01 | 1.63E-01 | -2.68E-02 |
| 1.39E-01 | 7.25E-02 | 1.74E-01 | 1.91E+00 | -4.45E-01 | -1.50E-01 | 1.62E-01 | -2.67E-02 |
| -2.23E-01 | -3.85E-03 | 1.69E-01 | 1.95E+00 | -4.30E-01 | -1.65E-01 | 1.62E-01 | -2.65E-02 |
| -1.88E-01 | -5.07E-02 | 1.57E-01 | 1.98E+00 | -4.14E-01 | -1.80E-01 | 1.62E-01 | -2.64E-02 |
| 2.59E-01 | -8.46E-02 | 1.39E-01 | 1.98E+00 | -3.97E-01 | -1.95E-01 | 1.61E-01 | -2.63E-02 |
| 3.33E-01 | -1.28E-01 | 1.18E-01 | 1.97E+00 | -3.80E-01 | -2.10E-01 | 1.61E-01 | -2.62E-02 |
| -3.60E-01 | -1.91E-01 | 9.62E-02 | 1.94E+00 | -3.61E-01 | -2.24E-01 | 1.60E-01 | -2.60E-02 |
| 1.65E-01 | -2.53E-01 | 7.46E-02 | 1.90E+00 | -3.42E-01 | -2.39E-01 | 1.59E-01 | -2.59E-02 |
| 2.80E-01 | -2.95E-01 | 5.54E-02 | 1.84E+00 | -3.22E-01 | -2.53E-01 | 1.59E-01 | -2.58E-02 |
| 3.68E-01 | -3.02E-01 | 4.00E-02 | 1.76E+00 | -3.02E-01 | -2.67E-01 | 1.58E-01 | -2.56E-02 |
| 4.15E-01 | -2.60E-01 | 2.86E-02 | 1.68E+00 | -2.81E-01 | -2.80E-01 | 1.58E-01 | -2.55E-02 |
| 4.21E-01 | -1.66E-01 | 1.85E-02 | 1.58E+00 | -2.59E-01 | -2.94E-01 | 1.57E-01 | -2.54E-02 |
| -8.18E-03 | -2.96E-02 | 6.94E-03 | 1.48E+00 | -2.37E-01 | -3.07E-01 | 1.56E-01 | -2.53E-02 |
| -4.35E-01 | 1.18E-01 | -8.48E-03 | 1.36E+00 | -2.15E-01 | -3.19E-01 | 1.55E-01 | -2.51E-02 |
| -4.22E-01 | 2.41E-01 | -2.97E-02 | 1.24E+00 | -1.93E-01 | -3.32E-01 | 1.55E-01 | -2.50E-02 |
| -3.44E-01 | 3.13E-01 | -5.78E-02 | 1.11E+00 | -1.70E-01 | -3.44E-01 | 1.54E-01 | -2.49E-02 |
| -1.83E-01 | 3.15E-01 | -9.31E-02 | 9.67E-01 | -1.47E-01 | -3.56E-01 | 1.53E-01 | -2.48E-02 |
| 4.68E-01 | 2.39E-01 | -1.33E-01 | 8.24E-01 | -1.25E-01 | -3.67E-01 | 1.52E-01 | -2.46E-02 |
| -1.15E-02 | 9.11E-02 | -1.73E-01 | 6.76E-01 | -1.02E-01 | -3.78E-01 | 1.51E-01 | -2.45E-02 |
| -4.74E-01 | -7.57E-02 | -2.07E-01 | 5.25E-01 | -7.89E-02 | -3.89E-01 | 1.50E-01 | -2.44E-02 |
| -1.85E-01 | -1.98E-01 | -2.32E-01 | 3.71E-01 | -5.62E-02 | -4.00E-01 | 1.49E-01 | -2.43E-02 |
| -1.67E-03 | -2.28E-01 | -2.43E-01 | 2.16E-01 | -3.38E-02 | -4.10E-01 | 1.48E-01 | -2.41E-02 |
| 4.47E-01 | -1.38E-01 | -2.35E-01 | 6.11E-02 | -1.16E-02 | -4.19E-01 | 1.47E-01 | -2.40E-02 |
| -4.24E-01 | 5.46E-02 | -2.17E-01 | -9.41E-02 | 1.03E-02 | -4.29E-01 | 1.46E-01 | -2.39E-02 |
| 3.92E-01 | 1.63E-01 | -1.95E-01 | -2.49E-01 | 3.18E-02 | -4.37E-01 | 1.45E-01 | -2.38E-02 |
| -1.85E-01 | 6.15E-02 | -1.77E-01 | -4.03E-01 | 5.29E-02 | -4.46E-01 | 1.44E-01 | -2.37E-02 |
| -3.02E-01 | -9.98E-02 | -1.59E-01 | -5.57E-01 | 7.34E-02 | -4.54E-01 | 1.43E-01 | -2.35E-02 |
| 2.46E-01 | -1.28E-01 | -1.36E-01 | -7.09E-01 | 9.34E-02 | -4.62E-01 | 1.42E-01 | -2.34E-02 |
| -1.93E-01 | 1.16E-02 | -9.82E-02 | -8.60E-01 | 1.13E-01 | -4.69E-01 | 1.41E-01 | -2.33E-02 |
| 1.58E-01 | 1.35E-01 | -3.16E-02 | -1.01E+00 | 1.31E-01 | -4.75E-01 | 1.39E-01 | -2.32E-02 |
| -1.52E-01 | 7.75E-02 | 7.01E-02 | -1.16E+00 | 1.49E-01 | -4.82E-01 | 1.38E-01 | -2.30E-02 |
| 6.13E-02 | -1.02E-01 | 1.70E-01 | -1.30E+00 | 1.66E-01 | -4.87E-01 | 1.37E-01 | -2.29E-02 |
| 2.07E-01 | -1.70E-01 | 2.19E-01 | -1.44E+00 | 1.82E-01 | -4.93E-01 | 1.36E-01 | -2.28E-02 |
| -2.35E-01 | 2.43E-02 | 1.81E-01 | -1.56E+00 | 1.97E-01 | -4.98E-01 | 1.34E-01 | -2.27E-02 |
| 2.31E-01 | 1.82E-01 | 6.43E-02 | -1.68E+00 | 2.11E-01 | -5.02E-01 | 1.33E-01 | -2.26E-02 |
| 2.28E-01 | 3.38E-02 | -9.68E-02 | -1.77E+00 | 2.24E-01 | -5.06E-01 | 1.32E-01 | -2.24E-02 |
| -1.93E-01 | -1.67E-01 | -2.07E-01 | -1.85E+00 | 2.36E-01 | -5.09E-01 | 1.30E-01 | -2.23E-02 |
| 1.61E-01 | -9.10E-02 | -1.84E-01 | -1.91E+00 | 2.47E-01 | -5.11E-01 | 1.29E-01 | -2.22E-02 |
| -1.57E-01 | 1.33E-01 | -5.87E-02 | -1.95E+00 | 2.56E-01 | -5.14E-01 | 1.27E-01 | -2.21E-02 |
| 1.72E-01 | 5.78E-02 | 1.03E-01 | -1.97E+00 | 2.64E-01 | -5.15E-01 | 1.26E-01 | -2.20E-02 |
| -1.80E-01 | -9.90E-02 | 2.03E-01 | -1.96E+00 | 2.71E-01 | -5.16E-01 | 1.24E-01 | -2.18E-02 |
| 1.62E-01 | -2.35E-02 | 1.66E-01 | -1.95E+00 | 2.76E-01 | -5.17E-01 | 1.23E-01 | -2.17E-02 |
| 1.53E-01 | 8.02E-02 | 3.54E-02 | -1.91E+00 | 2.79E-01 | -5.16E-01 | 1.21E-01 | -2.16E-02 |
| -8.50E-02 | 2.01E-02 | -1.15E-01 | -1.87E+00 | 2.81E-01 | -5.16E-01 | 1.20E-01 | -2.15E-02 |
| 6.21E-02 | -8.03E-02 | -2.14E-01 | -1.81E+00 | 2.82E-01 | -5.14E-01 | 1.18E-01 | -2.14E-02 |
| -6.46E-02 | -1.24E-02 | -2.12E-01 | -1.76E+00 | 2.82E-01 | -5.12E-01 | 1.16E-01 | -2.12E-02 |
| 8.69E-02 | 9.48E-02 | -1.28E-01 | -1.70E+00 | 2.80E-01 | -5.10E-01 | 1.15E-01 | -2.11E-02 |
| -6.73E-02 | 5.89E-02 | -1.14E-04 | -1.63E+00 | 2.77E-01 | -5.07E-01 | 1.13E-01 | -2.10E-02 |
| -1.45E-01 | -6.01E-02 | 1.33E-01 | -1.57E+00 | 2.73E-01 | -5.03E-01 | 1.11E-01 | -2.09E-02 |
| 1.65E-01 | -1.30E-01 | 2.27E-01 | -1.50E+00 | 2.67E-01 | -4.98E-01 | 1.10E-01 | -2.08E-02 |
| -1.20E-02 | -4.44E-02 | 2.50E-01 | -1.43E+00 | 2.61E-01 | -4.93E-01 | 1.08E-01 | -2.06E-02 |
| -1.82E-01 | 1.04E-01 | 2.01E-01 | -1.35E+00 | 2.53E-01 | -4.88E-01 | 1.06E-01 | -2.05E-02 |
| 1.90E-01 | 1.66E-01 | 9.53E-02 | -1.27E+00 | 2.45E-01 | -4.82E-01 | 1.04E-01 | -2.04E-02 |
| -3.39E-02 | 4.25E-02 | -3.78E-02 | -1.19E+00 | 2.36E-01 | -4.75E-01 | 1.02E-01 | -2.03E-02 |
| -2.17E-01 | -1.32E-01 | -1.65E-01 | -1.10E+00 | 2.26E-01 | -4.68E-01 | 1.01E-01 | -2.02E-02 |
| 2.36E-01 | -1.82E-01 | -2.55E-01 | -1.01E+00 | 2.15E-01 | -4.61E-01 | 9.87E-02 | -2.00E-02 |
| 3.09E-02 | -4.68E-02 | -2.83E-01 | -9.07E-01 | 2.03E-01 | -4.53E-01 | 9.68E-02 | -1.99E-02 |
| -2.78E-01 | 1.27E-01 | -2.55E-01 | -7.95E-01 | 1.91E-01 | -4.44E-01 | 9.49E-02 | -1.98E-02 |
| 2.95E-01 | 1.72E-01 | -1.83E-01 | -6.75E-01 | 1.78E-01 | -4.35E-01 | 9.30E-02 | -1.97E-02 |
| 1.82E-01 | 6.03E-02 | -8.09E-02 | -5.47E-01 | 1.65E-01 | -4.26E-01 | 9.10E-02 | -1.96E-02 |
| -3.19E-01 | -8.29E-02 | 3.31E-02 | -4.13E-01 | 1.51E-01 | -4.16E-01 | 8.91E-02 | -1.94E-02 |
| -9.56E-02 | -1.42E-01 | 1.38E-01 | -2.73E-01 | 1.37E-01 | -4.06E-01 | 8.71E-02 | -1.93E-02 |
| 6.18E-02 | -1.14E-01 | 2.18E-01 | -1.30E-01 | 1.23E-01 | -3.96E-01 | 8.51E-02 | -1.92E-02 |
| 1.94E-01 | -3.67E-02 | 2.70E-01 | 1.54E-02 | 1.08E-01 | -3.85E-01 | 8.31E-02 | -1.91E-02 |
| 3.42E-01 | 4.95E-02 | 2.96E-01 | 1.63E-01 | 9.28E-02 | -3.74E-01 | 8.10E-02 | -1.89E-02 |
| -2.59E-01 | 1.05E-01 | 2.98E-01 | 3.10E-01 | 7.76E-02 | -3.63E-01 | 7.90E-02 | -1.88E-02 |
| -3.71E-01 | 9.77E-02 | 2.76E-01 | 4.57E-01 | 6.24E-02 | -3.51E-01 | 7.69E-02 | -1.87E-02 |
| 4.17E-01 | 1.94E-02 | 2.31E-01 | 6.02E-01 | 4.71E-02 | -3.39E-01 | 7.48E-02 | -1.86E-02 |
| 4.25E-01 | -5.76E-02 | 1.63E-01 | 7.44E-01 | 3.19E-02 | -3.27E-01 | 7.28E-02 | -1.85E-02 |
| 1.76E-02 | -9.85E-02 | 7.66E-02 | 8.81E-01 | 1.68E-02 | -3.14E-01 | 7.07E-02 | -1.83E-02 |
| -4.20E-01 | -9.25E-02 | -2.02E-02 | 1.01E+00 | 1.77E-03 | -3.02E-01 | 6.85E-02 | -1.82E-02 |
| -5.02E-01 | -3.53E-02 | -1.15E-01 | 1.14E+00 | -1.30E-02 | -2.89E-01 | 6.64E-02 | -1.81E-02 |
| -2.23E-01 | 6.09E-02 | -1.98E-01 | 1.25E+00 | -2.75E-02 | -2.75E-01 | 6.43E-02 | -1.80E-02 |
| 4.86E-01 | 1.15E-01 | -2.57E-01 | 1.35E+00 | -4.17E-02 | -2.62E-01 | 6.21E-02 | -1.79E-02 |
| 4.81E-01 | 5.87E-02 | -2.82E-01 | 1.44E+00 | -5.55E-02 | -2.49E-01 | 5.99E-02 | -1.77E-02 |
| 9.91E-02 | -5.11E-02 | -2.67E-01 | 1.52E+00 | -6.88E-02 | -2.35E-01 | 5.78E-02 | -1.76E-02 |
| -3.45E-01 | -1.25E-01 | -2.12E-01 | 1.58E+00 | -8.16E-02 | -2.21E-01 | 5.56E-02 | -1.75E-02 |
| 2.87E-01 | -8.88E-02 | -1.23E-01 | 1.63E+00 | -9.38E-02 | -2.08E-01 | 5.34E-02 | -1.74E-02 |
| 1.83E-02 | 3.81E-02 | -1.51E-02 | 1.66E+00 | -1.05E-01 | -1.94E-01 | 5.12E-02 | -1.72E-02 |
| -1.95E-01 | 1.24E-01 | 9.22E-02 | 1.68E+00 | -1.16E-01 | -1.80E-01 | 4.90E-02 | -1.71E-02 |
| 1.72E-01 | 6.32E-02 | 1.82E-01 | 1.68E+00 | -1.26E-01 | -1.66E-01 | 4.67E-02 | -1.70E-02 |
| -1.64E-01 | -5.51E-02 | 2.42E-01 | 1.67E+00 | -1.36E-01 | -1.52E-01 | 4.45E-02 | -1.69E-02 |
| -1.04E-01 | -1.17E-01 | 2.65E-01 | 1.65E+00 | -1.44E-01 | -1.37E-01 | 4.23E-02 | -1.67E-02 |
| -5.73E-02 | -1.11E-01 | 2.46E-01 | 1.61E+00 | -1.52E-01 | -1.23E-01 | 4.00E-02 | -1.66E-02 |
| -1.04E-02 | -5.71E-02 | 1.92E-01 | 1.56E+00 | -1.59E-01 | -1.09E-01 | 3.78E-02 | -1.65E-02 |
| 5.23E-02 | 1.61E-02 | 1.14E-01 | 1.49E+00 | -1.66E-01 | -9.50E-02 | 3.55E-02 | -1.64E-02 |
| 1.46E-01 | 7.97E-02 | 2.39E-02 | 1.42E+00 | -1.72E-01 | -8.08E-02 | 3.33E-02 | -1.62E-02 |
| 2.85E-01 | 1.06E-01 | -6.66E-02 | 1.34E+00 | -1.77E-01 | -6.67E-02 | 3.10E-02 | -1.61E-02 |
| 7.49E-02 | 7.94E-02 | -1.48E-01 | 1.25E+00 | -1.81E-01 | -5.26E-02 | 2.87E-02 | -1.60E-02 |
| -1.14E-01 | 1.91E-02 | -2.11E-01 | 1.15E+00 | -1.84E-01 | -3.86E-02 | 2.65E-02 | -1.59E-02 |
| -3.21E-01 | -4.48E-02 | -2.48E-01 | 1.05E+00 | -1.87E-01 | -2.46E-02 | 2.42E-02 | -1.57E-02 |
| 2.24E-01 | -8.69E-02 | -2.50E-01 | 9.39E-01 | -1.90E-01 | -1.07E-02 | 2.19E-02 | -1.56E-02 |
| 2.97E-01 | -9.71E-02 | -2.12E-01 | 8.28E-01 | -1.91E-01 | 3.14E-03 | 1.96E-02 | -1.55E-02 |
| -1.07E-01 | -6.57E-02 | -1.39E-01 | 7.14E-01 | -1.92E-01 | 1.69E-02 | 1.73E-02 | -1.54E-02 |
| -1.53E-01 | -8.91E-03 | -4.59E-02 | 6.00E-01 | -1.93E-01 | 3.06E-02 | 1.50E-02 | -1.52E-02 |
| -2.06E-01 | 5.06E-02 | 5.15E-02 | 4.85E-01 | -1.93E-01 | 4.41E-02 | 1.27E-02 | -1.51E-02 |
| 1.75E-01 | 8.69E-02 | 1.38E-01 | 3.70E-01 | -1.92E-01 | 5.76E-02 | 1.05E-02 | -1.50E-02 |
| -1.51E-01 | 4.84E-02 | 2.01E-01 | 2.58E-01 | -1.91E-01 | 7.10E-02 | 8.17E-03 | -1.48E-02 |
| 2.35E-03 | -3.81E-02 | 2.31E-01 | 1.48E-01 | -1.89E-01 | 8.42E-02 | 5.88E-03 | -1.47E-02 |
| 1.48E-01 | -8.03E-02 | 2.22E-01 | 4.00E-02 | -1.87E-01 | 9.74E-02 | 3.60E-03 | -1.46E-02 |
| -1.72E-01 | -1.83E-02 | 1.70E-01 | -6.45E-02 | -1.84E-01 | 1.10E-01 | 1.31E-03 | -1.45E-02 |
| -7.62E-02 | 5.34E-02 | 8.88E-02 | -1.66E-01 | -1.81E-01 | 1.23E-01 | -9.71E-04 | -1.43E-02 |
| 6.90E-02 | 8.11E-02 | -9.77E-04 | -2.63E-01 | -1.77E-01 | 1.36E-01 | -3.25E-03 | -1.42E-02 |
| 2.76E-01 | 3.32E-02 | -8.15E-02 | -3.56E-01 | -1.73E-01 | 1.49E-01 | -5.53E-03 | -1.41E-02 |
| -2.87E-01 | -7.17E-02 | -1.44E-01 | -4.45E-01 | -1.69E-01 | 1.61E-01 | -7.80E-03 | -1.39E-02 |
| 2.44E-01 | -9.43E-02 | -1.82E-01 | -5.28E-01 | -1.64E-01 | 1.73E-01 | -1.01E-02 | -1.38E-02 |
| 2.50E-01 | -2.76E-02 | -1.91E-01 | -6.07E-01 | -1.58E-01 | 1.85E-01 | -1.23E-02 | -1.37E-02 |
| -2.14E-01 | 8.00E-02 | -1.80E-01 | -6.79E-01 | -1.53E-01 | 1.97E-01 | -1.46E-02 | -1.35E-02 |
| 1.78E-01 | 1.20E-01 | -1.58E-01 | -7.47E-01 | -1.47E-01 | 2.09E-01 | -1.69E-02 | -1.34E-02 |
| -1.52E-01 | 6.96E-02 | -1.34E-01 | -8.09E-01 | -1.40E-01 | 2.21E-01 | -1.91E-02 | -1.33E-02 |
| -2.90E-02 | -3.66E-02 | -1.09E-01 | -8.66E-01 | -1.33E-01 | 2.32E-01 | -2.13E-02 | -1.31E-02 |
| 8.10E-02 | -1.34E-01 | -8.53E-02 | -9.19E-01 | -1.26E-01 | 2.43E-01 | -2.36E-02 | -1.30E-02 |
| 1.29E-01 | -1.71E-01 | -6.37E-02 | -9.68E-01 | -1.19E-01 | 2.54E-01 | -2.58E-02 | -1.29E-02 |
| 1.03E-01 | -1.35E-01 | -4.48E-02 | -1.01E+00 | -1.12E-01 | 2.65E-01 | -2.80E-02 | -1.27E-02 |
| 1.07E-02 | -3.62E-02 | -2.73E-02 | -1.05E+00 | -1.04E-01 | 2.76E-01 | -3.02E-02 | -1.26E-02 |
| -1.32E-01 | 1.10E-01 | -9.40E-03 | -1.09E+00 | -9.56E-02 | 2.86E-01 | -3.24E-02 | -1.25E-02 |
| 1.28E-01 | 2.49E-01 | 1.05E-02 | -1.13E+00 | -8.73E-02 | 2.96E-01 | -3.46E-02 | -1.23E-02 |
| 1.11E-01 | 2.58E-01 | 3.43E-02 | -1.16E+00 | -7.89E-02 | 3.06E-01 | -3.68E-02 | -1.22E-02 |
| -1.23E-01 | 7.50E-02 | 6.22E-02 | -1.19E+00 | -7.02E-02 | 3.16E-01 | -3.90E-02 | -1.20E-02 |
| 1.33E-01 | -1.95E-01 | 8.84E-02 | -1.21E+00 | -6.14E-02 | 3.26E-01 | -4.12E-02 | -1.19E-02 |
| -1.55E-01 | -3.17E-01 | 1.05E-01 | -1.24E+00 | -5.24E-02 | 3.35E-01 | -4.33E-02 | -1.18E-02 |
| 1.88E-01 | -2.52E-01 | 1.07E-01 | -1.26E+00 | -4.33E-02 | 3.44E-01 | -4.55E-02 | -1.16E-02 |
| 4.41E-02 | -8.82E-02 | 9.56E-02 | -1.29E+00 | -3.41E-02 | 3.52E-01 | -4.76E-02 | -1.15E-02 |
| -1.23E-01 | 1.09E-01 | 7.31E-02 | -1.31E+00 | -2.49E-02 | 3.61E-01 | -4.97E-02 | -1.13E-02 |
| -2.62E-01 | 2.87E-01 | 4.19E-02 | -1.33E+00 | -1.55E-02 | 3.69E-01 | -5.18E-02 | -1.12E-02 |
| -3.22E-01 | 3.90E-01 | 4.29E-03 | -1.35E+00 | -6.06E-03 | 3.77E-01 | -5.39E-02 | -1.11E-02 |
| -2.59E-01 | 3.72E-01 | -3.64E-02 | -1.37E+00 | 3.40E-03 | 3.84E-01 | -5.60E-02 | -1.09E-02 |
| 3.40E-01 | 2.15E-01 | -7.29E-02 | -1.39E+00 | 1.29E-02 | 3.92E-01 | -5.80E-02 | -1.08E-02 |
| 2.38E-01 | -5.96E-02 | -9.71E-02 | -1.41E+00 | 2.24E-02 | 3.99E-01 | -6.01E-02 | -1.06E-02 |
| 9.23E-02 | -3.13E-01 | -1.01E-01 | -1.42E+00 | 3.19E-02 | 4.05E-01 | -6.21E-02 | -1.05E-02 |
| -2.75E-01 | -3.76E-01 | -7.62E-02 | -1.43E+00 | 4.13E-02 | 4.12E-01 | -6.41E-02 | -1.03E-02 |
| 2.34E-01 | -1.43E-01 | -2.17E-02 | -1.44E+00 | 5.08E-02 | 4.18E-01 | -6.61E-02 | -1.02E-02 |
| -1.87E-01 | 1.98E-01 | 4.42E-02 | -1.44E+00 | 6.02E-02 | 4.23E-01 | -6.81E-02 | -1.00E-02 |
| 1.66E-02 | 3.18E-01 | 9.79E-02 | -1.43E+00 | 6.95E-02 | 4.29E-01 | -7.00E-02 | -9.90E-03 |
| 9.74E-02 | 1.78E-01 | 1.20E-01 | -1.40E+00 | 7.87E-02 | 4.34E-01 | -7.20E-02 | -9.75E-03 |
| -6.81E-02 | -9.57E-02 | 1.07E-01 | -1.36E+00 | 8.78E-02 | 4.39E-01 | -7.39E-02 | -9.60E-03 |
| 5.90E-02 | -2.41E-01 | 5.95E-02 | -1.31E+00 | 9.68E-02 | 4.43E-01 | -7.58E-02 | -9.45E-03 |
| -7.20E-02 | -1.17E-01 | -1.56E-02 | -1.24E+00 | 1.06E-01 | 4.47E-01 | -7.77E-02 | -9.30E-03 |
| 1.02E-01 | 9.21E-02 | -9.46E-02 | -1.15E+00 | 1.14E-01 | 4.51E-01 | -7.95E-02 | -9.15E-03 |
| -4.11E-02 | 1.77E-01 | -1.49E-01 | -1.05E+00 | 1.23E-01 | 4.54E-01 | -8.14E-02 | -9.00E-03 |
| -1.13E-01 | 1.27E-01 | -1.59E-01 | -9.26E-01 | 1.31E-01 | 4.57E-01 | -8.32E-02 | -8.85E-03 |
| -1.73E-01 | 1.13E-02 | -1.28E-01 | -7.90E-01 | 1.39E-01 | 4.59E-01 | -8.50E-02 | -8.70E-03 |
| -2.80E-01 | -9.83E-02 | -6.78E-02 | -6.41E-01 | 1.47E-01 | 4.62E-01 | -8.68E-02 | -8.54E-03 |
| 3.15E-01 | -1.33E-01 | 9.38E-03 | -4.83E-01 | 1.54E-01 | 4.63E-01 | -8.85E-02 | -8.39E-03 |
| -6.54E-03 | -6.48E-02 | 8.97E-02 | -3.16E-01 | 1.61E-01 | 4.65E-01 | -9.02E-02 | -8.23E-03 |
| -3.60E-01 | 4.46E-02 | 1.57E-01 | -1.46E-01 | 1.68E-01 | 4.66E-01 | -9.20E-02 | -8.08E-03 |
| -2.49E-01 | 1.22E-01 | 1.93E-01 | 2.64E-02 | 1.75E-01 | 4.66E-01 | -9.36E-02 | -7.92E-03 |
| 3.86E-01 | 1.24E-01 | 1.84E-01 | 1.98E-01 | 1.81E-01 | 4.66E-01 | -9.53E-02 | -7.76E-03 |
| -3.50E-02 | 3.08E-02 | 1.25E-01 | 3.65E-01 | 1.87E-01 | 4.66E-01 | -9.69E-02 | -7.61E-03 |
| -3.97E-01 | -8.30E-02 | 3.53E-02 | 5.25E-01 | 1.92E-01 | 4.65E-01 | -9.85E-02 | -7.45E-03 |
| 3.91E-01 | -1.24E-01 | -6.14E-02 | 6.76E-01 | 1.97E-01 | 4.64E-01 | -1.00E-01 | -7.29E-03 |
| -1.47E-01 | -4.74E-02 | -1.43E-01 | 8.16E-01 | 2.02E-01 | 4.63E-01 | -1.02E-01 | -7.13E-03 |
| -3.43E-01 | 7.35E-02 | -1.95E-01 | 9.43E-01 | 2.06E-01 | 4.60E-01 | -1.03E-01 | -6.97E-03 |
| 2.99E-01 | 1.31E-01 | -2.02E-01 | 1.05E+00 | 2.09E-01 | 4.58E-01 | -1.05E-01 | -6.80E-03 |
| 2.42E-01 | 4.58E-02 | -1.56E-01 | 1.15E+00 | 2.12E-01 | 4.55E-01 | -1.06E-01 | -6.64E-03 |
| -1.84E-01 | -9.14E-02 | -7.50E-02 | 1.23E+00 | 2.15E-01 | 4.52E-01 | -1.08E-01 | -6.48E-03 |
| 1.27E-01 | -1.54E-01 | 1.78E-02 | 1.30E+00 | 2.17E-01 | 4.48E-01 | -1.09E-01 | -6.31E-03 |
| -8.31E-02 | -6.96E-02 | 9.87E-02 | 1.35E+00 | 2.18E-01 | 4.44E-01 | -1.11E-01 | -6.15E-03 |
| 6.16E-02 | 1.05E-01 | 1.55E-01 | 1.38E+00 | 2.19E-01 | 4.39E-01 | -1.12E-01 | -5.98E-03 |
| -6.63E-02 | 2.04E-01 | 1.78E-01 | 1.39E+00 | 2.19E-01 | 4.34E-01 | -1.13E-01 | -5.81E-03 |
| 9.34E-02 | 7.41E-02 | 1.60E-01 | 1.39E+00 | 2.18E-01 | 4.28E-01 | -1.15E-01 | -5.65E-03 |
| -1.30E-03 | -1.55E-01 | 1.12E-01 | 1.36E+00 | 2.16E-01 | 4.23E-01 | -1.16E-01 | -5.48E-03 |
| -1.76E-01 | -2.72E-01 | 4.80E-02 | 1.33E+00 | 2.14E-01 | 4.16E-01 | -1.17E-01 | -5.31E-03 |
| 2.12E-01 | -1.30E-01 | -1.86E-02 | 1.28E+00 | 2.11E-01 | 4.10E-01 | -1.19E-01 | -5.14E-03 |
| 7.80E-02 | 1.38E-01 | -7.68E-02 | 1.21E+00 | 2.08E-01 | 4.03E-01 | -1.20E-01 | -4.97E-03 |
| 5.29E-03 | 3.39E-01 | -1.16E-01 | 1.14E+00 | 2.04E-01 | 3.96E-01 | -1.21E-01 | -4.79E-03 |
| -2.33E-01 | 2.87E-01 | -1.28E-01 | 1.05E+00 | 2.00E-01 | 3.88E-01 | -1.22E-01 | -4.62E-03 |
| 2.08E-01 | -5.46E-02 | -1.17E-01 | 9.53E-01 | 1.94E-01 | 3.80E-01 | -1.23E-01 | -4.45E-03 |
| -1.72E-01 | -3.90E-01 | -8.72E-02 | 8.49E-01 | 1.89E-01 | 3.72E-01 | -1.25E-01 | -4.27E-03 |
| -8.18E-02 | -3.97E-01 | -4.50E-02 | 7.39E-01 | 1.83E-01 | 3.63E-01 | -1.26E-01 | -4.09E-03 |
| 1.29E-01 | -1.22E-01 | 2.60E-03 | 6.24E-01 | 1.76E-01 | 3.54E-01 | -1.27E-01 | -3.92E-03 |
| -1.48E-01 | 2.47E-01 | 4.66E-02 | 5.06E-01 | 1.69E-01 | 3.45E-01 | -1.28E-01 | -3.74E-03 |
| 2.02E-01 | 4.07E-01 | 7.72E-02 | 3.86E-01 | 1.62E-01 | 3.36E-01 | -1.29E-01 | -3.56E-03 |
| -3.87E-01 | 3.20E-01 | 8.71E-02 | 2.65E-01 | 1.54E-01 | 3.26E-01 | -1.30E-01 | -3.38E-03 |
| -4.19E-01 | 9.83E-02 | 7.84E-02 | 1.45E-01 | 1.45E-01 | 3.16E-01 | -1.31E-01 | -3.20E-03 |
| -4.33E-01 | -1.29E-01 | 5.63E-02 | 2.61E-02 | 1.37E-01 | 3.06E-01 | -1.32E-01 | -3.02E-03 |
| 2.70E-01 | -2.63E-01 | 2.62E-02 | -9.09E-02 | 1.28E-01 | 2.96E-01 | -1.33E-01 | -2.84E-03 |
| 5.00E-01 | -3.25E-01 | -6.37E-03 | -2.06E-01 | 1.18E-01 | 2.85E-01 | -1.34E-01 | -2.65E-03 |
| 2.83E-01 | -3.47E-01 | -3.61E-02 | -3.18E-01 | 1.09E-01 | 2.74E-01 | -1.35E-01 | -2.47E-03 |
| -4.26E-01 | -2.89E-01 | -5.83E-02 | -4.27E-01 | 9.89E-02 | 2.63E-01 | -1.36E-01 | -2.28E-03 |
| -5.74E-02 | -1.15E-01 | -7.06E-02 | -5.34E-01 | 8.88E-02 | 2.52E-01 | -1.37E-01 | -2.09E-03 |
| 2.59E-01 | 9.69E-02 | -7.22E-02 | -6.36E-01 | 7.84E-02 | 2.40E-01 | -1.38E-01 | -1.91E-03 |
| -1.77E-01 | 2.43E-01 | -6.24E-02 | -7.34E-01 | 6.79E-02 | 2.29E-01 | -1.38E-01 | -1.72E-03 |
| -8.91E-02 | 2.50E-01 | -4.13E-02 | -8.28E-01 | 5.72E-02 | 2.17E-01 | -1.39E-01 | -1.53E-03 |
| 8.77E-02 | 1.55E-01 | -1.13E-02 | -9.16E-01 | 4.64E-02 | 2.05E-01 | -1.40E-01 | -1.34E-03 |
| -9.54E-02 | 8.87E-03 | 2.20E-02 | -9.99E-01 | 3.55E-02 | 1.93E-01 | -1.41E-01 | -1.14E-03 |
| 1.33E-01 | -1.50E-01 | 5.31E-02 | -1.08E+00 | 2.44E-02 | 1.81E-01 | -1.41E-01 | -9.50E-04 |
| -1.78E-01 | -1.72E-01 | 7.59E-02 | -1.14E+00 | 1.33E-02 | 1.69E-01 | -1.42E-01 | -7.56E-04 |
| 2.05E-01 | -7.60E-02 | 8.58E-02 | -1.21E+00 | 2.18E-03 | 1.56E-01 | -1.43E-01 | -5.61E-04 |
| -2.01E-01 | 9.52E-03 | 8.17E-02 | -1.26E+00 | -9.01E-03 | 1.44E-01 | -1.43E-01 | -3.64E-04 |
| 1.72E-01 | 1.26E-01 | 6.35E-02 | -1.31E+00 | -2.02E-02 | 1.31E-01 | -1.44E-01 | -1.67E-04 |
| -1.39E-01 | 1.26E-01 | 3.23E-02 | -1.34E+00 | -3.13E-02 | 1.19E-01 | -1.45E-01 | 3.19E-05 |
| 1.20E-01 | -4.49E-02 | -6.13E-03 | -1.37E+00 | -4.25E-02 | 1.06E-01 | -1.45E-01 | 2.32E-04 |
| -1.22E-01 | -1.27E-01 | -4.62E-02 | -1.38E+00 | -5.35E-02 | 9.34E-02 | -1.46E-01 | 4.33E-04 |
| -1.39E-01 | -4.64E-02 | -8.24E-02 | -1.38E+00 | -6.44E-02 | 8.07E-02 | -1.46E-01 | 6.35E-04 |
| 1.68E-01 | 8.89E-02 | -1.09E-01 | -1.37E+00 | -7.53E-02 | 6.79E-02 | -1.47E-01 | 8.38E-04 |
| 1.08E-01 | 1.60E-01 | -1.19E-01 | -1.35E+00 | -8.59E-02 | 5.50E-02 | -1.47E-01 | 1.04E-03 |
| 1.06E-01 | 1.40E-01 | -1.09E-01 | -1.31E+00 | -9.65E-02 | 4.22E-02 | -1.48E-01 | 1.25E-03 |
| -2.49E-01 | 3.92E-02 | -7.87E-02 | -1.27E+00 | -1.07E-01 | 2.94E-02 | -1.48E-01 | 1.45E-03 |
| -1.88E-01 | -9.98E-02 | -3.64E-02 | -1.21E+00 | -1.17E-01 | 1.66E-02 | -1.48E-01 | 1.66E-03 |
| 2.50E-01 | -2.28E-01 | 1.12E-02 | -1.14E+00 | -1.27E-01 | 3.77E-03 | -1.49E-01 | 1.87E-03 |
| -2.26E-01 | -2.56E-01 | 5.75E-02 | -1.06E+00 | -1.37E-01 | -9.00E-03 | -1.49E-01 | 2.08E-03 |
| -2.34E-02 | -1.63E-01 | 9.90E-02 | -9.76E-01 | -1.46E-01 | -2.17E-02 | -1.50E-01 | 2.29E-03 |
| 1.56E-01 | -4.70E-02 | 1.33E-01 | -8.81E-01 | -1.55E-01 | -3.44E-02 | -1.50E-01 | 2.51E-03 |
| 4.06E-03 | 4.81E-04 | 1.56E-01 | -7.79E-01 | -1.64E-01 | -4.70E-02 | -1.50E-01 | 2.72E-03 |
| -1.14E-01 | 2.10E-02 | 1.65E-01 | -6.69E-01 | -1.73E-01 | -5.95E-02 | -1.50E-01 | 2.93E-03 |
| 1.20E-01 | 1.02E-01 | 1.58E-01 | -5.54E-01 | -1.81E-01 | -7.20E-02 | -1.51E-01 | 3.15E-03 |
| -1.42E-01 | 2.91E-01 | 1.31E-01 | -4.35E-01 | -1.89E-01 | -8.43E-02 | -1.51E-01 | 3.37E-03 |
| 1.64E-01 | 3.32E-01 | 8.34E-02 | -3.11E-01 | -1.97E-01 | -9.66E-02 | -1.51E-01 | 3.59E-03 |
| -3.77E-02 | 9.35E-02 | 1.53E-02 | -1.86E-01 | -2.04E-01 | -1.09E-01 | -1.51E-01 | 3.81E-03 |
| -1.75E-01 | -2.03E-01 | -6.01E-02 | -5.96E-02 | -2.11E-01 | -1.21E-01 | -1.51E-01 | 4.03E-03 |
| -1.07E-01 | -3.12E-01 | -1.27E-01 | 6.62E-02 | -2.17E-01 | -1.33E-01 | -1.51E-01 | 4.25E-03 |
| 1.38E-01 | -2.16E-01 | -1.74E-01 | 1.91E-01 | -2.23E-01 | -1.44E-01 | -1.51E-01 | 4.47E-03 |
| -1.14E-01 | -4.42E-02 | -1.98E-01 | 3.13E-01 | -2.29E-01 | -1.56E-01 | -1.51E-01 | 4.70E-03 |
| 9.66E-02 | 4.76E-02 | -2.01E-01 | 4.32E-01 | -2.34E-01 | -1.67E-01 | -1.51E-01 | 4.93E-03 |
| -9.14E-02 | 1.20E-01 | -1.84E-01 | 5.47E-01 | -2.39E-01 | -1.78E-01 | -1.51E-01 | 5.15E-03 |
| 9.96E-02 | 2.00E-01 | -1.50E-01 | 6.58E-01 | -2.43E-01 | -1.90E-01 | -1.51E-01 | 5.38E-03 |
| -6.12E-02 | 2.18E-01 | -9.79E-02 | 7.64E-01 | -2.47E-01 | -2.00E-01 | -1.51E-01 | 5.61E-03 |
| -1.55E-01 | 1.60E-01 | -3.17E-02 | 8.63E-01 | -2.50E-01 | -2.11E-01 | -1.51E-01 | 5.84E-03 |
| 2.02E-01 | 5.21E-02 | 4.10E-02 | 9.56E-01 | -2.53E-01 | -2.21E-01 | -1.51E-01 | 6.08E-03 |
| 1.51E-01 | -3.92E-02 | 1.10E-01 | 1.04E+00 | -2.55E-01 | -2.32E-01 | -1.51E-01 | 6.31E-03 |
| 8.81E-02 | -9.72E-02 | 1.65E-01 | 1.12E+00 | -2.57E-01 | -2.41E-01 | -1.51E-01 | 6.54E-03 |
| -3.68E-01 | -1.34E-01 | 1.99E-01 | 1.19E+00 | -2.58E-01 | -2.51E-01 | -1.51E-01 | 6.78E-03 |
| 4.09E-01 | -1.60E-01 | 2.04E-01 | 1.24E+00 | -2.58E-01 | -2.61E-01 | -1.51E-01 | 7.02E-03 |
| -3.02E-03 | -1.59E-01 | 1.73E-01 | 1.29E+00 | -2.58E-01 | -2.70E-01 | -1.50E-01 | 7.26E-03 |
| -4.33E-01 | -9.46E-02 | 1.04E-01 | 1.33E+00 | -2.57E-01 | -2.79E-01 | -1.50E-01 | 7.50E-03 |
| -9.83E-02 | 3.84E-02 | 1.38E-02 | 1.36E+00 | -2.56E-01 | -2.87E-01 | -1.50E-01 | 7.74E-03 |
| 2.62E-01 | 1.53E-01 | -7.68E-02 | 1.39E+00 | -2.54E-01 | -2.95E-01 | -1.49E-01 | 7.98E-03 |
| 3.31E-01 | 1.41E-01 | -1.47E-01 | 1.40E+00 | -2.51E-01 | -3.03E-01 | -1.49E-01 | 8.22E-03 |
| -2.75E-01 | -2.84E-02 | -1.83E-01 | 1.41E+00 | -2.47E-01 | -3.11E-01 | -1.49E-01 | 8.47E-03 |
| 2.22E-01 | -1.35E-01 | -1.75E-01 | 1.42E+00 | -2.43E-01 | -3.18E-01 | -1.48E-01 | 8.71E-03 |
| 5.98E-02 | -3.14E-02 | -1.16E-01 | 1.42E+00 | -2.38E-01 | -3.25E-01 | -1.48E-01 | 8.96E-03 |
| -1.64E-01 | 1.08E-01 | -2.90E-02 | 1.42E+00 | -2.32E-01 | -3.32E-01 | -1.48E-01 | 9.21E-03 |
| 1.69E-01 | 9.41E-02 | 6.00E-02 | 1.41E+00 | -2.26E-01 | -3.39E-01 | -1.47E-01 | 9.46E-03 |
| -1.91E-01 | -7.52E-03 | 1.27E-01 | 1.40E+00 | -2.19E-01 | -3.45E-01 | -1.47E-01 | 9.71E-03 |
| 2.38E-01 | -5.72E-02 | 1.58E-01 | 1.39E+00 | -2.11E-01 | -3.51E-01 | -1.46E-01 | 9.96E-03 |
| 2.44E-01 | -4.35E-02 | 1.47E-01 | 1.38E+00 | -2.02E-01 | -3.56E-01 | -1.46E-01 | 1.02E-02 |
| 2.58E-01 | -3.82E-03 | 1.03E-01 | 1.36E+00 | -1.93E-01 | -3.62E-01 | -1.45E-01 | 1.05E-02 |
| 3.07E-01 | 2.15E-02 | 4.13E-02 | 1.35E+00 | -1.83E-01 | -3.67E-01 | -1.44E-01 | 1.07E-02 |
| -1.37E-04 | 8.66E-03 | -2.57E-02 | 1.33E+00 | -1.73E-01 | -3.71E-01 | -1.44E-01 | 1.10E-02 |
| -3.03E-01 | -1.30E-02 | -8.53E-02 | 1.30E+00 | -1.62E-01 | -3.76E-01 | -1.43E-01 | 1.12E-02 |
| -2.41E-01 | -1.11E-02 | -1.27E-01 | 1.27E+00 | -1.51E-01 | -3.80E-01 | -1.42E-01 | 1.15E-02 |
| -2.15E-01 | 6.63E-03 | -1.43E-01 | 1.23E+00 | -1.39E-01 | -3.84E-01 | -1.42E-01 | 1.18E-02 |
| 1.93E-01 | 2.36E-02 | -1.34E-01 | 1.19E+00 | -1.27E-01 | -3.87E-01 | -1.41E-01 | 1.20E-02 |
| 1.97E-01 | 2.52E-02 | -1.02E-01 | 1.14E+00 | -1.14E-01 | -3.90E-01 | -1.40E-01 | 1.23E-02 |
| -1.88E-01 | -4.51E-04 | -5.11E-02 | 1.09E+00 | -1.01E-01 | -3.93E-01 | -1.40E-01 | 1.25E-02 |
| -1.61E-01 | -4.15E-02 | 1.15E-02 | 1.03E+00 | -8.84E-02 | -3.96E-01 | -1.39E-01 | 1.28E-02 |
| 2.21E-01 | -2.96E-02 | 7.36E-02 | 9.65E-01 | -7.50E-02 | -3.99E-01 | -1.38E-01 | 1.31E-02 |
| -2.56E-01 | 5.25E-02 | 1.24E-01 | 8.95E-01 | -6.15E-02 | -4.01E-01 | -1.37E-01 | 1.33E-02 |
| -2.46E-01 | 7.75E-02 | 1.53E-01 | 8.18E-01 | -4.78E-02 | -4.03E-01 | -1.36E-01 | 1.36E-02 |
| 3.04E-01 | -6.01E-04 | 1.52E-01 | 7.36E-01 | -3.40E-02 | -4.04E-01 | -1.35E-01 | 1.39E-02 |
| -2.88E-01 | -1.09E-01 | 1.20E-01 | 6.49E-01 | -2.00E-02 | -4.06E-01 | -1.34E-01 | 1.41E-02 |
| 1.78E-01 | -3.85E-02 | 6.40E-02 | 5.58E-01 | -6.05E-03 | -4.07E-01 | -1.33E-01 | 1.44E-02 |
| 1.80E-01 | 1.09E-01 | -4.42E-03 | 4.63E-01 | 7.96E-03 | -4.08E-01 | -1.32E-01 | 1.47E-02 |
| -1.25E-01 | 1.60E-01 | -6.99E-02 | 3.65E-01 | 2.20E-02 | -4.08E-01 | -1.31E-01 | 1.50E-02 |
| 9.88E-02 | 7.40E-02 | -1.23E-01 | 2.65E-01 | 3.59E-02 | -4.09E-01 | -1.30E-01 | 1.52E-02 |
| -1.11E-01 | 4.66E-03 | -1.60E-01 | 1.64E-01 | 4.98E-02 | -4.09E-01 | -1.29E-01 | 1.55E-02 |
| 5.97E-02 | -6.00E-02 | -1.80E-01 | 6.28E-02 | 6.35E-02 | -4.09E-01 | -1.28E-01 | 1.58E-02 |
| 2.23E-01 | -1.36E-01 | -1.81E-01 | -3.81E-02 | 7.71E-02 | -4.08E-01 | -1.27E-01 | 1.61E-02 |
| -3.43E-02 | -2.15E-01 | -1.62E-01 | -1.38E-01 | 9.05E-02 | -4.08E-01 | -1.26E-01 | 1.64E-02 |
| -3.62E-01 | -2.47E-01 | -1.22E-01 | -2.37E-01 | 1.04E-01 | -4.07E-01 | -1.25E-01 | 1.66E-02 |
| -4.14E-01 | -1.72E-01 | -6.20E-02 | -3.35E-01 | 1.17E-01 | -4.05E-01 | -1.24E-01 | 1.69E-02 |
| -1.89E-01 | 1.52E-02 | 9.16E-03 | -4.32E-01 | 1.29E-01 | -4.04E-01 | -1.22E-01 | 1.72E-02 |
| 4.38E-01 | 2.01E-01 | 8.10E-02 | -5.28E-01 | 1.41E-01 | -4.02E-01 | -1.21E-01 | 1.75E-02 |
| -1.99E-02 | 2.73E-01 | 1.43E-01 | -6.22E-01 | 1.53E-01 | -4.01E-01 | -1.20E-01 | 1.78E-02 |
| -3.54E-01 | 2.39E-01 | 1.87E-01 | -7.14E-01 | 1.65E-01 | -3.98E-01 | -1.19E-01 | 1.81E-02 |
| -1.98E-01 | 1.36E-01 | 2.08E-01 | -8.03E-01 | 1.76E-01 | -3.96E-01 | -1.17E-01 | 1.83E-02 |
| -6.11E-03 | 1.44E-02 | 2.09E-01 | -8.90E-01 | 1.86E-01 | -3.93E-01 | -1.16E-01 | 1.86E-02 |
| 1.63E-01 | -7.00E-02 | 1.93E-01 | -9.73E-01 | 1.96E-01 | -3.91E-01 | -1.15E-01 | 1.89E-02 |
| -1.25E-01 | -8.88E-02 | 1.63E-01 | -1.05E+00 | 2.05E-01 | -3.87E-01 | -1.13E-01 | 1.92E-02 |
| -1.13E-02 | -1.01E-01 | 1.22E-01 | -1.13E+00 | 2.14E-01 | -3.84E-01 | -1.12E-01 | 1.95E-02 |
| 1.19E-01 | -1.26E-01 | 7.31E-02 | -1.20E+00 | 2.22E-01 | -3.81E-01 | -1.10E-01 | 1.98E-02 |
| -1.40E-01 | -1.64E-01 | 1.86E-02 | -1.26E+00 | 2.30E-01 | -3.77E-01 | -1.09E-01 | 2.01E-02 |
| 1.23E-04 | -2.03E-01 | -3.83E-02 | -1.32E+00 | 2.37E-01 | -3.73E-01 | -1.08E-01 | 2.04E-02 |
| 1.25E-01 | -2.34E-01 | -9.45E-02 | -1.37E+00 | 2.43E-01 | -3.69E-01 | -1.06E-01 | 2.07E-02 |
| 2.22E-01 | -2.49E-01 | -1.47E-01 | -1.41E+00 | 2.48E-01 | -3.64E-01 | -1.05E-01 | 2.10E-02 |
| 2.81E-01 | -2.40E-01 | -1.93E-01 | -1.44E+00 | 2.52E-01 | -3.60E-01 | -1.03E-01 | 2.13E-02 |
| 2.90E-01 | -1.99E-01 | -2.29E-01 | -1.46E+00 | 2.56E-01 | -3.55E-01 | -1.02E-01 | 2.16E-02 |
| 2.35E-01 | -1.19E-01 | -2.50E-01 | -1.48E+00 | 2.59E-01 | -3.50E-01 | -1.00E-01 | 2.19E-02 |
| -3.04E-01 | 1.26E-02 | -2.50E-01 | -1.48E+00 | 2.60E-01 | -3.44E-01 | -9.86E-02 | 2.22E-02 |
| 2.95E-01 | 1.76E-01 | -2.25E-01 | -1.47E+00 | 2.61E-01 | -3.39E-01 | -9.70E-02 | 2.25E-02 |
| -2.48E-01 | 2.35E-01 | -1.70E-01 | -1.45E+00 | 2.61E-01 | -3.33E-01 | -9.54E-02 | 2.28E-02 |
| -2.58E-01 | 1.21E-01 | -8.23E-02 | -1.42E+00 | 2.60E-01 | -3.27E-01 | -9.38E-02 | 2.31E-02 |
| 2.38E-01 | -1.29E-01 | 2.34E-02 | -1.38E+00 | 2.58E-01 | -3.21E-01 | -9.22E-02 | 2.34E-02 |
| -2.17E-01 | -2.41E-01 | 1.28E-01 | -1.32E+00 | 2.55E-01 | -3.14E-01 | -9.05E-02 | 2.37E-02 |
| -1.01E-01 | -1.15E-01 | 2.14E-01 | -1.26E+00 | 2.51E-01 | -3.08E-01 | -8.89E-02 | 2.40E-02 |
| -6.46E-02 | 1.12E-01 | 2.68E-01 | -1.17E+00 | 2.47E-01 | -3.01E-01 | -8.72E-02 | 2.43E-02 |
| 8.86E-02 | 2.53E-01 | 2.76E-01 | -1.08E+00 | 2.41E-01 | -2.94E-01 | -8.55E-02 | 2.46E-02 |
| 1.09E-01 | 1.64E-01 | 2.33E-01 | -9.70E-01 | 2.35E-01 | -2.87E-01 | -8.38E-02 | 2.49E-02 |
| -7.92E-02 | -9.25E-02 | 1.51E-01 | -8.48E-01 | 2.28E-01 | -2.80E-01 | -8.21E-02 | 2.53E-02 |
| 5.97E-02 | -2.65E-01 | 5.00E-02 | -7.15E-01 | 2.21E-01 | -2.72E-01 | -8.04E-02 | 2.56E-02 |
| -6.36E-02 | -1.84E-01 | -5.15E-02 | -5.74E-01 | 2.13E-01 | -2.64E-01 | -7.86E-02 | 2.59E-02 |
| 9.66E-02 | -2.25E-03 | -1.42E-01 | -4.24E-01 | 2.04E-01 | -2.56E-01 | -7.69E-02 | 2.62E-02 |
| -1.50E-01 | 1.59E-01 | -2.13E-01 | -2.69E-01 | 1.94E-01 | -2.48E-01 | -7.51E-02 | 2.65E-02 |
| 3.20E-02 | 2.64E-01 | -2.58E-01 | -1.08E-01 | 1.84E-01 | -2.40E-01 | -7.34E-02 | 2.68E-02 |
| 2.68E-01 | 2.79E-01 | -2.72E-01 | 5.63E-02 | 1.74E-01 | -2.32E-01 | -7.16E-02 | 2.72E-02 |
| 1.73E-01 | 1.85E-01 | -2.48E-01 | 2.23E-01 | 1.63E-01 | -2.23E-01 | -6.98E-02 | 2.75E-02 |
| 1.09E-01 | 3.14E-02 | -1.97E-01 | 3.89E-01 | 1.51E-01 | -2.14E-01 | -6.79E-02 | 2.78E-02 |
| -3.72E-01 | -1.19E-01 | -1.29E-01 | 5.52E-01 | 1.39E-01 | -2.06E-01 | -6.61E-02 | 2.81E-02 |
| -9.99E-02 | -2.19E-01 | -5.48E-02 | 7.09E-01 | 1.26E-01 | -1.97E-01 | -6.43E-02 | 2.84E-02 |
| 1.32E-01 | -2.66E-01 | 1.61E-02 | 8.57E-01 | 1.13E-01 | -1.88E-01 | -6.24E-02 | 2.88E-02 |
| 3.45E-01 | -2.72E-01 | 7.71E-02 | 9.93E-01 | 9.99E-02 | -1.78E-01 | -6.06E-02 | 2.91E-02 |
| 1.55E-01 | -2.50E-01 | 1.26E-01 | 1.11E+00 | 8.62E-02 | -1.69E-01 | -5.87E-02 | 2.94E-02 |
| -3.96E-02 | -1.92E-01 | 1.61E-01 | 1.22E+00 | 7.22E-02 | -1.60E-01 | -5.68E-02 | 2.98E-02 |
| -2.45E-01 | -8.69E-02 | 1.81E-01 | 1.30E+00 | 5.80E-02 | -1.51E-01 | -5.50E-02 | 3.01E-02 |
| -5.34E-02 | 6.15E-02 | 1.84E-01 | 1.36E+00 | 4.35E-02 | -1.41E-01 | -5.31E-02 | 3.04E-02 |
| 2.02E-01 | 1.90E-01 | 1.68E-01 | 1.40E+00 | 2.89E-02 | -1.32E-01 | -5.12E-02 | 3.07E-02 |
| -2.03E-01 | 2.21E-01 | 1.28E-01 | 1.42E+00 | 1.40E-02 | -1.22E-01 | -4.93E-02 | 3.11E-02 |
| -2.08E-02 | 1.05E-01 | 6.89E-02 | 1.41E+00 | -9.37E-04 | -1.13E-01 | -4.73E-02 | 3.14E-02 |
| 2.46E-01 | -7.27E-02 | 3.58E-03 | 1.39E+00 | -1.60E-02 | -1.03E-01 | -4.54E-02 | 3.17E-02 |
| 3.89E-02 | -1.75E-01 | -5.13E-02 | 1.36E+00 | -3.11E-02 | -9.35E-02 | -4.35E-02 | 3.21E-02 |
| -3.05E-01 | -1.53E-01 | -8.27E-02 | 1.31E+00 | -4.62E-02 | -8.40E-02 | -4.15E-02 | 3.24E-02 |
| 1.50E-02 | -7.46E-03 | -9.03E-02 | 1.26E+00 | -6.12E-02 | -7.45E-02 | -3.96E-02 | 3.27E-02 |
| 3.32E-01 | 1.26E-01 | -7.72E-02 | 1.20E+00 | -7.62E-02 | -6.50E-02 | -3.77E-02 | 3.31E-02 |
| -2.96E-02 | 1.20E-01 | -4.75E-02 | 1.14E+00 | -9.10E-02 | -5.56E-02 | -3.57E-02 | 3.34E-02 |
| -3.10E-01 | 2.21E-02 | -9.02E-03 | 1.08E+00 | -1.06E-01 | -4.62E-02 | -3.37E-02 | 3.38E-02 |
| 2.12E-01 | -7.46E-02 | 2.51E-02 | 1.03E+00 | -1.20E-01 | -3.68E-02 | -3.18E-02 | 3.41E-02 |
| 2.61E-01 | -8.99E-02 | 4.01E-02 | 9.79E-01 | -1.34E-01 | -2.76E-02 | -2.98E-02 | 3.44E-02 |
| -1.93E-01 | 1.04E-02 | 2.73E-02 | 9.46E-01 | -1.48E-01 | -1.84E-02 | -2.78E-02 | 3.48E-02 |
| -2.31E-01 | 9.93E-02 | 1.87E-03 | 9.22E-01 | -1.61E-01 | -9.32E-03 | -2.59E-02 | 3.51E-02 |
| 2.36E-01 | 7.16E-02 | -1.81E-02 | 9.07E-01 | -1.74E-01 | -3.41E-04 | -2.39E-02 | 3.55E-02 |
| -2.03E-02 | -5.37E-02 | -2.71E-02 | 8.97E-01 | -1.87E-01 | 8.53E-03 | -2.19E-02 | 3.58E-02 |
| -2.94E-01 | -1.76E-01 | -2.30E-02 | 8.88E-01 | -1.99E-01 | 1.73E-02 | -1.99E-02 | 3.62E-02 |
| -2.98E-01 | -1.79E-01 | -5.74E-03 | 8.78E-01 | -2.10E-01 | 2.59E-02 | -1.79E-02 | 3.65E-02 |
| 3.11E-01 | 6.72E-03 | 1.71E-02 | 8.65E-01 | -2.21E-01 | 3.43E-02 | -1.59E-02 | 3.69E-02 |
| -3.07E-01 | 2.21E-01 | 3.66E-02 | 8.46E-01 | -2.31E-01 | 4.27E-02 | -1.39E-02 | 3.72E-02 |
| 7.00E-02 | 2.64E-01 | 4.41E-02 | 8.19E-01 | -2.40E-01 | 5.08E-02 | -1.19E-02 | 3.76E-02 |
| 2.55E-01 | 1.24E-01 | 3.35E-02 | 7.83E-01 | -2.49E-01 | 5.88E-02 | -9.93E-03 | 3.79E-02 |
| -2.20E-01 | -1.36E-01 | 9.91E-03 | 7.36E-01 | -2.57E-01 | 6.66E-02 | -7.94E-03 | 3.83E-02 |
| 5.85E-02 | -3.32E-01 | -1.92E-02 | 6.79E-01 | -2.64E-01 | 7.42E-02 | -5.94E-03 | 3.86E-02 |
| 1.67E-01 | -3.48E-01 | -4.75E-02 | 6.12E-01 | -2.70E-01 | 8.15E-02 | -3.94E-03 | 3.90E-02 |
| 5.10E-02 | -1.39E-01 | -7.01E-02 | 5.37E-01 | -2.76E-01 | 8.87E-02 | -1.95E-03 | 3.93E-02 |
| -1.58E-01 | 1.64E-01 | -8.66E-02 | 4.55E-01 | -2.80E-01 | 9.57E-02 | 4.81E-05 | 3.97E-02 |
| 1.65E-01 | 3.36E-01 | -9.78E-02 | 3.67E-01 | -2.83E-01 | 1.02E-01 | 2.04E-03 | 4.01E-02 |
| -1.65E-01 | 3.56E-01 | -1.04E-01 | 2.75E-01 | -2.86E-01 | 1.09E-01 | 4.04E-03 | 4.04E-02 |
| -5.21E-02 | 3.35E-01 | -1.08E-01 | 1.80E-01 | -2.87E-01 | 1.15E-01 | 6.03E-03 | 4.08E-02 |
| 1.32E-01 | 2.39E-01 | -1.08E-01 | 8.26E-02 | -2.87E-01 | 1.21E-01 | 8.02E-03 | 4.11E-02 |
| 2.14E-02 | 3.19E-02 | -1.03E-01 | -1.56E-02 | -2.85E-01 | 1.27E-01 | 1.00E-02 | 4.15E-02 |
| -8.44E-02 | -1.88E-01 | -9.18E-02 | -1.14E-01 | -2.83E-01 | 1.32E-01 | 1.20E-02 | 4.19E-02 |
| 8.01E-02 | -2.86E-01 | -7.22E-02 | -2.11E-01 | -2.79E-01 | 1.37E-01 | 1.40E-02 | 4.22E-02 |
| 2.67E-02 | -1.77E-01 | -4.37E-02 | -3.08E-01 | -2.74E-01 | 1.42E-01 | 1.59E-02 | 4.26E-02 |
| -1.34E-01 | 2.95E-02 | -8.42E-03 | -4.02E-01 | -2.68E-01 | 1.47E-01 | 1.79E-02 | 4.30E-02 |
| 1.82E-01 | 1.53E-01 | 3.00E-02 | -4.92E-01 | -2.60E-01 | 1.52E-01 | 1.99E-02 | 4.33E-02 |
| -2.29E-01 | 1.94E-01 | 6.81E-02 | -5.78E-01 | -2.51E-01 | 1.56E-01 | 2.19E-02 | 4.37E-02 |
| 1.89E-01 | 2.07E-01 | 1.02E-01 | -6.58E-01 | -2.41E-01 | 1.60E-01 | 2.38E-02 | 4.41E-02 |
| 2.88E-01 | 1.36E-01 | 1.28E-01 | -7.30E-01 | -2.29E-01 | 1.64E-01 | 2.58E-02 | 4.44E-02 |
| -2.99E-01 | -4.87E-02 | 1.41E-01 | -7.93E-01 | -2.16E-01 | 1.67E-01 | 2.77E-02 | 4.48E-02 |
| 2.81E-01 | -1.86E-01 | 1.33E-01 | -8.48E-01 | -2.01E-01 | 1.71E-01 | 2.97E-02 | 4.52E-02 |
| 3.11E-01 | -1.62E-01 | 1.03E-01 | -8.92E-01 | -1.85E-01 | 1.74E-01 | 3.16E-02 | 4.55E-02 |
| -2.30E-01 | 3.64E-02 | 5.43E-02 | -9.27E-01 | -1.67E-01 | 1.77E-01 | 3.35E-02 | 4.59E-02 |
| -3.29E-01 | 1.89E-01 | -1.03E-03 | -9.51E-01 | -1.48E-01 | 1.80E-01 | 3.55E-02 | 4.63E-02 |
| -2.64E-01 | 1.62E-01 | -5.23E-02 | -9.63E-01 | -1.27E-01 | 1.83E-01 | 3.74E-02 | 4.67E-02 |
| 3.25E-01 | -1.10E-02 | -9.25E-02 | -9.64E-01 | -1.04E-01 | 1.85E-01 | 3.93E-02 | 4.70E-02 |
| -2.95E-01 | -2.11E-01 | -1.16E-01 | -9.52E-01 | -8.04E-02 | 1.88E-01 | 4.12E-02 | 4.74E-02 |
| 4.22E-02 | -1.98E-01 | -1.18E-01 | -9.28E-01 | -5.55E-02 | 1.90E-01 | 4.31E-02 | 4.78E-02 |
| 1.82E-01 | -1.74E-02 | -1.02E-01 | -8.93E-01 | -2.97E-02 | 1.92E-01 | 4.50E-02 | 4.82E-02 |
| -1.25E-01 | 1.87E-01 | -7.45E-02 | -8.48E-01 | -3.30E-03 | 1.94E-01 | 4.68E-02 | 4.85E-02 |
| 8.57E-02 | 2.61E-01 | -4.14E-02 | -7.95E-01 | 2.36E-02 | 1.96E-01 | 4.87E-02 | 4.89E-02 |
| -2.17E-02 | 2.43E-01 | -8.54E-03 | -7.34E-01 | 5.07E-02 | 1.98E-01 | 5.06E-02 | 4.93E-02 |
| -8.09E-02 | 1.76E-01 | 1.96E-02 | -6.67E-01 | 7.78E-02 | 1.99E-01 | 5.24E-02 | 4.97E-02 |
| -1.16E-01 | 8.54E-02 | 4.24E-02 | -5.95E-01 | 1.05E-01 | 2.01E-01 | 5.43E-02 | 5.01E-02 |
| -1.49E-01 | -4.20E-03 | 6.02E-02 | -5.20E-01 | 1.31E-01 | 2.03E-01 | 5.61E-02 | 5.05E-02 |
| 2.02E-01 | -7.29E-02 | 7.36E-02 | -4.43E-01 | 1.57E-01 | 2.04E-01 | 5.79E-02 | 5.08E-02 |
| 1.36E-01 | -1.23E-01 | 8.29E-02 | -3.65E-01 | 1.82E-01 | 2.05E-01 | 5.97E-02 | 5.12E-02 |
| 7.62E-02 | -1.74E-01 | 8.86E-02 | -2.87E-01 | 2.06E-01 | 2.06E-01 | 6.15E-02 | 5.16E-02 |
| -3.66E-01 | -2.38E-01 | 9.09E-02 | -2.12E-01 | 2.29E-01 | 2.08E-01 | 6.33E-02 | 5.20E-02 |
| 4.26E-01 | -3.22E-01 | 8.95E-02 | -1.38E-01 | 2.50E-01 | 2.09E-01 | 6.50E-02 | 5.24E-02 |
| 4.28E-01 | -4.11E-01 | 8.31E-02 | -6.76E-02 | 2.70E-01 | 2.10E-01 | 6.68E-02 | 5.28E-02 |
| 4.04E-01 | -4.60E-01 | 6.77E-02 | -1.42E-04 | 2.87E-01 | 2.11E-01 | 6.85E-02 | 5.32E-02 |
| 2.75E-01 | -3.88E-01 | 4.19E-02 | 6.36E-02 | 3.03E-01 | 2.12E-01 | 7.03E-02 | 5.36E-02 |
| -4.09E-01 | -1.49E-01 | 9.42E-03 | 1.23E-01 | 3.16E-01 | 2.13E-01 | 7.20E-02 | 5.40E-02 |
| 3.78E-01 | 2.35E-01 | -2.45E-02 | 1.78E-01 | 3.26E-01 | 2.14E-01 | 7.37E-02 | 5.44E-02 |
| -3.41E-01 | 5.21E-01 | -5.50E-02 | 2.29E-01 | 3.34E-01 | 2.15E-01 | 7.54E-02 | 5.47E-02 |
| 4.59E-02 | 5.07E-01 | -7.89E-02 | 2.75E-01 | 3.39E-01 | 2.16E-01 | 7.70E-02 | 5.51E-02 |
| 2.65E-01 | 2.64E-01 | -1.00E-01 | 3.15E-01 | 3.40E-01 | 2.17E-01 | 7.87E-02 | 5.55E-02 |
| 1.86E-01 | -7.56E-02 | -1.19E-01 | 3.50E-01 | 3.39E-01 | 2.18E-01 | 8.03E-02 | 5.59E-02 |
| 7.84E-02 | -3.81E-01 | -1.35E-01 | 3.79E-01 | 3.33E-01 | 2.19E-01 | 8.20E-02 | 5.63E-02 |
| -1.89E-01 | -5.19E-01 | -1.47E-01 | 4.02E-01 | 3.24E-01 | 2.20E-01 | 8.36E-02 | 5.67E-02 |
| 9.24E-02 | -3.97E-01 | -1.56E-01 | 4.19E-01 | 3.10E-01 | 2.21E-01 | 8.52E-02 | 5.71E-02 |
| 1.76E-01 | -6.54E-02 | -1.64E-01 | 4.28E-01 | 2.93E-01 | 2.22E-01 | 8.67E-02 | 5.75E-02 |
| -1.81E-01 | 3.21E-01 | -1.76E-01 | 4.30E-01 | 2.71E-01 | 2.23E-01 | 8.83E-02 | 5.79E-02 |
| 1.92E-01 | 3.99E-01 | -1.93E-01 | 4.22E-01 | 2.45E-01 | 2.24E-01 | 8.98E-02 | 5.83E-02 |
| -2.02E-01 | 5.55E-02 | -2.11E-01 | 4.00E-01 | 2.15E-01 | 2.25E-01 | 9.14E-02 | 5.87E-02 |
| 2.05E-01 | -2.96E-01 | -1.97E-01 | 3.60E-01 | 1.82E-01 | 2.26E-01 | 9.29E-02 | 5.91E-02 |
| -1.93E-01 | -2.85E-01 | -1.20E-01 | 3.01E-01 | 1.46E-01 | 2.27E-01 | 9.43E-02 | 5.95E-02 |
| -7.21E-02 | -2.93E-02 | 1.51E-02 | 2.26E-01 | 1.08E-01 | 2.28E-01 | 9.58E-02 | 5.99E-02 |
| 1.34E-01 | 1.40E-01 | 1.64E-01 | 1.41E-01 | 6.80E-02 | 2.30E-01 | 9.73E-02 | 6.04E-02 |
| -1.13E-01 | 8.34E-03 | 2.67E-01 | 5.18E-02 | 2.70E-02 | 2.31E-01 | 9.87E-02 | 6.08E-02 |
| 1.17E-01 | -8.12E-02 | 2.51E-01 | -3.45E-02 | -1.46E-02 | 2.32E-01 | 1.00E-01 | 6.12E-02 |
| -1.53E-01 | 7.51E-02 | 7.78E-02 | -1.11E-01 | -5.65E-02 | 2.34E-01 | 1.01E-01 | 6.16E-02 |
| 2.04E-01 | 3.77E-02 | -1.43E-01 | -1.71E-01 | -9.80E-02 | 2.35E-01 | 1.03E-01 | 6.20E-02 |
| -2.44E-01 | -9.95E-02 | -2.88E-01 | -2.08E-01 | -1.39E-01 | 2.37E-01 | 1.04E-01 | 6.24E-02 |
| 9.48E-02 | -3.67E-03 | -2.76E-01 | -2.16E-01 | -1.78E-01 | 2.38E-01 | 1.06E-01 | 6.28E-02 |
| 2.53E-01 | 1.40E-01 | -1.61E-01 | -1.97E-01 | -2.16E-01 | 2.40E-01 | 1.07E-01 | 6.32E-02 |
| -2.34E-01 | 7.23E-02 | -1.49E-02 | -1.58E-01 | -2.51E-01 | 2.41E-01 | 1.08E-01 | 6.36E-02 |
| 2.16E-01 | -1.37E-01 | 1.24E-01 | -1.07E-01 | -2.83E-01 | 2.43E-01 | 1.09E-01 | 6.40E-02 |
| 1.44E-01 | -1.86E-01 | 2.14E-01 | -5.12E-02 | -3.12E-01 | 2.45E-01 | 1.11E-01 | 6.45E-02 |
| -2.69E-02 | -6.82E-02 | 2.36E-01 | 1.73E-03 | -3.37E-01 | 2.47E-01 | 1.12E-01 | 6.49E-02 |
| -1.90E-01 | 9.88E-02 | 2.05E-01 | 4.51E-02 | -3.57E-01 | 2.49E-01 | 1.13E-01 | 6.53E-02 |
| -2.45E-01 | 1.97E-01 | 1.41E-01 | 7.71E-02 | -3.72E-01 | 2.51E-01 | 1.14E-01 | 6.57E-02 |
| 2.72E-01 | 1.49E-01 | 5.96E-02 | 9.72E-02 | -3.81E-01 | 2.53E-01 | 1.15E-01 | 6.61E-02 |
| -3.02E-01 | -9.19E-03 | -2.13E-02 | 1.05E-01 | -3.83E-01 | 2.55E-01 | 1.16E-01 | 6.65E-02 |
| 2.79E-01 | -1.26E-01 | -8.53E-02 | 9.93E-02 | -3.79E-01 | 2.58E-01 | 1.17E-01 | 6.70E-02 |
| 3.53E-01 | -1.67E-01 | -1.16E-01 | 8.11E-02 | -3.68E-01 | 2.60E-01 | 1.19E-01 | 6.74E-02 |
| 3.09E-01 | -1.28E-01 | -1.02E-01 | 5.17E-02 | -3.52E-01 | 2.62E-01 | 1.20E-01 | 6.78E-02 |
| 1.61E-01 | -1.28E-02 | -5.79E-02 | 1.54E-02 | -3.30E-01 | 2.65E-01 | 1.21E-01 | 6.82E-02 |
| -3.92E-01 | 9.19E-02 | -5.14E-03 | -2.13E-02 | -3.04E-01 | 2.67E-01 | 1.22E-01 | 6.87E-02 |
| -4.59E-02 | 1.06E-01 | 3.47E-02 | -5.15E-02 | -2.75E-01 | 2.70E-01 | 1.23E-01 | 6.91E-02 |
| 3.83E-01 | 5.18E-02 | 4.41E-02 | -6.83E-02 | -2.45E-01 | 2.73E-01 | 1.23E-01 | 6.95E-02 |
| 4.57E-02 | -3.05E-02 | 2.51E-02 | -6.68E-02 | -2.14E-01 | 2.75E-01 | 1.24E-01 | 6.99E-02 |
| -3.39E-01 | -6.66E-02 | -7.91E-03 | -5.07E-02 | -1.82E-01 | 2.78E-01 | 1.25E-01 | 7.03E-02 |
| -2.64E-02 | -7.62E-03 | -3.80E-02 | -2.58E-02 | -1.50E-01 | 2.80E-01 | 1.26E-01 | 7.08E-02 |
| 2.57E-01 | 5.52E-02 | -4.52E-02 | 2.27E-03 | -1.19E-01 | 2.83E-01 | 1.27E-01 | 7.12E-02 |
| -2.08E-01 | 2.78E-02 | -1.74E-02 | 2.94E-02 | -8.76E-02 | 2.85E-01 | 1.28E-01 | 7.16E-02 |
| 1.62E-01 | -4.23E-02 | 2.90E-02 | 5.25E-02 | -5.76E-02 | 2.88E-01 | 1.29E-01 | 7.21E-02 |
| 8.18E-02 | -5.33E-02 | 7.13E-02 | 6.86E-02 | -2.88E-02 | 2.90E-01 | 1.29E-01 | 7.25E-02 |
| -1.96E-02 | -1.67E-02 | 9.90E-02 | 7.50E-02 | -1.44E-03 | 2.92E-01 | 1.30E-01 | 7.29E-02 |
| -8.90E-02 | 2.49E-02 | 1.04E-01 | 6.91E-02 | 2.42E-02 | 2.95E-01 | 1.31E-01 | 7.34E-02 |
| -8.55E-02 | 3.83E-02 | 7.76E-02 | 5.13E-02 | 4.82E-02 | 2.97E-01 | 1.31E-01 | 7.38E-02 |
| -2.22E-02 | 2.78E-02 | 2.58E-02 | 2.49E-02 | 7.06E-02 | 2.99E-01 | 1.32E-01 | 7.42E-02 |
| 6.95E-02 | 7.99E-03 | -3.90E-02 | -6.33E-03 | 9.19E-02 | 3.00E-01 | 1.32E-01 | 7.47E-02 |
| 1.57E-01 | -6.04E-03 | -1.03E-01 | -3.84E-02 | 1.12E-01 | 3.02E-01 | 1.33E-01 | 7.51E-02 |
| -1.91E-01 | -3.46E-03 | -1.53E-01 | -6.77E-02 | 1.32E-01 | 3.03E-01 | 1.34E-01 | 7.55E-02 |
| 2.26E-01 | 4.44E-03 | -1.75E-01 | -9.02E-02 | 1.52E-01 | 3.05E-01 | 1.34E-01 | 7.60E-02 |
| 2.17E-01 | -8.35E-03 | -1.63E-01 | -1.03E-01 | 1.72E-01 | 3.06E-01 | 1.35E-01 | 7.64E-02 |
| 1.74E-01 | -2.69E-02 | -1.20E-01 | -1.06E-01 | 1.92E-01 | 3.07E-01 | 1.35E-01 | 7.68E-02 |
| -3.18E-01 | -2.74E-02 | -5.76E-02 | -1.01E-01 | 2.13E-01 | 3.08E-01 | 1.35E-01 | 7.73E-02 |
| 3.44E-01 | 7.92E-03 | 1.41E-02 | -8.99E-02 | 2.36E-01 | 3.08E-01 | 1.36E-01 | 7.77E-02 |
| -2.31E-01 | 7.11E-02 | 8.40E-02 | -7.28E-02 | 2.58E-01 | 3.08E-01 | 1.36E-01 | 7.81E-02 |
| -3.81E-01 | 1.18E-01 | 1.42E-01 | -5.14E-02 | 2.81E-01 | 3.08E-01 | 1.36E-01 | 7.86E-02 |
| -5.10E-02 | 1.08E-01 | 1.77E-01 | -2.66E-02 | 3.03E-01 | 3.08E-01 | 1.37E-01 | 7.90E-02 |
| 3.64E-01 | 3.90E-02 | 1.84E-01 | 4.06E-04 | 3.24E-01 | 3.08E-01 | 1.37E-01 | 7.95E-02 |
| 4.55E-02 | -7.39E-02 | 1.66E-01 | 2.85E-02 | 3.44E-01 | 3.07E-01 | 1.37E-01 | 7.99E-02 |
| -2.67E-01 | -1.70E-01 | 1.26E-01 | 5.67E-02 | 3.62E-01 | 3.06E-01 | 1.37E-01 | 8.04E-02 |
| 1.95E-01 | -2.14E-01 | 6.82E-02 | 8.33E-02 | 3.78E-01 | 3.04E-01 | 1.37E-01 | 8.08E-02 |
| -1.37E-01 | -2.49E-01 | -2.55E-03 | 1.07E-01 | 3.92E-01 | 3.03E-01 | 1.37E-01 | 8.13E-02 |
| 1.29E-01 | -6.53E-02 | -7.75E-02 | 1.25E-01 | 4.03E-01 | 3.01E-01 | 1.37E-01 | 8.17E-02 |
| -1.85E-01 | 2.84E-01 | -1.31E-01 | 1.36E-01 | 4.11E-01 | 2.98E-01 | 1.37E-01 | 8.21E-02 |
| 2.80E-01 | 2.26E-01 | -1.40E-01 | 1.39E-01 | 4.15E-01 | 2.95E-01 | 1.37E-01 | 8.26E-02 |
| 2.19E-01 | -1.40E-01 | -1.05E-01 | 1.31E-01 | 4.16E-01 | 2.92E-01 | 1.37E-01 | 8.30E-02 |
| -4.34E-01 | -3.34E-01 | -3.95E-02 | 1.15E-01 | 4.13E-01 | 2.89E-01 | 1.37E-01 | 8.35E-02 |
| 1.31E-02 | -2.40E-02 | 4.17E-02 | 9.11E-02 | 4.06E-01 | 2.85E-01 | 1.37E-01 | 8.39E-02 |
| 4.11E-01 | 3.61E-01 | 1.05E-01 | 6.19E-02 | 3.96E-01 | 2.81E-01 | 1.37E-01 | 8.44E-02 |
| -3.39E-01 | 3.42E-01 | 1.23E-01 | 2.91E-02 | 3.82E-01 | 2.76E-01 | 1.37E-01 | 8.48E-02 |
| -3.06E-01 | -1.01E-02 | 9.54E-02 | -5.44E-03 | 3.65E-01 | 2.71E-01 | 1.37E-01 | 8.53E-02 |
| 1.85E-01 | -3.84E-01 | 3.81E-02 | -4.00E-02 | 3.45E-01 | 2.66E-01 | 1.36E-01 | 8.57E-02 |
| -1.52E-01 | -3.18E-01 | -3.31E-02 | -7.30E-02 | 3.23E-01 | 2.60E-01 | 1.36E-01 | 8.62E-02 |
| 3.34E-02 | 2.76E-02 | -1.00E-01 | -1.03E-01 | 2.97E-01 | 2.54E-01 | 1.36E-01 | 8.66E-02 |
| 2.19E-01 | 3.48E-01 | -1.44E-01 | -1.28E-01 | 2.69E-01 | 2.48E-01 | 1.35E-01 | 8.71E-02 |
| 2.43E-01 | 3.83E-01 | -1.47E-01 | -1.48E-01 | 2.39E-01 | 2.41E-01 | 1.35E-01 | 8.76E-02 |
| -2.55E-01 | 8.72E-02 | -1.07E-01 | -1.60E-01 | 2.07E-01 | 2.34E-01 | 1.35E-01 | 8.80E-02 |
| -3.31E-01 | -2.62E-01 | -3.74E-02 | -1.64E-01 | 1.72E-01 | 2.27E-01 | 1.34E-01 | 8.85E-02 |
| 1.45E-01 | -3.78E-01 | 4.36E-02 | -1.60E-01 | 1.36E-01 | 2.20E-01 | 1.34E-01 | 8.89E-02 |
| 3.50E-01 | -2.22E-01 | 1.20E-01 | -1.49E-01 | 9.74E-02 | 2.12E-01 | 1.33E-01 | 8.94E-02 |
| -2.79E-02 | 1.27E-01 | 1.78E-01 | -1.31E-01 | 5.80E-02 | 2.04E-01 | 1.33E-01 | 8.98E-02 |
| -2.88E-01 | 3.82E-01 | 2.07E-01 | -1.07E-01 | 1.78E-02 | 1.96E-01 | 1.32E-01 | 9.03E-02 |
| 2.40E-01 | 2.85E-01 | 1.98E-01 | -7.73E-02 | -2.29E-02 | 1.88E-01 | 1.31E-01 | 9.08E-02 |
| -1.44E-01 | -7.76E-02 | 1.57E-01 | -4.34E-02 | -6.36E-02 | 1.79E-01 | 1.31E-01 | 9.12E-02 |
| -1.54E-01 | -3.94E-01 | 9.30E-02 | -6.43E-03 | -1.04E-01 | 1.71E-01 | 1.30E-01 | 9.17E-02 |
| -7.06E-02 | -3.90E-01 | 1.52E-02 | 3.24E-02 | -1.43E-01 | 1.62E-01 | 1.29E-01 | 9.21E-02 |
| 1.37E-01 | -1.01E-01 | -7.06E-02 | 7.17E-02 | -1.81E-01 | 1.52E-01 | 1.29E-01 | 9.26E-02 |
| -1.65E-01 | 2.93E-01 | -1.55E-01 | 1.10E-01 | -2.18E-01 | 1.43E-01 | 1.28E-01 | 9.31E-02 |
| 2.08E-01 | 4.01E-01 | -2.26E-01 | 1.46E-01 | -2.52E-01 | 1.34E-01 | 1.27E-01 | 9.35E-02 |
| -2.50E-01 | 1.13E-01 | -2.75E-01 | 1.79E-01 | -2.84E-01 | 1.24E-01 | 1.26E-01 | 9.40E-02 |
| -2.49E-01 | -2.57E-01 | -2.97E-01 | 2.07E-01 | -3.13E-01 | 1.14E-01 | 1.26E-01 | 9.45E-02 |
| 2.95E-01 | -3.93E-01 | -2.88E-01 | 2.29E-01 | -3.39E-01 | 1.04E-01 | 1.25E-01 | 9.49E-02 |
| -2.94E-01 | -2.29E-01 | -2.47E-01 | 2.43E-01 | -3.60E-01 | 9.39E-02 | 1.24E-01 | 9.54E-02 |
| -2.10E-01 | 4.42E-02 | -1.80E-01 | 2.49E-01 | -3.78E-01 | 8.36E-02 | 1.23E-01 | 9.58E-02 |
| -1.05E-01 | 2.82E-01 | -9.57E-02 | 2.48E-01 | -3.91E-01 | 7.33E-02 | 1.22E-01 | 9.63E-02 |
| 1.46E-01 | 3.69E-01 | -1.42E-03 | 2.39E-01 | -4.01E-01 | 6.28E-02 | 1.21E-01 | 9.68E-02 |
| 2.43E-01 | 2.09E-01 | 9.40E-02 | 2.22E-01 | -4.06E-01 | 5.22E-02 | 1.20E-01 | 9.72E-02 |
| -2.65E-01 | -1.38E-01 | 1.82E-01 | 1.97E-01 | -4.08E-01 | 4.15E-02 | 1.19E-01 | 9.77E-02 |
| 3.23E-01 | -3.55E-01 | 2.54E-01 | 1.66E-01 | -4.06E-01 | 3.08E-02 | 1.18E-01 | 9.82E-02 |
| -2.24E-01 | -2.13E-01 | 3.03E-01 | 1.27E-01 | -4.01E-01 | 1.99E-02 | 1.17E-01 | 9.86E-02 |
| -5.10E-01 | 9.89E-02 | 3.26E-01 | 8.09E-02 | -3.92E-01 | 9.07E-03 | 1.16E-01 | 9.91E-02 |
| -2.80E-01 | 3.29E-01 | 3.21E-01 | 2.90E-02 | -3.81E-01 | -1.83E-03 | 1.15E-01 | 9.96E-02 |
| 5.83E-01 | 3.58E-01 | 2.87E-01 | -2.75E-02 | -3.67E-01 | -1.28E-02 | 1.13E-01 | 1.00E-01 |
| 5.08E-01 | 1.44E-01 | 2.29E-01 | -8.70E-02 | -3.51E-01 | -2.37E-02 | 1.12E-01 | 1.00E-01 |
| -2.56E-01 | -1.67E-01 | 1.51E-01 | -1.48E-01 | -3.33E-01 | -3.46E-02 | 1.11E-01 | 1.01E-01 |
| -2.99E-01 | -3.82E-01 | 5.90E-02 | -2.08E-01 | -3.12E-01 | -4.55E-02 | 1.10E-01 | 1.01E-01 |
| -1.82E-01 | -3.51E-01 | -4.21E-02 | -2.66E-01 | -2.89E-01 | -5.63E-02 | 1.08E-01 | 1.02E-01 |
| 1.12E-01 | -1.04E-01 | -1.40E-01 | -3.20E-01 | -2.65E-01 | -6.71E-02 | 1.07E-01 | 1.02E-01 |
| -1.17E-01 | 2.40E-01 | -2.21E-01 | -3.69E-01 | -2.40E-01 | -7.78E-02 | 1.06E-01 | 1.03E-01 |
| 1.70E-01 | 4.34E-01 | -2.74E-01 | -4.10E-01 | -2.13E-01 | -8.85E-02 | 1.04E-01 | 1.03E-01 |
| -9.96E-02 | 3.32E-01 | -2.88E-01 | -4.42E-01 | -1.85E-01 | -9.90E-02 | 1.03E-01 | 1.04E-01 |
| -2.22E-01 | 3.57E-02 | -2.67E-01 | -4.63E-01 | -1.56E-01 | -1.09E-01 | 1.02E-01 | 1.04E-01 |
| 4.59E-02 | -2.93E-01 | -2.15E-01 | -4.74E-01 | -1.27E-01 | -1.20E-01 | 1.00E-01 | 1.05E-01 |
| 1.41E-01 | -4.87E-01 | -1.35E-01 | -4.74E-01 | -9.67E-02 | -1.30E-01 | 9.88E-02 | 1.05E-01 |
| -4.87E-02 | -4.29E-01 | -3.37E-02 | -4.62E-01 | -6.66E-02 | -1.40E-01 | 9.74E-02 | 1.06E-01 |
| -1.08E-01 | -1.17E-01 | 7.37E-02 | -4.40E-01 | -3.63E-02 | -1.50E-01 | 9.59E-02 | 1.06E-01 |
| 1.55E-01 | 2.76E-01 | 1.70E-01 | -4.07E-01 | -6.04E-03 | -1.59E-01 | 9.43E-02 | 1.07E-01 |
| -2.18E-01 | 5.17E-01 | 2.38E-01 | -3.63E-01 | 2.41E-02 | -1.69E-01 | 9.28E-02 | 1.07E-01 |
| 2.52E-01 | 3.51E-01 | 2.64E-01 | -3.09E-01 | 5.39E-02 | -1.78E-01 | 9.12E-02 | 1.08E-01 |
| 2.41E-01 | -1.09E-01 | 2.48E-01 | -2.45E-01 | 8.32E-02 | -1.87E-01 | 8.96E-02 | 1.08E-01 |
| -2.14E-01 | -4.99E-01 | 1.98E-01 | -1.72E-01 | 1.12E-01 | -1.95E-01 | 8.80E-02 | 1.08E-01 |
| 1.76E-01 | -5.08E-01 | 1.19E-01 | -9.11E-02 | 1.40E-01 | -2.04E-01 | 8.64E-02 | 1.09E-01 |
| -1.31E-01 | -2.08E-01 | 2.25E-02 | -5.58E-03 | 1.67E-01 | -2.12E-01 | 8.47E-02 | 1.09E-01 |
| -9.73E-02 | 1.56E-01 | -7.85E-02 | 8.31E-02 | 1.93E-01 | -2.20E-01 | 8.30E-02 | 1.10E-01 |
| 3.34E-02 | 4.14E-01 | -1.71E-01 | 1.73E-01 | 2.18E-01 | -2.27E-01 | 8.13E-02 | 1.10E-01 |
| -3.50E-02 | 4.49E-01 | -2.42E-01 | 2.62E-01 | 2.42E-01 | -2.35E-01 | 7.96E-02 | 1.11E-01 |
| 7.58E-02 | 2.76E-01 | -2.80E-01 | 3.48E-01 | 2.64E-01 | -2.41E-01 | 7.78E-02 | 1.11E-01 |
| 2.57E-01 | 6.17E-03 | -2.85E-01 | 4.29E-01 | 2.85E-01 | -2.48E-01 | 7.61E-02 | 1.12E-01 |
| -4.40E-01 | -2.14E-01 | -2.59E-01 | 5.04E-01 | 3.04E-01 | -2.54E-01 | 7.43E-02 | 1.12E-01 |
| -4.69E-01 | -3.19E-01 | -2.04E-01 | 5.73E-01 | 3.21E-01 | -2.60E-01 | 7.25E-02 | 1.13E-01 |
| 5.90E-01 | -3.19E-01 | -1.27E-01 | 6.35E-01 | 3.36E-01 | -2.65E-01 | 7.06E-02 | 1.13E-01 |
| 7.91E-01 | -2.74E-01 | -3.25E-02 | 6.91E-01 | 3.48E-01 | -2.70E-01 | 6.88E-02 | 1.14E-01 |
| 5.99E-01 | -2.36E-01 | 6.83E-02 | 7.39E-01 | 3.59E-01 | -2.75E-01 | 6.69E-02 | 1.14E-01 |
| 4.17E-01 | -1.94E-01 | 1.66E-01 | 7.79E-01 | 3.67E-01 | -2.79E-01 | 6.50E-02 | 1.14E-01 |
| -1.72E-01 | -1.24E-01 | 2.49E-01 | 8.11E-01 | 3.72E-01 | -2.82E-01 | 6.31E-02 | 1.15E-01 |
| -3.76E-01 | -1.11E-03 | 3.09E-01 | 8.36E-01 | 3.75E-01 | -2.85E-01 | 6.11E-02 | 1.15E-01 |
| 2.40E-01 | 1.51E-01 | 3.35E-01 | 8.51E-01 | 3.74E-01 | -2.88E-01 | 5.92E-02 | 1.16E-01 |
| -1.45E-01 | 1.50E-01 | 3.19E-01 | 8.58E-01 | 3.71E-01 | -2.90E-01 | 5.72E-02 | 1.16E-01 |
| 9.86E-02 | -2.76E-02 | 2.64E-01 | 8.56E-01 | 3.65E-01 | -2.92E-01 | 5.52E-02 | 1.17E-01 |
| -8.78E-02 | -1.34E-01 | 1.78E-01 | 8.44E-01 | 3.56E-01 | -2.93E-01 | 5.32E-02 | 1.17E-01 |
| 3.95E-02 | -1.16E-01 | 6.81E-02 | 8.23E-01 | 3.44E-01 | -2.94E-01 | 5.11E-02 | 1.18E-01 |
| 1.31E-01 | -4.21E-02 | -5.13E-02 | 7.93E-01 | 3.30E-01 | -2.94E-01 | 4.91E-02 | 1.18E-01 |
| -1.69E-01 | 2.92E-02 | -1.66E-01 | 7.52E-01 | 3.13E-01 | -2.94E-01 | 4.70E-02 | 1.19E-01 |
| -8.14E-02 | 1.06E-01 | -2.60E-01 | 7.02E-01 | 2.95E-01 | -2.94E-01 | 4.49E-02 | 1.19E-01 |
| -3.99E-03 | 1.70E-01 | -3.19E-01 | 6.41E-01 | 2.74E-01 | -2.93E-01 | 4.28E-02 | 1.20E-01 |
| 7.82E-02 | 1.92E-01 | -3.29E-01 | 5.69E-01 | 2.52E-01 | -2.91E-01 | 4.06E-02 | 1.20E-01 |
| 1.80E-01 | 1.46E-01 | -2.79E-01 | 4.86E-01 | 2.29E-01 | -2.90E-01 | 3.85E-02 | 1.20E-01 |
| 3.18E-01 | 2.62E-02 | -1.76E-01 | 3.90E-01 | 2.04E-01 | -2.87E-01 | 3.63E-02 | 1.21E-01 |
| -3.16E-01 | -1.44E-01 | -3.91E-02 | 2.78E-01 | 1.78E-01 | -2.85E-01 | 3.41E-02 | 1.21E-01 |
| -1.82E-01 | -2.65E-01 | 1.00E-01 | 1.51E-01 | 1.51E-01 | -2.82E-01 | 3.19E-02 | 1.22E-01 |
| 2.58E-01 | -2.44E-01 | 2.08E-01 | 1.02E-02 | 1.24E-01 | -2.79E-01 | 2.97E-02 | 1.22E-01 |
| -2.02E-01 | -6.26E-02 | 2.64E-01 | -1.42E-01 | 9.59E-02 | -2.75E-01 | 2.75E-02 | 1.23E-01 |
| 1.41E-01 | 1.90E-01 | 2.57E-01 | -3.03E-01 | 6.77E-02 | -2.71E-01 | 2.52E-02 | 1.23E-01 |
| -9.45E-02 | 2.92E-01 | 1.76E-01 | -4.65E-01 | 3.93E-02 | -2.67E-01 | 2.30E-02 | 1.24E-01 |
| 7.77E-02 | 4.82E-02 | 2.95E-02 | -6.24E-01 | 1.10E-02 | -2.62E-01 | 2.07E-02 | 1.24E-01 |
| -8.59E-02 | -2.75E-01 | -1.16E-01 | -7.70E-01 | -1.69E-02 | -2.57E-01 | 1.84E-02 | 1.25E-01 |
| 1.04E-01 | -2.40E-01 | -1.90E-01 | -8.98E-01 | -4.44E-02 | -2.52E-01 | 1.61E-02 | 1.25E-01 |
| -1.19E-01 | 8.88E-02 | -1.70E-01 | -9.99E-01 | -7.13E-02 | -2.47E-01 | 1.38E-02 | 1.25E-01 |
| 1.23E-01 | 2.47E-01 | -7.74E-02 | -1.07E+00 | -9.72E-02 | -2.41E-01 | 1.15E-02 | 1.26E-01 |
| -1.09E-01 | -4.35E-04 | 5.48E-02 | -1.10E+00 | -1.22E-01 | -2.35E-01 | 9.19E-03 | 1.26E-01 |
| 8.06E-02 | -2.65E-01 | 1.48E-01 | -1.10E+00 | -1.46E-01 | -2.28E-01 | 6.86E-03 | 1.27E-01 |
| -5.23E-02 | -1.39E-01 | 1.37E-01 | -1.07E+00 | -1.68E-01 | -2.22E-01 | 4.52E-03 | 1.27E-01 |
| 4.66E-02 | 2.01E-01 | 5.10E-02 | -1.00E+00 | -1.89E-01 | -2.15E-01 | 2.17E-03 | 1.28E-01 |
| -7.74E-02 | 3.60E-01 | -5.27E-02 | -9.18E-01 | -2.08E-01 | -2.08E-01 | -1.78E-04 | 1.28E-01 |
| 1.37E-01 | 1.37E-01 | -1.24E-01 | -8.26E-01 | -2.26E-01 | -2.00E-01 | -2.53E-03 | 1.29E-01 |
| 5.26E-02 | -2.42E-01 | -1.46E-01 | -7.32E-01 | -2.43E-01 | -1.92E-01 | -4.90E-03 | 1.29E-01 |
| -2.48E-01 | -4.63E-01 | -1.07E-01 | -6.42E-01 | -2.58E-01 | -1.85E-01 | -7.26E-03 | 1.29E-01 |
| 2.50E-01 | -3.29E-01 | -1.11E-02 | -5.59E-01 | -2.72E-01 | -1.77E-01 | -9.63E-03 | 1.30E-01 |
| -2.09E-01 | -5.07E-02 | 1.03E-01 | -4.85E-01 | -2.85E-01 | -1.68E-01 | -1.20E-02 | 1.30E-01 |
| 1.51E-01 | 2.54E-01 | 1.87E-01 | -4.24E-01 | -2.96E-01 | -1.60E-01 | -1.44E-02 | 1.31E-01 |
| -1.10E-01 | 4.69E-01 | 1.90E-01 | -3.78E-01 | -3.06E-01 | -1.51E-01 | -1.67E-02 | 1.31E-01 |
| 1.13E-01 | 3.23E-01 | 8.26E-02 | -3.46E-01 | -3.15E-01 | -1.42E-01 | -1.91E-02 | 1.32E-01 |
| -1.56E-01 | -7.74E-02 | -7.53E-02 | -3.23E-01 | -3.23E-01 | -1.33E-01 | -2.15E-02 | 1.32E-01 |
| 2.16E-01 | -3.41E-01 | -2.02E-01 | -3.05E-01 | -3.29E-01 | -1.24E-01 | -2.39E-02 | 1.33E-01 |
| -2.63E-01 | -2.54E-01 | -2.34E-01 | -2.86E-01 | -3.34E-01 | -1.15E-01 | -2.62E-02 | 1.33E-01 |
| -2.39E-01 | 3.19E-02 | -1.70E-01 | -2.62E-01 | -3.38E-01 | -1.05E-01 | -2.86E-02 | 1.33E-01 |
| 2.49E-01 | 1.67E-01 | -2.39E-02 | -2.31E-01 | -3.41E-01 | -9.55E-02 | -3.10E-02 | 1.34E-01 |
| -1.86E-01 | -3.27E-02 | 1.64E-01 | -1.93E-01 | -3.43E-01 | -8.57E-02 | -3.34E-02 | 1.34E-01 |
| 1.11E-01 | -8.63E-02 | 2.69E-01 | -1.46E-01 | -3.43E-01 | -7.59E-02 | -3.57E-02 | 1.35E-01 |
| -6.65E-02 | 6.73E-02 | 2.29E-01 | -9.08E-02 | -3.43E-01 | -6.59E-02 | -3.81E-02 | 1.35E-01 |
| 8.11E-02 | 3.12E-03 | 7.07E-02 | -2.60E-02 | -3.41E-01 | -5.58E-02 | -4.04E-02 | 1.36E-01 |
| -1.46E-01 | -6.82E-02 | -1.17E-01 | 4.69E-02 | -3.38E-01 | -4.56E-02 | -4.28E-02 | 1.36E-01 |
| 2.23E-01 | 6.57E-03 | -2.50E-01 | 1.26E-01 | -3.34E-01 | -3.54E-02 | -4.51E-02 | 1.36E-01 |
| -2.76E-01 | 5.86E-02 | -3.02E-01 | 2.10E-01 | -3.29E-01 | -2.50E-02 | -4.74E-02 | 1.37E-01 |
| -4.30E-02 | 1.01E-01 | -2.76E-01 | 2.95E-01 | -3.23E-01 | -1.47E-02 | -4.97E-02 | 1.37E-01 |
| 1.26E-01 | 1.47E-01 | -1.91E-01 | 3.82E-01 | -3.16E-01 | -4.24E-03 | -5.21E-02 | 1.38E-01 |
| 2.59E-01 | 1.92E-01 | -7.04E-02 | 4.68E-01 | -3.08E-01 | 6.23E-03 | -5.44E-02 | 1.38E-01 |
| -7.01E-03 | 2.22E-01 | 6.31E-02 | 5.54E-01 | -2.99E-01 | 1.67E-02 | -5.67E-02 | 1.39E-01 |
| -1.91E-01 | 1.77E-01 | 1.88E-01 | 6.39E-01 | -2.89E-01 | 2.72E-02 | -5.89E-02 | 1.39E-01 |
| 1.72E-01 | 1.38E-02 | 2.88E-01 | 7.22E-01 | -2.78E-01 | 3.78E-02 | -6.12E-02 | 1.39E-01 |
| -1.71E-01 | -2.01E-01 | 3.43E-01 | 8.03E-01 | -2.66E-01 | 4.83E-02 | -6.35E-02 | 1.40E-01 |
| -1.23E-01 | -3.42E-01 | 3.37E-01 | 8.80E-01 | -2.54E-01 | 5.88E-02 | -6.57E-02 | 1.40E-01 |
| 2.03E-01 | -2.84E-01 | 2.61E-01 | 9.51E-01 | -2.40E-01 | 6.93E-02 | -6.79E-02 | 1.41E-01 |
| -1.11E-02 | -3.14E-02 | 1.35E-01 | 1.02E+00 | -2.25E-01 | 7.97E-02 | -7.01E-02 | 1.41E-01 |
| -2.35E-01 | 2.62E-01 | -1.31E-02 | 1.07E+00 | -2.10E-01 | 9.01E-02 | -7.23E-02 | 1.41E-01 |
| 8.38E-02 | 4.23E-01 | -1.58E-01 | 1.11E+00 | -1.94E-01 | 1.01E-01 | -7.45E-02 | 1.42E-01 |
| 2.31E-01 | 3.37E-01 | -2.76E-01 | 1.14E+00 | -1.76E-01 | 1.11E-01 | -7.67E-02 | 1.42E-01 |
| -2.16E-01 | 1.37E-02 | -3.52E-01 | 1.16E+00 | -1.58E-01 | 1.21E-01 | -7.88E-02 | 1.43E-01 |
| 1.17E-01 | -3.24E-01 | -3.75E-01 | 1.16E+00 | -1.40E-01 | 1.31E-01 | -8.10E-02 | 1.43E-01 |
| 1.79E-01 | -4.38E-01 | -3.34E-01 | 1.14E+00 | -1.20E-01 | 1.41E-01 | -8.31E-02 | 1.43E-01 |
| -1.66E-01 | -1.97E-01 | -2.27E-01 | 1.11E+00 | -9.97E-02 | 1.51E-01 | -8.52E-02 | 1.44E-01 |
| 1.58E-01 | 1.54E-01 | -7.82E-02 | 1.06E+00 | -7.89E-02 | 1.61E-01 | -8.72E-02 | 1.44E-01 |
| -1.50E-01 | 3.39E-01 | 8.01E-02 | 9.98E-01 | -5.75E-02 | 1.71E-01 | -8.93E-02 | 1.45E-01 |
| 1.44E-01 | 3.64E-01 | 2.16E-01 | 9.16E-01 | -3.57E-02 | 1.80E-01 | -9.13E-02 | 1.45E-01 |
| -1.44E-01 | 2.31E-01 | 3.03E-01 | 8.17E-01 | -1.37E-02 | 1.90E-01 | -9.33E-02 | 1.45E-01 |
| 1.57E-01 | -2.42E-02 | 3.44E-01 | 7.00E-01 | 8.56E-03 | 1.99E-01 | -9.53E-02 | 1.46E-01 |
| 2.90E-02 | -1.96E-01 | 3.44E-01 | 5.68E-01 | 3.09E-02 | 2.08E-01 | -9.73E-02 | 1.46E-01 |
| -2.13E-01 | -2.06E-01 | 3.10E-01 | 4.23E-01 | 5.32E-02 | 2.17E-01 | -9.92E-02 | 1.47E-01 |
| 2.42E-01 | -6.98E-02 | 2.46E-01 | 2.69E-01 | 7.53E-02 | 2.26E-01 | -1.01E-01 | 1.47E-01 |
| -6.74E-02 | 4.80E-02 | 1.66E-01 | 1.09E-01 | 9.72E-02 | 2.34E-01 | -1.03E-01 | 1.47E-01 |
| -2.80E-01 | 8.11E-02 | 7.61E-02 | -5.26E-02 | 1.19E-01 | 2.43E-01 | -1.05E-01 | 1.48E-01 |
| 3.82E-03 | 2.59E-02 | -2.05E-02 | -2.12E-01 | 1.40E-01 | 2.51E-01 | -1.07E-01 | 1.48E-01 |
| 2.83E-01 | -3.13E-02 | -1.16E-01 | -3.66E-01 | 1.61E-01 | 2.59E-01 | -1.09E-01 | 1.48E-01 |
| 6.06E-02 | -1.39E-02 | -1.95E-01 | -5.10E-01 | 1.81E-01 | 2.67E-01 | -1.10E-01 | 1.49E-01 |
| -2.47E-01 | 2.96E-02 | -2.28E-01 | -6.40E-01 | 2.00E-01 | 2.74E-01 | -1.12E-01 | 1.49E-01 |
| 2.14E-01 | 2.38E-02 | -1.92E-01 | -7.54E-01 | 2.18E-01 | 2.81E-01 | -1.14E-01 | 1.50E-01 |
| -1.18E-01 | -6.51E-02 | -1.01E-01 | -8.49E-01 | 2.36E-01 | 2.88E-01 | -1.15E-01 | 1.50E-01 |
| -1.32E-01 | -1.03E-01 | 6.58E-03 | -9.26E-01 | 2.52E-01 | 2.95E-01 | -1.17E-01 | 1.50E-01 |
| 9.43E-02 | 2.33E-02 | 9.46E-02 | -9.85E-01 | 2.67E-01 | 3.01E-01 | -1.19E-01 | 1.51E-01 |
| -6.82E-02 | 1.68E-01 | 1.35E-01 | -1.03E+00 | 2.81E-01 | 3.07E-01 | -1.20E-01 | 1.51E-01 |
| 5.83E-02 | 7.27E-02 | 1.10E-01 | -1.05E+00 | 2.94E-01 | 3.13E-01 | -1.22E-01 | 1.51E-01 |
| -6.21E-02 | -1.52E-01 | 4.69E-02 | -1.06E+00 | 3.05E-01 | 3.19E-01 | -1.23E-01 | 1.52E-01 |
| 6.89E-02 | -2.35E-01 | -1.79E-02 | -1.06E+00 | 3.14E-01 | 3.24E-01 | -1.25E-01 | 1.52E-01 |
| -6.89E-02 | -8.48E-02 | -5.46E-02 | -1.04E+00 | 3.22E-01 | 3.28E-01 | -1.26E-01 | 1.53E-01 |
| 6.48E-02 | 1.62E-01 | -6.14E-02 | -1.02E+00 | 3.29E-01 | 3.33E-01 | -1.28E-01 | 1.53E-01 |
| -7.02E-02 | 2.48E-01 | -4.48E-02 | -1.00E+00 | 3.34E-01 | 3.37E-01 | -1.29E-01 | 1.53E-01 |
| -8.63E-03 | 1.20E-01 | -1.41E-02 | -9.72E-01 | 3.38E-01 | 3.41E-01 | -1.31E-01 | 1.54E-01 |
| 1.41E-01 | -1.03E-01 | 1.77E-02 | -9.36E-01 | 3.41E-01 | 3.44E-01 | -1.32E-01 | 1.54E-01 |
| -2.03E-01 | -2.28E-01 | 3.70E-02 | -8.92E-01 | 3.42E-01 | 3.47E-01 | -1.33E-01 | 1.54E-01 |
| 1.12E-01 | -1.93E-01 | 3.42E-02 | -8.39E-01 | 3.43E-01 | 3.50E-01 | -1.34E-01 | 1.55E-01 |
| 3.46E-01 | -6.76E-02 | 1.46E-02 | -7.77E-01 | 3.42E-01 | 3.52E-01 | -1.36E-01 | 1.55E-01 |
| 1.74E-01 | 6.25E-02 | -1.24E-02 | -7.07E-01 | 3.40E-01 | 3.54E-01 | -1.37E-01 | 1.55E-01 |
| 2.16E-02 | 1.64E-01 | -3.75E-02 | -6.29E-01 | 3.37E-01 | 3.55E-01 | -1.38E-01 | 1.56E-01 |
| -9.94E-02 | 2.18E-01 | -5.15E-02 | -5.43E-01 | 3.32E-01 | 3.56E-01 | -1.39E-01 | 1.56E-01 |
| -1.78E-01 | 2.05E-01 | -4.71E-02 | -4.51E-01 | 3.27E-01 | 3.57E-01 | -1.40E-01 | 1.56E-01 |
| -6.04E-01 | 1.16E-01 | -2.56E-02 | -3.53E-01 | 3.21E-01 | 3.57E-01 | -1.41E-01 | 1.57E-01 |
| -1.73E-01 | -4.06E-02 | 8.89E-03 | -2.51E-01 | 3.14E-01 | 3.57E-01 | -1.42E-01 | 1.57E-01 |
| 2.58E-01 | -2.05E-01 | 4.86E-02 | -1.47E-01 | 3.06E-01 | 3.56E-01 | -1.43E-01 | 1.57E-01 |
| 6.25E-01 | -3.01E-01 | 8.53E-02 | -4.22E-02 | 2.97E-01 | 3.55E-01 | -1.43E-01 | 1.58E-01 |
| 7.39E-02 | -2.71E-01 | 1.13E-01 | 6.18E-02 | 2.87E-01 | 3.54E-01 | -1.44E-01 | 1.58E-01 |
| -5.84E-01 | -1.20E-01 | 1.29E-01 | 1.63E-01 | 2.77E-01 | 3.52E-01 | -1.45E-01 | 1.58E-01 |
| -5.07E-01 | 1.16E-01 | 1.33E-01 | 2.61E-01 | 2.65E-01 | 3.50E-01 | -1.46E-01 | 1.59E-01 |
| -3.94E-01 | 3.37E-01 | 1.24E-01 | 3.53E-01 | 2.53E-01 | 3.47E-01 | -1.46E-01 | 1.59E-01 |
| -1.26E-01 | 4.25E-01 | 1.00E-01 | 4.40E-01 | 2.40E-01 | 3.45E-01 | -1.47E-01 | 1.59E-01 |
| 4.16E-01 | 2.61E-01 | 6.10E-02 | 5.20E-01 | 2.26E-01 | 3.42E-01 | -1.48E-01 | 1.60E-01 |
| -3.66E-01 | -1.71E-01 | 1.33E-02 | 5.93E-01 | 2.12E-01 | 3.38E-01 | -1.48E-01 | 1.60E-01 |
| 3.21E-01 | -4.54E-01 | -3.45E-02 | 6.58E-01 | 1.97E-01 | 3.34E-01 | -1.49E-01 | 1.60E-01 |
| 1.25E-01 | -2.55E-01 | -7.64E-02 | 7.17E-01 | 1.82E-01 | 3.30E-01 | -1.49E-01 | 1.60E-01 |
| -2.78E-01 | 1.57E-01 | -1.15E-01 | 7.67E-01 | 1.66E-01 | 3.26E-01 | -1.50E-01 | 1.61E-01 |
| 2.86E-01 | 4.14E-01 | -1.53E-01 | 8.10E-01 | 1.49E-01 | 3.21E-01 | -1.50E-01 | 1.61E-01 |
| -8.14E-02 | 4.07E-01 | -1.94E-01 | 8.44E-01 | 1.32E-01 | 3.16E-01 | -1.50E-01 | 1.61E-01 |
| -3.07E-01 | 2.64E-01 | -2.31E-01 | 8.71E-01 | 1.14E-01 | 3.11E-01 | -1.51E-01 | 1.62E-01 |
| 2.83E-01 | 1.06E-01 | -2.55E-01 | 8.90E-01 | 9.60E-02 | 3.06E-01 | -1.51E-01 | 1.62E-01 |
| 9.98E-02 | -9.56E-02 | -2.59E-01 | 9.00E-01 | 7.75E-02 | 3.00E-01 | -1.51E-01 | 1.62E-01 |
| -1.74E-01 | -2.27E-01 | -2.33E-01 | 9.01E-01 | 5.87E-02 | 2.94E-01 | -1.51E-01 | 1.63E-01 |
| 1.31E-01 | -1.59E-01 | -1.72E-01 | 8.95E-01 | 3.96E-02 | 2.87E-01 | -1.52E-01 | 1.63E-01 |
| -1.25E-01 | 4.93E-02 | -8.24E-02 | 8.79E-01 | 2.02E-02 | 2.81E-01 | -1.52E-01 | 1.63E-01 |
| 1.59E-01 | 1.09E-01 | 2.53E-02 | 8.55E-01 | 7.78E-04 | 2.74E-01 | -1.52E-01 | 1.63E-01 |
| -2.22E-01 | 3.45E-02 | 1.38E-01 | 8.23E-01 | -1.88E-02 | 2.67E-01 | -1.52E-01 | 1.64E-01 |
| -1.87E-01 | -2.42E-02 | 2.30E-01 | 7.82E-01 | -3.84E-02 | 2.59E-01 | -1.52E-01 | 1.64E-01 |
| -1.55E-01 | -3.39E-02 | 2.84E-01 | 7.33E-01 | -5.80E-02 | 2.52E-01 | -1.52E-01 | 1.64E-01 |
| -9.65E-02 | -1.67E-02 | 2.92E-01 | 6.75E-01 | -7.76E-02 | 2.44E-01 | -1.52E-01 | 1.64E-01 |
| 7.02E-03 | 7.49E-03 | 2.56E-01 | 6.11E-01 | -9.71E-02 | 2.36E-01 | -1.52E-01 | 1.65E-01 |
| 5.73E-01 | 1.41E-02 | 1.83E-01 | 5.41E-01 | -1.16E-01 | 2.28E-01 | -1.52E-01 | 1.65E-01 |
| -6.76E-03 | -1.27E-02 | 8.85E-02 | 4.65E-01 | -1.35E-01 | 2.19E-01 | -1.51E-01 | 1.65E-01 |
| -5.90E-01 | -2.75E-02 | -9.93E-03 | 3.85E-01 | -1.54E-01 | 2.11E-01 | -1.51E-01 | 1.66E-01 |
| -4.32E-01 | 1.15E-02 | -9.72E-02 | 3.01E-01 | -1.73E-01 | 2.02E-01 | -1.51E-01 | 1.66E-01 |
| 5.02E-01 | 6.58E-02 | -1.68E-01 | 2.15E-01 | -1.91E-01 | 1.93E-01 | -1.51E-01 | 1.66E-01 |
| 2.53E-01 | 7.74E-02 | -2.18E-01 | 1.27E-01 | -2.09E-01 | 1.83E-01 | -1.50E-01 | 1.66E-01 |
| -3.59E-01 | 2.85E-02 | -2.47E-01 | 3.80E-02 | -2.26E-01 | 1.74E-01 | -1.50E-01 | 1.67E-01 |
| -1.34E-01 | -7.01E-02 | -2.59E-01 | -5.05E-02 | -2.43E-01 | 1.64E-01 | -1.49E-01 | 1.67E-01 |
| 7.26E-02 | -1.61E-01 | -2.62E-01 | -1.38E-01 | -2.59E-01 | 1.55E-01 | -1.49E-01 | 1.67E-01 |
| 1.99E-01 | -1.75E-01 | -2.64E-01 | -2.23E-01 | -2.74E-01 | 1.45E-01 | -1.49E-01 | 1.67E-01 |
| -1.88E-01 | -8.41E-02 | -2.64E-01 | -3.06E-01 | -2.89E-01 | 1.35E-01 | -1.48E-01 | 1.68E-01 |
| 1.98E-01 | 3.05E-02 | -2.60E-01 | -3.84E-01 | -3.03E-01 | 1.24E-01 | -1.48E-01 | 1.68E-01 |
| 1.80E-01 | 1.34E-01 | -2.49E-01 | -4.58E-01 | -3.17E-01 | 1.14E-01 | -1.47E-01 | 1.68E-01 |
| -2.35E-01 | 2.17E-01 | -2.28E-01 | -5.27E-01 | -3.29E-01 | 1.04E-01 | -1.46E-01 | 1.68E-01 |
| 1.64E-01 | 2.70E-01 | -1.94E-01 | -5.90E-01 | -3.41E-01 | 9.30E-02 | -1.46E-01 | 1.68E-01 |
| 2.35E-01 | 2.28E-01 | -1.47E-01 | -6.46E-01 | -3.52E-01 | 8.23E-02 | -1.45E-01 | 1.69E-01 |
| 2.10E-02 | 4.69E-02 | -8.55E-02 | -6.94E-01 | -3.61E-01 | 7.14E-02 | -1.44E-01 | 1.69E-01 |
| -1.89E-01 | -1.60E-01 | -1.31E-02 | -7.34E-01 | -3.70E-01 | 6.05E-02 | -1.44E-01 | 1.69E-01 |
| -1.27E-01 | -2.55E-01 | 6.84E-02 | -7.64E-01 | -3.77E-01 | 4.94E-02 | -1.43E-01 | 1.69E-01 |
| 1.40E-01 | -1.68E-01 | 1.52E-01 | -7.83E-01 | -3.84E-01 | 3.83E-02 | -1.42E-01 | 1.70E-01 |
| -1.36E-01 | 6.97E-02 | 2.12E-01 | -7.89E-01 | -3.89E-01 | 2.70E-02 | -1.41E-01 | 1.70E-01 |
| 1.54E-01 | 1.84E-01 | 2.18E-01 | -7.83E-01 | -3.93E-01 | 1.57E-02 | -1.40E-01 | 1.70E-01 |
| -8.62E-02 | 7.98E-02 | 1.53E-01 | -7.63E-01 | -3.96E-01 | 4.32E-03 | -1.39E-01 | 1.70E-01 |
| -2.38E-01 | -8.03E-02 | 4.08E-02 | -7.29E-01 | -3.97E-01 | -7.15E-03 | -1.38E-01 | 1.70E-01 |
| 2.84E-01 | -1.14E-01 | -8.21E-02 | -6.82E-01 | -3.97E-01 | -1.87E-02 | -1.37E-01 | 1.71E-01 |
| -1.83E-01 | -3.37E-03 | -1.80E-01 | -6.20E-01 | -3.96E-01 | -3.03E-02 | -1.36E-01 | 1.71E-01 |
| -3.30E-01 | 1.11E-01 | -2.13E-01 | -5.46E-01 | -3.94E-01 | -4.19E-02 | -1.35E-01 | 1.71E-01 |
| -4.65E-02 | 8.88E-02 | -1.51E-01 | -4.60E-01 | -3.91E-01 | -5.36E-02 | -1.34E-01 | 1.71E-01 |
| 2.80E-01 | -6.23E-02 | -1.29E-02 | -3.65E-01 | -3.87E-01 | -6.53E-02 | -1.33E-01 | 1.71E-01 |
| -2.32E-01 | -1.94E-01 | 1.32E-01 | -2.64E-01 | -3.82E-01 | -7.71E-02 | -1.32E-01 | 1.72E-01 |
| 1.98E-01 | -8.99E-03 | 2.21E-01 | -1.59E-01 | -3.75E-01 | -8.88E-02 | -1.31E-01 | 1.72E-01 |
| -2.03E-01 | 2.83E-01 | 2.26E-01 | -5.27E-02 | -3.68E-01 | -1.01E-01 | -1.30E-01 | 1.72E-01 |
| -1.12E-01 | 1.72E-01 | 1.43E-01 | 5.28E-02 | -3.60E-01 | -1.12E-01 | -1.28E-01 | 1.72E-01 |
| 2.78E-01 | -1.86E-01 | 1.18E-02 | 1.54E-01 | -3.51E-01 | -1.24E-01 | -1.27E-01 | 1.72E-01 |
| -2.81E-01 | -3.99E-01 | -1.16E-01 | 2.50E-01 | -3.41E-01 | -1.36E-01 | -1.26E-01 | 1.73E-01 |
| 2.31E-01 | -1.11E-01 | -1.99E-01 | 3.36E-01 | -3.31E-01 | -1.47E-01 | -1.25E-01 | 1.73E-01 |
| -1.48E-01 | 2.32E-01 | -2.42E-01 | 4.13E-01 | -3.19E-01 | -1.59E-01 | -1.23E-01 | 1.73E-01 |
| 7.49E-02 | 3.60E-01 | -2.60E-01 | 4.81E-01 | -3.07E-01 | -1.71E-01 | -1.22E-01 | 1.73E-01 |
| -4.86E-02 | 4.31E-01 | -2.69E-01 | 5.39E-01 | -2.94E-01 | -1.82E-01 | -1.21E-01 | 1.73E-01 |
| 6.95E-02 | 2.72E-01 | -2.80E-01 | 5.88E-01 | -2.80E-01 | -1.94E-01 | -1.19E-01 | 1.73E-01 |
| -3.10E-03 | -9.17E-02 | -2.89E-01 | 6.26E-01 | -2.66E-01 | -2.05E-01 | -1.18E-01 | 1.74E-01 |
| -1.67E-01 | -3.63E-01 | -2.89E-01 | 6.54E-01 | -2.51E-01 | -2.16E-01 | -1.16E-01 | 1.74E-01 |
| 1.29E-01 | -2.98E-01 | -2.72E-01 | 6.72E-01 | -2.35E-01 | -2.27E-01 | -1.15E-01 | 1.74E-01 |
| 2.25E-01 | -4.41E-02 | -2.35E-01 | 6.81E-01 | -2.19E-01 | -2.39E-01 | -1.13E-01 | 1.74E-01 |
| -6.26E-02 | 1.74E-01 | -1.73E-01 | 6.81E-01 | -2.03E-01 | -2.50E-01 | -1.12E-01 | 1.74E-01 |
| -2.14E-01 | 2.34E-01 | -8.01E-02 | 6.72E-01 | -1.86E-01 | -2.60E-01 | -1.10E-01 | 1.74E-01 |
| 2.02E-01 | 1.06E-01 | 4.23E-02 | 6.54E-01 | -1.68E-01 | -2.71E-01 | -1.08E-01 | 1.74E-01 |
| -1.94E-01 | -1.47E-02 | 1.75E-01 | 6.27E-01 | -1.50E-01 | -2.82E-01 | -1.07E-01 | 1.75E-01 |
| 1.86E-01 | -8.63E-02 | 2.92E-01 | 5.93E-01 | -1.31E-01 | -2.92E-01 | -1.05E-01 | 1.75E-01 |
| -1.83E-01 | -1.60E-01 | 3.64E-01 | 5.52E-01 | -1.12E-01 | -3.02E-01 | -1.03E-01 | 1.75E-01 |
| 2.05E-01 | -9.90E-02 | 3.55E-01 | 5.03E-01 | -9.33E-02 | -3.13E-01 | -1.02E-01 | 1.75E-01 |
| -2.45E-01 | 8.50E-02 | 2.62E-01 | 4.49E-01 | -7.38E-02 | -3.23E-01 | -9.98E-02 | 1.75E-01 |
| -1.10E-01 | 1.60E-01 | 9.93E-02 | 3.90E-01 | -5.41E-02 | -3.32E-01 | -9.81E-02 | 1.75E-01 |
| 2.31E-01 | 6.22E-02 | -9.51E-02 | 3.28E-01 | -3.41E-02 | -3.42E-01 | -9.63E-02 | 1.75E-01 |
| -1.36E-01 | -1.44E-01 | -2.74E-01 | 2.64E-01 | -1.41E-02 | -3.51E-01 | -9.44E-02 | 1.75E-01 |
| 5.59E-02 | -1.71E-01 | -3.87E-01 | 1.99E-01 | 6.16E-03 | -3.60E-01 | -9.26E-02 | 1.76E-01 |
| -7.68E-02 | 2.56E-02 | -4.01E-01 | 1.35E-01 | 2.65E-02 | -3.69E-01 | -9.07E-02 | 1.76E-01 |
| 1.65E-01 | 1.63E-01 | -3.29E-01 | 7.28E-02 | 4.68E-02 | -3.78E-01 | -8.88E-02 | 1.76E-01 |
| -2.25E-01 | 6.99E-02 | -2.02E-01 | 1.29E-02 | 6.71E-02 | -3.87E-01 | -8.69E-02 | 1.76E-01 |
| 2.33E-01 | -9.48E-02 | -4.94E-02 | -4.46E-02 | 8.74E-02 | -3.95E-01 | -8.49E-02 | 1.76E-01 |
| 1.63E-01 | -1.32E-01 | 9.83E-02 | -9.95E-02 | 1.08E-01 | -4.03E-01 | -8.30E-02 | 1.76E-01 |
| 7.53E-04 | -5.66E-02 | 2.22E-01 | -1.51E-01 | 1.28E-01 | -4.11E-01 | -8.10E-02 | 1.76E-01 |
| -1.69E-01 | 5.40E-02 | 3.16E-01 | -2.00E-01 | 1.48E-01 | -4.18E-01 | -7.89E-02 | 1.76E-01 |
| 1.36E-01 | 1.23E-01 | 3.75E-01 | -2.46E-01 | 1.67E-01 | -4.25E-01 | -7.69E-02 | 1.76E-01 |
| 1.78E-01 | 8.83E-02 | 3.94E-01 | -2.88E-01 | 1.87E-01 | -4.32E-01 | -7.48E-02 | 1.77E-01 |
| -2.36E-02 | -6.12E-02 | 3.68E-01 | -3.27E-01 | 2.06E-01 | -4.39E-01 | -7.27E-02 | 1.77E-01 |
| -2.18E-01 | -1.68E-01 | 2.88E-01 | -3.62E-01 | 2.25E-01 | -4.45E-01 | -7.06E-02 | 1.77E-01 |
| 2.34E-01 | -6.74E-02 | 1.53E-01 | -3.93E-01 | 2.43E-01 | -4.51E-01 | -6.85E-02 | 1.77E-01 |
| -2.45E-01 | 1.87E-01 | -1.08E-02 | -4.20E-01 | 2.61E-01 | -4.57E-01 | -6.63E-02 | 1.77E-01 |
| 2.53E-01 | 2.54E-01 | -1.66E-01 | -4.43E-01 | 2.78E-01 | -4.62E-01 | -6.42E-02 | 1.77E-01 |
| -2.00E-01 | 2.51E-02 | -2.84E-01 | -4.61E-01 | 2.95E-01 | -4.67E-01 | -6.20E-02 | 1.77E-01 |
| -2.60E-01 | -2.58E-01 | -3.43E-01 | -4.75E-01 | 3.12E-01 | -4.72E-01 | -5.97E-02 | 1.77E-01 |
| -2.16E-01 | -3.30E-01 | -3.20E-01 | -4.83E-01 | 3.28E-01 | -4.76E-01 | -5.75E-02 | 1.77E-01 |
| 2.64E-01 | -1.31E-01 | -2.06E-01 | -4.87E-01 | 3.43E-01 | -4.80E-01 | -5.52E-02 | 1.77E-01 |
| -2.70E-01 | 2.24E-01 | -4.27E-02 | -4.85E-01 | 3.58E-01 | -4.84E-01 | -5.29E-02 | 1.77E-01 |
| 2.17E-01 | 3.61E-01 | 1.16E-01 | -4.77E-01 | 3.72E-01 | -4.87E-01 | -5.06E-02 | 1.77E-01 |
| 2.77E-01 | 1.66E-01 | 2.25E-01 | -4.63E-01 | 3.86E-01 | -4.90E-01 | -4.83E-02 | 1.77E-01 |
| -2.69E-01 | -1.70E-01 | 2.71E-01 | -4.43E-01 | 3.98E-01 | -4.93E-01 | -4.60E-02 | 1.78E-01 |
| -1.03E-01 | -3.54E-01 | 2.49E-01 | -4.17E-01 | 4.10E-01 | -4.95E-01 | -4.36E-02 | 1.78E-01 |
| 2.32E-01 | -2.46E-01 | 1.64E-01 | -3.84E-01 | 4.21E-01 | -4.96E-01 | -4.12E-02 | 1.78E-01 |
| -1.39E-02 | 6.98E-02 | 4.36E-02 | -3.45E-01 | 4.32E-01 | -4.97E-01 | -3.88E-02 | 1.78E-01 |
| -2.03E-01 | 3.20E-01 | -7.48E-02 | -3.00E-01 | 4.41E-01 | -4.98E-01 | -3.64E-02 | 1.78E-01 |
| 2.04E-01 | 3.37E-01 | -1.58E-01 | -2.49E-01 | 4.50E-01 | -4.99E-01 | -3.39E-02 | 1.78E-01 |
| -2.33E-02 | 1.26E-01 | -1.87E-01 | -1.93E-01 | 4.57E-01 | -4.98E-01 | -3.15E-02 | 1.78E-01 |
| -2.29E-01 | -1.56E-01 | -1.72E-01 | -1.32E-01 | 4.63E-01 | -4.98E-01 | -2.90E-02 | 1.78E-01 |
| 2.35E-01 | -3.37E-01 | -1.25E-01 | -6.86E-02 | 4.69E-01 | -4.97E-01 | -2.65E-02 | 1.78E-01 |
| 9.72E-02 | -3.38E-01 | -5.96E-02 | -3.84E-03 | 4.73E-01 | -4.95E-01 | -2.40E-02 | 1.78E-01 |
| -2.12E-01 | -1.70E-01 | 1.05E-02 | 6.03E-02 | 4.76E-01 | -4.93E-01 | -2.15E-02 | 1.78E-01 |
| 1.93E-01 | 1.00E-01 | 7.09E-02 | 1.22E-01 | 4.77E-01 | -4.91E-01 | -1.90E-02 | 1.78E-01 |
| -1.00E-01 | 2.92E-01 | 1.08E-01 | 1.80E-01 | 4.77E-01 | -4.88E-01 | -1.64E-02 | 1.78E-01 |
| -1.80E-01 | 3.14E-01 | 1.09E-01 | 2.32E-01 | 4.76E-01 | -4.84E-01 | -1.39E-02 | 1.78E-01 |
| -1.44E-02 | 1.32E-01 | 7.65E-02 | 2.77E-01 | 4.74E-01 | -4.80E-01 | -1.13E-02 | 1.78E-01 |
| 2.50E-01 | -1.20E-01 | 2.49E-02 | 3.13E-01 | 4.70E-01 | -4.76E-01 | -8.72E-03 | 1.78E-01 |
| 4.47E-03 | -2.51E-01 | -2.87E-02 | 3.38E-01 | 4.65E-01 | -4.71E-01 | -6.13E-03 | 1.78E-01 |
| -3.92E-01 | -2.32E-01 | -6.90E-02 | 3.53E-01 | 4.58E-01 | -4.65E-01 | -3.53E-03 | 1.78E-01 |
| -1.15E-01 | -9.05E-02 | -8.86E-02 | 3.56E-01 | 4.50E-01 | -4.59E-01 | -9.26E-04 | 1.78E-01 |
| 5.43E-01 | 6.28E-02 | -8.68E-02 | 3.47E-01 | 4.40E-01 | -4.53E-01 | 1.69E-03 | 1.78E-01 |
| 7.90E-02 | 1.26E-01 | -6.45E-02 | 3.26E-01 | 4.29E-01 | -4.46E-01 | 4.31E-03 | 1.78E-01 |
| -3.12E-01 | 1.10E-01 | -2.48E-02 | 2.93E-01 | 4.16E-01 | -4.38E-01 | 6.94E-03 | 1.78E-01 |
| -6.66E-01 | 5.93E-02 | 2.29E-02 | 2.52E-01 | 4.02E-01 | -4.30E-01 | 9.58E-03 | 1.78E-01 |
| -6.14E-01 | 1.46E-02 | 6.74E-02 | 2.05E-01 | 3.86E-01 | -4.22E-01 | 1.22E-02 | 1.78E-01 |
| -5.65E-01 | -1.11E-02 | 1.01E-01 | 1.53E-01 | 3.69E-01 | -4.13E-01 | 1.49E-02 | 1.78E-01 |
| -1.13E-01 | -1.78E-02 | 1.18E-01 | 9.91E-02 | 3.51E-01 | -4.04E-01 | 1.75E-02 | 1.78E-01 |
| -5.65E-02 | -9.79E-03 | 1.15E-01 | 4.50E-02 | 3.32E-01 | -3.94E-01 | 2.02E-02 | 1.78E-01 |
| 1.17E-02 | 4.60E-03 | 9.28E-02 | -8.17E-03 | 3.12E-01 | -3.84E-01 | 2.28E-02 | 1.78E-01 |
| 4.99E-01 | 1.58E-02 | 5.58E-02 | -5.97E-02 | 2.90E-01 | -3.73E-01 | 2.55E-02 | 1.78E-01 |
| 2.04E-01 | 1.45E-02 | 8.59E-03 | -1.09E-01 | 2.68E-01 | -3.63E-01 | 2.81E-02 | 1.78E-01 |
| -7.52E-02 | -9.76E-04 | -4.38E-02 | -1.54E-01 | 2.44E-01 | -3.51E-01 | 3.08E-02 | 1.78E-01 |
| -3.44E-01 | -3.02E-02 | -9.62E-02 | -1.96E-01 | 2.20E-01 | -3.40E-01 | 3.35E-02 | 1.78E-01 |
| 1.87E-01 | -6.47E-02 | -1.44E-01 | -2.33E-01 | 1.95E-01 | -3.28E-01 | 3.61E-02 | 1.78E-01 |
| 2.65E-01 | -6.27E-02 | -1.82E-01 | -2.64E-01 | 1.70E-01 | -3.16E-01 | 3.88E-02 | 1.78E-01 |
| 2.54E-01 | 1.04E-02 | -2.08E-01 | -2.88E-01 | 1.43E-01 | -3.03E-01 | 4.14E-02 | 1.78E-01 |
| -2.08E-01 | 1.04E-01 | -2.12E-01 | -3.05E-01 | 1.16E-01 | -2.90E-01 | 4.41E-02 | 1.78E-01 |
| 1.79E-01 | 1.10E-01 | -1.82E-01 | -3.15E-01 | 8.82E-02 | -2.77E-01 | 4.67E-02 | 1.78E-01 |
| -1.48E-01 | -1.65E-02 | -1.16E-01 | -3.18E-01 | 6.00E-02 | -2.64E-01 | 4.94E-02 | 1.78E-01 |
| -1.30E-01 | -1.18E-01 | -2.25E-02 | -3.15E-01 | 3.13E-02 | -2.50E-01 | 5.20E-02 | 1.77E-01 |
| 1.12E-01 | -6.01E-02 | 8.48E-02 | -3.07E-01 | 2.28E-03 | -2.37E-01 | 5.47E-02 | 1.77E-01 |
| -1.30E-01 | 8.57E-02 | 1.82E-01 | -2.96E-01 | -2.69E-02 | -2.22E-01 | 5.73E-02 | 1.77E-01 |
| 1.76E-01 | 1.17E-01 | 2.44E-01 | -2.81E-01 | -5.62E-02 | -2.08E-01 | 5.99E-02 | 1.77E-01 |
| -2.31E-01 | 1.15E-01 | 2.47E-01 | -2.65E-01 | -8.54E-02 | -1.94E-01 | 6.25E-02 | 1.77E-01 |
| 2.71E-01 | 7.35E-02 | 1.84E-01 | -2.47E-01 | -1.14E-01 | -1.79E-01 | 6.51E-02 | 1.77E-01 |
| -2.82E-01 | -7.82E-02 | 7.56E-02 | -2.28E-01 | -1.43E-01 | -1.64E-01 | 6.77E-02 | 1.77E-01 |
| 2.70E-01 | -1.15E-01 | -4.85E-02 | -2.06E-01 | -1.71E-01 | -1.49E-01 | 7.03E-02 | 1.77E-01 |
| -1.58E-01 | 6.13E-03 | -1.60E-01 | -1.80E-01 | -1.99E-01 | -1.34E-01 | 7.29E-02 | 1.77E-01 |
| -2.24E-01 | 1.22E-01 | -2.30E-01 | -1.51E-01 | -2.26E-01 | -1.18E-01 | 7.54E-02 | 1.77E-01 |
| 1.89E-01 | 9.03E-02 | -2.35E-01 | -1.16E-01 | -2.52E-01 | -1.03E-01 | 7.80E-02 | 1.77E-01 |
| 2.08E-01 | -7.10E-03 | -1.89E-01 | -7.64E-02 | -2.77E-01 | -8.72E-02 | 8.05E-02 | 1.77E-01 |
| 1.87E-01 | -1.03E-01 | -1.10E-01 | -3.25E-02 | -3.02E-01 | -7.15E-02 | 8.31E-02 | 1.77E-01 |
| 1.10E-01 | -1.61E-01 | -1.85E-02 | 1.47E-02 | -3.25E-01 | -5.57E-02 | 8.56E-02 | 1.77E-01 |
| -3.43E-02 | -1.48E-01 | 6.80E-02 | 6.43E-02 | -3.47E-01 | -3.98E-02 | 8.81E-02 | 1.76E-01 |
| -2.60E-01 | -4.19E-02 | 1.39E-01 | 1.15E-01 | -3.67E-01 | -2.38E-02 | 9.06E-02 | 1.76E-01 |
| 2.67E-01 | 1.39E-01 | 1.85E-01 | 1.66E-01 | -3.86E-01 | -7.80E-03 | 9.30E-02 | 1.76E-01 |
| 1.06E-01 | 2.34E-01 | 1.98E-01 | 2.17E-01 | -4.04E-01 | 8.26E-03 | 9.55E-02 | 1.76E-01 |
| -2.54E-01 | 1.66E-01 | 1.74E-01 | 2.65E-01 | -4.19E-01 | 2.44E-02 | 9.79E-02 | 1.76E-01 |
| -1.32E-02 | -7.03E-02 | 1.20E-01 | 3.09E-01 | -4.33E-01 | 4.05E-02 | 1.00E-01 | 1.76E-01 |
| 2.35E-01 | -2.93E-01 | 4.96E-02 | 3.48E-01 | -4.45E-01 | 5.66E-02 | 1.03E-01 | 1.76E-01 |
| -1.08E-01 | -3.17E-01 | -2.58E-02 | 3.80E-01 | -4.55E-01 | 7.27E-02 | 1.05E-01 | 1.76E-01 |
| -2.52E-01 | -1.39E-01 | -9.49E-02 | 4.04E-01 | -4.62E-01 | 8.89E-02 | 1.07E-01 | 1.76E-01 |
| 2.80E-01 | 1.60E-01 | -1.50E-01 | 4.18E-01 | -4.68E-01 | 1.05E-01 | 1.10E-01 | 1.75E-01 |
| -3.07E-01 | 3.60E-01 | -1.82E-01 | 4.21E-01 | -4.70E-01 | 1.21E-01 | 1.12E-01 | 1.75E-01 |
| -3.03E-01 | 3.53E-01 | -1.88E-01 | 4.11E-01 | -4.71E-01 | 1.37E-01 | 1.14E-01 | 1.75E-01 |
| 2.97E-01 | 1.36E-01 | -1.67E-01 | 3.89E-01 | -4.69E-01 | 1.53E-01 | 1.17E-01 | 1.75E-01 |
| 1.42E-01 | -1.44E-01 | -1.23E-01 | 3.56E-01 | -4.64E-01 | 1.69E-01 | 1.19E-01 | 1.75E-01 |
| -1.01E-01 | -3.46E-01 | -6.10E-02 | 3.13E-01 | -4.57E-01 | 1.85E-01 | 1.21E-01 | 1.75E-01 |
| -1.41E-01 | -3.58E-01 | 1.46E-02 | 2.62E-01 | -4.48E-01 | 2.00E-01 | 1.23E-01 | 1.75E-01 |
| 1.55E-02 | -1.66E-01 | 9.56E-02 | 2.05E-01 | -4.37E-01 | 2.16E-01 | 1.25E-01 | 1.74E-01 |
| 9.22E-02 | 1.16E-01 | 1.70E-01 | 1.44E-01 | -4.24E-01 | 2.31E-01 | 1.28E-01 | 1.74E-01 |
| -1.29E-01 | 3.13E-01 | 2.26E-01 | 8.04E-02 | -4.10E-01 | 2.46E-01 | 1.30E-01 | 1.74E-01 |
| -3.32E-02 | 2.22E-01 | 2.54E-01 | 1.54E-02 | -3.93E-01 | 2.61E-01 | 1.32E-01 | 1.74E-01 |
| 2.65E-01 | -4.87E-02 | 2.56E-01 | -4.99E-02 | -3.76E-01 | 2.76E-01 | 1.34E-01 | 1.74E-01 |
| -2.95E-01 | -2.48E-01 | 2.41E-01 | -1.15E-01 | -3.56E-01 | 2.91E-01 | 1.36E-01 | 1.74E-01 |
| 1.80E-02 | -1.04E-01 | 2.13E-01 | -1.78E-01 | -3.36E-01 | 3.05E-01 | 1.38E-01 | 1.73E-01 |
| 2.20E-01 | 1.52E-01 | 1.81E-01 | -2.40E-01 | -3.14E-01 | 3.20E-01 | 1.40E-01 | 1.73E-01 |
| -1.63E-01 | 1.85E-01 | 1.50E-01 | -2.99E-01 | -2.92E-01 | 3.33E-01 | 1.42E-01 | 1.73E-01 |
| 1.33E-01 | -6.72E-02 | 1.24E-01 | -3.55E-01 | -2.68E-01 | 3.47E-01 | 1.44E-01 | 1.73E-01 |
| -1.41E-01 | -1.51E-01 | 9.19E-02 | -4.08E-01 | -2.44E-01 | 3.60E-01 | 1.46E-01 | 1.73E-01 |
| 1.69E-01 | -3.11E-03 | 4.52E-02 | -4.56E-01 | -2.19E-01 | 3.74E-01 | 1.47E-01 | 1.73E-01 |
| 1.27E-01 | 1.04E-01 | -1.70E-02 | -4.98E-01 | -1.94E-01 | 3.86E-01 | 1.49E-01 | 1.72E-01 |
| -2.14E-01 | 1.16E-01 | -9.27E-02 | -5.36E-01 | -1.68E-01 | 3.99E-01 | 1.51E-01 | 1.72E-01 |
| -9.78E-02 | 7.61E-02 | -1.78E-01 | -5.66E-01 | -1.42E-01 | 4.11E-01 | 1.53E-01 | 1.72E-01 |
| 3.67E-02 | 1.32E-02 | -2.65E-01 | -5.90E-01 | -1.16E-01 | 4.22E-01 | 1.55E-01 | 1.72E-01 |
| 1.58E-01 | -4.95E-02 | -3.46E-01 | -6.06E-01 | -8.97E-02 | 4.34E-01 | 1.56E-01 | 1.72E-01 |
| 2.34E-01 | -8.90E-02 | -4.14E-01 | -6.14E-01 | -6.35E-02 | 4.44E-01 | 1.58E-01 | 1.71E-01 |
| 2.33E-01 | -8.06E-02 | -4.61E-01 | -6.13E-01 | -3.73E-02 | 4.55E-01 | 1.59E-01 | 1.71E-01 |
| -2.56E-01 | -1.55E-02 | -4.87E-01 | -6.02E-01 | -1.13E-02 | 4.65E-01 | 1.61E-01 | 1.71E-01 |
| 3.67E-02 | 4.49E-02 | -4.94E-01 | -5.82E-01 | 1.45E-02 | 4.74E-01 | 1.62E-01 | 1.71E-01 |
| 3.38E-01 | 7.24E-02 | -4.86E-01 | -5.53E-01 | 3.99E-02 | 4.83E-01 | 1.64E-01 | 1.71E-01 |
| 2.57E-01 | 5.80E-02 | -4.63E-01 | -5.15E-01 | 6.50E-02 | 4.92E-01 | 1.65E-01 | 1.70E-01 |
| 1.83E-01 | 1.64E-02 | -4.27E-01 | -4.69E-01 | 8.96E-02 | 5.00E-01 | 1.67E-01 | 1.70E-01 |
| 9.70E-02 | -3.09E-02 | -3.80E-01 | -4.16E-01 | 1.14E-01 | 5.08E-01 | 1.68E-01 | 1.70E-01 |
| -4.17E-01 | -6.51E-02 | -3.25E-01 | -3.56E-01 | 1.37E-01 | 5.15E-01 | 1.69E-01 | 1.70E-01 |
| -5.70E-01 | -6.82E-02 | -2.63E-01 | -2.92E-01 | 1.60E-01 | 5.21E-01 | 1.71E-01 | 1.69E-01 |
| -3.69E-01 | -2.99E-02 | -1.98E-01 | -2.23E-01 | 1.82E-01 | 5.27E-01 | 1.72E-01 | 1.69E-01 |
| -1.91E-01 | 2.89E-02 | -1.32E-01 | -1.51E-01 | 2.03E-01 | 5.32E-01 | 1.73E-01 | 1.69E-01 |
| -5.59E-03 | 7.95E-02 | -6.71E-02 | -7.58E-02 | 2.23E-01 | 5.37E-01 | 1.74E-01 | 1.69E-01 |
| 2.19E-01 | 9.33E-02 | -4.37E-03 | 1.14E-03 | 2.42E-01 | 5.41E-01 | 1.75E-01 | 1.68E-01 |
| 5.15E-01 | 4.15E-02 | 5.38E-02 | 7.91E-02 | 2.60E-01 | 5.44E-01 | 1.76E-01 | 1.68E-01 |
| 7.90E-02 | -7.52E-02 | 1.06E-01 | 1.57E-01 | 2.76E-01 | 5.47E-01 | 1.77E-01 | 1.68E-01 |
| -3.99E-01 | -1.39E-01 | 1.49E-01 | 2.35E-01 | 2.92E-01 | 5.49E-01 | 1.78E-01 | 1.68E-01 |
| -2.15E-01 | -4.70E-02 | 1.84E-01 | 3.10E-01 | 3.06E-01 | 5.51E-01 | 1.79E-01 | 1.67E-01 |
| 3.03E-01 | 1.22E-01 | 2.12E-01 | 3.84E-01 | 3.19E-01 | 5.52E-01 | 1.80E-01 | 1.67E-01 |
| -2.96E-01 | 2.12E-01 | 2.39E-01 | 4.54E-01 | 3.30E-01 | 5.52E-01 | 1.81E-01 | 1.67E-01 |
| 1.88E-01 | 2.73E-02 | 2.66E-01 | 5.20E-01 | 3.40E-01 | 5.51E-01 | 1.81E-01 | 1.67E-01 |
| 3.51E-01 | -2.34E-01 | 2.96E-01 | 5.81E-01 | 3.48E-01 | 5.49E-01 | 1.82E-01 | 1.66E-01 |
| -7.02E-02 | -3.10E-01 | 3.31E-01 | 6.36E-01 | 3.54E-01 | 5.47E-01 | 1.83E-01 | 1.66E-01 |
| -3.74E-01 | -9.69E-02 | 3.71E-01 | 6.84E-01 | 3.59E-01 | 5.44E-01 | 1.83E-01 | 1.66E-01 |
| 3.31E-01 | 3.18E-01 | 4.18E-01 | 7.25E-01 | 3.62E-01 | 5.40E-01 | 1.84E-01 | 1.66E-01 |
| -2.60E-01 | 4.25E-01 | 4.71E-01 | 7.58E-01 | 3.62E-01 | 5.36E-01 | 1.84E-01 | 1.65E-01 |
| 1.92E-01 | 2.98E-01 | 5.31E-01 | 7.81E-01 | 3.61E-01 | 5.30E-01 | 1.85E-01 | 1.65E-01 |
| -1.56E-01 | 1.82E-01 | 5.90E-01 | 7.94E-01 | 3.57E-01 | 5.24E-01 | 1.85E-01 | 1.65E-01 |
| 1.47E-01 | -1.59E-01 | 6.38E-01 | 7.97E-01 | 3.52E-01 | 5.17E-01 | 1.86E-01 | 1.64E-01 |
| 1.29E-01 | -5.45E-01 | 6.66E-01 | 7.87E-01 | 3.44E-01 | 5.09E-01 | 1.86E-01 | 1.64E-01 |
| -1.74E-01 | -6.01E-01 | 6.64E-01 | 7.64E-01 | 3.33E-01 | 5.01E-01 | 1.86E-01 | 1.64E-01 |
| -1.74E-01 | -1.01E-01 | 6.22E-01 | 7.29E-01 | 3.21E-01 | 4.92E-01 | 1.86E-01 | 1.64E-01 |
| 1.72E-01 | 5.12E-01 | 5.37E-01 | 6.84E-01 | 3.08E-01 | 4.82E-01 | 1.87E-01 | 1.63E-01 |
| -1.65E-01 | 6.59E-01 | 4.06E-01 | 6.29E-01 | 2.92E-01 | 4.72E-01 | 1.87E-01 | 1.63E-01 |
| 1.65E-01 | 1.88E-01 | 2.37E-01 | 5.65E-01 | 2.75E-01 | 4.61E-01 | 1.87E-01 | 1.63E-01 |
| -1.76E-01 | -3.88E-01 | 4.86E-02 | 4.94E-01 | 2.57E-01 | 4.50E-01 | 1.87E-01 | 1.62E-01 |
| -1.81E-02 | -6.53E-01 | -1.37E-01 | 4.16E-01 | 2.37E-01 | 4.37E-01 | 1.87E-01 | 1.62E-01 |
| 2.22E-01 | -6.14E-01 | -3.00E-01 | 3.34E-01 | 2.17E-01 | 4.25E-01 | 1.87E-01 | 1.62E-01 |
| -2.48E-01 | -2.98E-01 | -4.27E-01 | 2.47E-01 | 1.95E-01 | 4.12E-01 | 1.87E-01 | 1.61E-01 |
| 2.75E-01 | 1.96E-01 | -5.13E-01 | 1.57E-01 | 1.73E-01 | 3.98E-01 | 1.86E-01 | 1.61E-01 |
| -3.06E-01 | 5.47E-01 | -5.57E-01 | 6.63E-02 | 1.50E-01 | 3.84E-01 | 1.86E-01 | 1.61E-01 |
| 3.35E-01 | 4.38E-01 | -5.56E-01 | -2.54E-02 | 1.27E-01 | 3.69E-01 | 1.86E-01 | 1.60E-01 |
| 3.62E-02 | 2.05E-02 | -5.13E-01 | -1.17E-01 | 1.03E-01 | 3.54E-01 | 1.86E-01 | 1.60E-01 |
| -3.51E-01 | -3.48E-01 | -4.32E-01 | -2.07E-01 | 7.90E-02 | 3.39E-01 | 1.85E-01 | 1.60E-01 |
| 9.76E-02 | -3.81E-01 | -3.16E-01 | -2.95E-01 | 5.50E-02 | 3.23E-01 | 1.85E-01 | 1.59E-01 |
| 2.89E-01 | -1.85E-01 | -1.76E-01 | -3.80E-01 | 3.11E-02 | 3.07E-01 | 1.85E-01 | 1.59E-01 |
| 1.42E-02 | 5.86E-02 | -2.25E-02 | -4.61E-01 | 7.45E-03 | 2.90E-01 | 1.84E-01 | 1.59E-01 |
| -1.93E-01 | 2.29E-01 | 1.30E-01 | -5.37E-01 | -1.58E-02 | 2.73E-01 | 1.84E-01 | 1.58E-01 |
| 1.65E-01 | 2.44E-01 | 2.68E-01 | -6.04E-01 | -3.86E-02 | 2.56E-01 | 1.83E-01 | 1.58E-01 |
| -1.65E-01 | 1.61E-01 | 3.78E-01 | -6.62E-01 | -6.07E-02 | 2.39E-01 | 1.83E-01 | 1.57E-01 |
| 1.15E-02 | 5.09E-03 | 4.44E-01 | -7.10E-01 | -8.19E-02 | 2.21E-01 | 1.82E-01 | 1.57E-01 |
| 2.31E-01 | -1.46E-01 | 4.51E-01 | -7.46E-01 | -1.02E-01 | 2.04E-01 | 1.82E-01 | 1.57E-01 |
| 1.53E-02 | -2.03E-01 | 3.83E-01 | -7.69E-01 | -1.21E-01 | 1.85E-01 | 1.81E-01 | 1.56E-01 |
| -2.87E-01 | -1.05E-01 | 2.34E-01 | -7.80E-01 | -1.39E-01 | 1.67E-01 | 1.80E-01 | 1.56E-01 |
| -2.74E-01 | 1.21E-01 | 3.18E-02 | -7.81E-01 | -1.56E-01 | 1.49E-01 | 1.79E-01 | 1.56E-01 |
| 2.49E-01 | 2.33E-01 | -1.75E-01 | -7.73E-01 | -1.71E-01 | 1.30E-01 | 1.79E-01 | 1.55E-01 |
| -1.98E-01 | 5.93E-02 | -3.42E-01 | -7.56E-01 | -1.85E-01 | 1.12E-01 | 1.78E-01 | 1.55E-01 |
| 1.60E-01 | -1.94E-01 | -4.40E-01 | -7.31E-01 | -1.97E-01 | 9.31E-02 | 1.77E-01 | 1.54E-01 |
| -1.64E-01 | -2.74E-01 | -4.40E-01 | -6.99E-01 | -2.07E-01 | 7.44E-02 | 1.76E-01 | 1.54E-01 |
| 1.08E-01 | -2.66E-01 | -3.25E-01 | -6.61E-01 | -2.16E-01 | 5.56E-02 | 1.75E-01 | 1.54E-01 |
| 2.23E-01 | -1.89E-01 | -1.32E-01 | -6.17E-01 | -2.24E-01 | 3.68E-02 | 1.74E-01 | 1.53E-01 |
| -1.99E-01 | -1.47E-02 | 9.39E-02 | -5.69E-01 | -2.30E-01 | 1.80E-02 | 1.73E-01 | 1.53E-01 |
| 1.31E-01 | 2.23E-01 | 3.04E-01 | -5.17E-01 | -2.35E-01 | -7.19E-04 | 1.72E-01 | 1.52E-01 |
| -7.64E-02 | 2.52E-01 | 4.51E-01 | -4.61E-01 | -2.39E-01 | -1.94E-02 | 1.71E-01 | 1.52E-01 |
| 7.91E-02 | 1.16E-02 | 5.00E-01 | -4.03E-01 | -2.42E-01 | -3.80E-02 | 1.70E-01 | 1.52E-01 |
| -1.22E-01 | -1.96E-01 | 4.68E-01 | -3.43E-01 | -2.43E-01 | -5.66E-02 | 1.69E-01 | 1.51E-01 |
| -1.11E-01 | -1.61E-01 | 3.80E-01 | -2.82E-01 | -2.43E-01 | -7.50E-02 | 1.68E-01 | 1.51E-01 |
| 1.91E-01 | 2.41E-02 | 2.51E-01 | -2.19E-01 | -2.42E-01 | -9.32E-02 | 1.67E-01 | 1.50E-01 |
| -1.93E-01 | 1.04E-01 | 1.08E-01 | -1.56E-01 | -2.40E-01 | -1.11E-01 | 1.66E-01 | 1.50E-01 |
| 5.50E-03 | -3.74E-03 | -2.95E-02 | -9.24E-02 | -2.37E-01 | -1.29E-01 | 1.65E-01 | 1.50E-01 |
| 1.86E-01 | -8.06E-02 | -1.81E-01 | -2.92E-02 | -2.33E-01 | -1.47E-01 | 1.63E-01 | 1.49E-01 |
| -2.09E-01 | 4.22E-02 | -3.59E-01 | 3.34E-02 | -2.28E-01 | -1.64E-01 | 1.62E-01 | 1.49E-01 |
| 2.45E-01 | 1.05E-01 | -5.23E-01 | 9.49E-02 | -2.22E-01 | -1.81E-01 | 1.61E-01 | 1.48E-01 |
| 5.00E-02 | -4.43E-02 | -6.29E-01 | 1.55E-01 | -2.16E-01 | -1.98E-01 | 1.59E-01 | 1.48E-01 |
| -2.70E-01 | -1.60E-01 | -6.43E-01 | 2.13E-01 | -2.08E-01 | -2.15E-01 | 1.58E-01 | 1.47E-01 |
| 2.42E-01 | -1.13E-02 | -5.46E-01 | 2.70E-01 | -1.99E-01 | -2.31E-01 | 1.57E-01 | 1.47E-01 |
| -1.98E-01 | 2.06E-01 | -3.69E-01 | 3.24E-01 | -1.90E-01 | -2.47E-01 | 1.55E-01 | 1.47E-01 |
| -9.34E-02 | 2.47E-01 | -1.57E-01 | 3.75E-01 | -1.80E-01 | -2.62E-01 | 1.54E-01 | 1.46E-01 |
| 1.33E-01 | 1.73E-01 | 5.19E-02 | 4.23E-01 | -1.69E-01 | -2.78E-01 | 1.52E-01 | 1.46E-01 |
| -4.18E-03 | 8.31E-02 | 2.41E-01 | 4.66E-01 | -1.58E-01 | -2.92E-01 | 1.51E-01 | 1.45E-01 |
| -1.08E-01 | -1.05E-02 | 4.05E-01 | 5.04E-01 | -1.46E-01 | -3.07E-01 | 1.49E-01 | 1.45E-01 |
| -1.68E-01 | -1.14E-01 | 5.39E-01 | 5.36E-01 | -1.33E-01 | -3.20E-01 | 1.48E-01 | 1.44E-01 |
| -1.85E-01 | -2.21E-01 | 6.39E-01 | 5.62E-01 | -1.20E-01 | -3.34E-01 | 1.46E-01 | 1.44E-01 |
| 2.22E-01 | -3.05E-01 | 7.01E-01 | 5.81E-01 | -1.07E-01 | -3.47E-01 | 1.45E-01 | 1.43E-01 |
| -1.87E-01 | -3.29E-01 | 7.21E-01 | 5.92E-01 | -9.23E-02 | -3.59E-01 | 1.43E-01 | 1.43E-01 |
| -2.25E-01 | -2.78E-01 | 7.04E-01 | 5.95E-01 | -7.75E-02 | -3.71E-01 | 1.42E-01 | 1.42E-01 |
| -3.13E-01 | -1.40E-01 | 6.57E-01 | 5.89E-01 | -6.24E-02 | -3.82E-01 | 1.40E-01 | 1.42E-01 |
| -5.29E-02 | 7.86E-02 | 5.92E-01 | 5.76E-01 | -4.68E-02 | -3.93E-01 | 1.38E-01 | 1.41E-01 |
| 2.48E-01 | 2.69E-01 | 5.19E-01 | 5.57E-01 | -3.10E-02 | -4.03E-01 | 1.37E-01 | 1.41E-01 |
| 3.09E-01 | 2.96E-01 | 4.52E-01 | 5.31E-01 | -1.50E-02 | -4.13E-01 | 1.35E-01 | 1.41E-01 |
| 1.94E-01 | 8.87E-02 | 4.00E-01 | 4.99E-01 | 1.16E-03 | -4.22E-01 | 1.33E-01 | 1.40E-01 |
| -2.77E-01 | -1.77E-01 | 3.63E-01 | 4.62E-01 | 1.73E-02 | -4.31E-01 | 1.32E-01 | 1.40E-01 |
| 2.72E-01 | -2.66E-01 | 3.41E-01 | 4.20E-01 | 3.35E-02 | -4.39E-01 | 1.30E-01 | 1.39E-01 |
| -2.82E-01 | -6.37E-02 | 3.31E-01 | 3.75E-01 | 4.95E-02 | -4.46E-01 | 1.28E-01 | 1.39E-01 |
| -6.42E-02 | 1.69E-01 | 3.24E-01 | 3.26E-01 | 6.52E-02 | -4.53E-01 | 1.26E-01 | 1.38E-01 |
| 3.23E-01 | 2.42E-01 | 3.11E-01 | 2.74E-01 | 8.07E-02 | -4.59E-01 | 1.24E-01 | 1.38E-01 |
| -2.39E-01 | 7.27E-02 | 2.85E-01 | 2.19E-01 | 9.58E-02 | -4.64E-01 | 1.23E-01 | 1.37E-01 |
| -3.30E-01 | -1.51E-01 | 2.46E-01 | 1.63E-01 | 1.10E-01 | -4.69E-01 | 1.21E-01 | 1.37E-01 |
| -1.58E-01 | -2.25E-01 | 1.98E-01 | 1.06E-01 | 1.24E-01 | -4.73E-01 | 1.19E-01 | 1.36E-01 |
| -1.20E-01 | -1.58E-01 | 1.42E-01 | 4.81E-02 | 1.38E-01 | -4.76E-01 | 1.17E-01 | 1.36E-01 |
| 2.43E-01 | -7.89E-03 | 8.20E-02 | -9.96E-03 | 1.50E-01 | -4.79E-01 | 1.15E-01 | 1.35E-01 |
| -2.03E-01 | 1.46E-01 | 2.18E-02 | -6.75E-02 | 1.62E-01 | -4.80E-01 | 1.13E-01 | 1.35E-01 |
| -1.57E-01 | 2.04E-01 | -3.26E-02 | -1.24E-01 | 1.73E-01 | -4.81E-01 | 1.11E-01 | 1.34E-01 |
| -3.46E-02 | 1.73E-01 | -7.68E-02 | -1.79E-01 | 1.83E-01 | -4.82E-01 | 1.09E-01 | 1.34E-01 |
| 1.23E-01 | 9.66E-02 | -1.12E-01 | -2.31E-01 | 1.92E-01 | -4.81E-01 | 1.07E-01 | 1.33E-01 |
| -1.22E-01 | 1.10E-02 | -1.40E-01 | -2.81E-01 | 2.00E-01 | -4.80E-01 | 1.06E-01 | 1.33E-01 |
| 2.99E-02 | -7.68E-02 | -1.64E-01 | -3.28E-01 | 2.06E-01 | -4.78E-01 | 1.04E-01 | 1.32E-01 |
| 1.56E-01 | -1.44E-01 | -1.86E-01 | -3.70E-01 | 2.11E-01 | -4.75E-01 | 1.02E-01 | 1.31E-01 |
| -1.78E-01 | -1.56E-01 | -2.08E-01 | -4.08E-01 | 2.15E-01 | -4.71E-01 | 9.96E-02 | 1.31E-01 |
| 2.00E-01 | -8.14E-02 | -2.31E-01 | -4.41E-01 | 2.17E-01 | -4.66E-01 | 9.76E-02 | 1.30E-01 |
| 1.38E-01 | 2.84E-02 | -2.54E-01 | -4.69E-01 | 2.18E-01 | -4.61E-01 | 9.55E-02 | 1.30E-01 |
| 9.80E-02 | 1.10E-01 | -2.78E-01 | -4.90E-01 | 2.17E-01 | -4.55E-01 | 9.35E-02 | 1.29E-01 |
| -2.72E-01 | 1.14E-01 | -3.01E-01 | -5.05E-01 | 2.14E-01 | -4.47E-01 | 9.15E-02 | 1.29E-01 |
| 2.37E-01 | 2.93E-02 | -3.17E-01 | -5.12E-01 | 2.10E-01 | -4.39E-01 | 8.94E-02 | 1.28E-01 |
| 3.22E-01 | -5.43E-02 | -3.19E-01 | -5.11E-01 | 2.03E-01 | -4.30E-01 | 8.74E-02 | 1.28E-01 |
| 3.20E-01 | -8.34E-02 | -2.95E-01 | -5.03E-01 | 1.95E-01 | -4.21E-01 | 8.53E-02 | 1.27E-01 |
| -1.69E-01 | -6.40E-02 | -2.40E-01 | -4.88E-01 | 1.85E-01 | -4.10E-01 | 8.33E-02 | 1.27E-01 |
| -3.29E-01 | -6.97E-04 | -1.61E-01 | -4.68E-01 | 1.73E-01 | -3.99E-01 | 8.12E-02 | 1.26E-01 |
| 2.93E-01 | 6.81E-02 | -6.92E-02 | -4.43E-01 | 1.60E-01 | -3.86E-01 | 7.91E-02 | 1.26E-01 |
| -1.74E-01 | 1.61E-02 | 2.39E-02 | -4.14E-01 | 1.45E-01 | -3.74E-01 | 7.70E-02 | 1.25E-01 |
| -1.86E-01 | -7.54E-02 | 1.00E-01 | -3.82E-01 | 1.29E-01 | -3.60E-01 | 7.50E-02 | 1.24E-01 |
| 1.42E-01 | -7.13E-02 | 1.43E-01 | -3.48E-01 | 1.11E-01 | -3.46E-01 | 7.29E-02 | 1.24E-01 |
| -2.90E-02 | 5.95E-02 | 1.54E-01 | -3.13E-01 | 9.32E-02 | -3.31E-01 | 7.08E-02 | 1.23E-01 |
| -1.08E-01 | 1.24E-01 | 1.41E-01 | -2.79E-01 | 7.40E-02 | -3.16E-01 | 6.87E-02 | 1.23E-01 |
| -4.32E-02 | 6.28E-02 | 1.10E-01 | -2.44E-01 | 5.41E-02 | -3.01E-01 | 6.66E-02 | 1.22E-01 |
| 1.23E-01 | -8.79E-02 | 6.88E-02 | -2.11E-01 | 3.34E-02 | -2.85E-01 | 6.45E-02 | 1.22E-01 |
| -1.31E-01 | -2.18E-01 | 2.57E-02 | -1.79E-01 | 1.23E-02 | -2.68E-01 | 6.24E-02 | 1.21E-01 |
| 1.38E-01 | -7.07E-02 | -1.18E-02 | -1.48E-01 | -9.33E-03 | -2.51E-01 | 6.02E-02 | 1.20E-01 |
| -1.51E-01 | 2.25E-01 | -3.99E-02 | -1.20E-01 | -3.12E-02 | -2.34E-01 | 5.81E-02 | 1.20E-01 |
| 1.33E-01 | 3.40E-01 | -5.58E-02 | -9.42E-02 | -5.32E-02 | -2.16E-01 | 5.60E-02 | 1.19E-01 |
| 2.13E-01 | 2.47E-01 | -5.80E-02 | -7.10E-02 | -7.53E-02 | -1.99E-01 | 5.39E-02 | 1.19E-01 |
| 2.01E-02 | 1.31E-02 | -4.77E-02 | -5.00E-02 | -9.73E-02 | -1.81E-01 | 5.18E-02 | 1.18E-01 |
| -1.41E-01 | -2.61E-01 | -2.82E-02 | -3.03E-02 | -1.19E-01 | -1.63E-01 | 4.97E-02 | 1.18E-01 |
| -3.75E-01 | -4.69E-01 | -3.01E-03 | -1.01E-02 | -1.40E-01 | -1.44E-01 | 4.76E-02 | 1.17E-01 |
| 4.29E-02 | -5.28E-01 | 2.42E-02 | 1.23E-02 | -1.61E-01 | -1.26E-01 | 4.55E-02 | 1.16E-01 |
| 3.29E-01 | -4.60E-01 | 4.97E-02 | 3.86E-02 | -1.82E-01 | -1.08E-01 | 4.34E-02 | 1.16E-01 |
| 5.30E-01 | -3.07E-01 | 6.98E-02 | 7.04E-02 | -2.01E-01 | -8.94E-02 | 4.13E-02 | 1.15E-01 |
| 2.86E-01 | -1.10E-01 | 8.09E-02 | 1.10E-01 | -2.20E-01 | -7.10E-02 | 3.93E-02 | 1.15E-01 |
| 2.49E-02 | 1.07E-01 | 7.95E-02 | 1.57E-01 | -2.38E-01 | -5.28E-02 | 3.72E-02 | 1.14E-01 |
| -2.24E-01 | 3.17E-01 | 6.43E-02 | 2.12E-01 | -2.55E-01 | -3.46E-02 | 3.51E-02 | 1.13E-01 |
| -4.26E-01 | 4.87E-01 | 3.41E-02 | 2.75E-01 | -2.70E-01 | -1.66E-02 | 3.30E-02 | 1.13E-01 |
| -5.49E-01 | 5.87E-01 | -1.20E-02 | 3.43E-01 | -2.84E-01 | 1.28E-03 | 3.10E-02 | 1.12E-01 |
| -5.60E-01 | 5.84E-01 | -7.14E-02 | 4.15E-01 | -2.97E-01 | 1.89E-02 | 2.89E-02 | 1.12E-01 |
| -3.79E-02 | 4.49E-01 | -1.33E-01 | 4.87E-01 | -3.08E-01 | 3.62E-02 | 2.69E-02 | 1.11E-01 |
| 1.71E-01 | 2.16E-01 | -1.84E-01 | 5.58E-01 | -3.17E-01 | 5.33E-02 | 2.48E-02 | 1.10E-01 |
| 4.00E-01 | -5.84E-02 | -2.13E-01 | 6.25E-01 | -3.25E-01 | 7.00E-02 | 2.28E-02 | 1.10E-01 |
| -2.36E-01 | -3.01E-01 | -2.07E-01 | 6.86E-01 | -3.30E-01 | 8.64E-02 | 2.08E-02 | 1.09E-01 |
| -2.67E-01 | -3.87E-01 | -1.53E-01 | 7.39E-01 | -3.34E-01 | 1.02E-01 | 1.88E-02 | 1.09E-01 |
| 2.15E-01 | -2.26E-01 | -4.49E-02 | 7.80E-01 | -3.35E-01 | 1.18E-01 | 1.68E-02 | 1.08E-01 |
| 1.57E-01 | 5.54E-02 | 9.19E-02 | 8.08E-01 | -3.34E-01 | 1.33E-01 | 1.48E-02 | 1.07E-01 |
| -1.81E-01 | 2.34E-01 | 2.23E-01 | 8.21E-01 | -3.31E-01 | 1.48E-01 | 1.28E-02 | 1.07E-01 |
| 2.05E-01 | 1.45E-01 | 3.17E-01 | 8.15E-01 | -3.26E-01 | 1.63E-01 | 1.09E-02 | 1.06E-01 |
| -5.10E-02 | -2.50E-02 | 3.48E-01 | 7.88E-01 | -3.18E-01 | 1.77E-01 | 8.91E-03 | 1.06E-01 |
| -2.97E-01 | -1.05E-01 | 3.00E-01 | 7.39E-01 | -3.08E-01 | 1.91E-01 | 6.97E-03 | 1.05E-01 |
| -2.06E-01 | -1.70E-02 | 1.66E-01 | 6.71E-01 | -2.96E-01 | 2.04E-01 | 5.05E-03 | 1.04E-01 |
| 3.49E-01 | 6.37E-02 | -5.24E-03 | 5.85E-01 | -2.82E-01 | 2.17E-01 | 3.15E-03 | 1.04E-01 |
| 2.44E-01 | -1.58E-04 | -1.63E-01 | 4.84E-01 | -2.66E-01 | 2.29E-01 | 1.26E-03 | 1.03E-01 |
| -2.85E-01 | -6.71E-02 | -2.85E-01 | 3.71E-01 | -2.49E-01 | 2.41E-01 | -6.19E-04 | 1.02E-01 |
| 2.13E-01 | 9.13E-03 | -3.64E-01 | 2.49E-01 | -2.30E-01 | 2.53E-01 | -2.48E-03 | 1.02E-01 |
| -1.34E-01 | 1.02E-01 | -4.13E-01 | 1.21E-01 | -2.10E-01 | 2.64E-01 | -4.32E-03 | 1.01E-01 |
| 7.99E-02 | 2.02E-02 | -4.43E-01 | -1.08E-02 | -1.88E-01 | 2.75E-01 | -6.14E-03 | 1.01E-01 |
| -6.81E-02 | -1.23E-01 | -4.51E-01 | -1.44E-01 | -1.66E-01 | 2.85E-01 | -7.95E-03 | 9.99E-02 |
| 9.74E-02 | -2.05E-01 | -4.34E-01 | -2.75E-01 | -1.42E-01 | 2.94E-01 | -9.74E-03 | 9.92E-02 |
| 1.46E-01 | -2.06E-01 | -3.85E-01 | -4.03E-01 | -1.17E-01 | 3.04E-01 | -1.15E-02 | 9.86E-02 |
| 1.04E-01 | -1.51E-01 | -3.06E-01 | -5.26E-01 | -9.19E-02 | 3.12E-01 | -1.33E-02 | 9.80E-02 |
| -2.98E-03 | -6.15E-02 | -2.04E-01 | -6.43E-01 | -6.59E-02 | 3.21E-01 | -1.50E-02 | 9.73E-02 |
| -1.55E-01 | 5.20E-02 | -8.87E-02 | -7.52E-01 | -3.95E-02 | 3.28E-01 | -1.67E-02 | 9.67E-02 |
| -3.32E-01 | 1.78E-01 | 3.22E-02 | -8.53E-01 | -1.27E-02 | 3.36E-01 | -1.84E-02 | 9.60E-02 |
| -1.04E-01 | 2.95E-01 | 1.49E-01 | -9.45E-01 | 1.44E-02 | 3.42E-01 | -2.00E-02 | 9.54E-02 |
| 1.96E-01 | 3.44E-01 | 2.54E-01 | -1.03E+00 | 4.15E-02 | 3.49E-01 | -2.17E-02 | 9.47E-02 |
| 2.38E-01 | 2.58E-01 | 3.37E-01 | -1.10E+00 | 6.87E-02 | 3.54E-01 | -2.33E-02 | 9.41E-02 |
| 4.62E-02 | 1.79E-02 | 3.96E-01 | -1.16E+00 | 9.57E-02 | 3.59E-01 | -2.49E-02 | 9.34E-02 |
| -9.61E-02 | -2.56E-01 | 4.27E-01 | -1.20E+00 | 1.22E-01 | 3.64E-01 | -2.65E-02 | 9.27E-02 |
| 5.18E-02 | -4.00E-01 | 4.26E-01 | -1.23E+00 | 1.49E-01 | 3.68E-01 | -2.80E-02 | 9.21E-02 |
| -5.18E-02 | -2.72E-01 | 3.94E-01 | -1.25E+00 | 1.74E-01 | 3.72E-01 | -2.95E-02 | 9.14E-02 |
| 9.18E-02 | 2.44E-02 | 3.35E-01 | -1.26E+00 | 2.00E-01 | 3.75E-01 | -3.10E-02 | 9.08E-02 |
| -1.45E-01 | 3.07E-01 | 2.58E-01 | -1.25E+00 | 2.24E-01 | 3.77E-01 | -3.25E-02 | 9.01E-02 |
| 1.86E-01 | 4.26E-01 | 1.70E-01 | -1.23E+00 | 2.48E-01 | 3.79E-01 | -3.39E-02 | 8.94E-02 |
| -3.96E-02 | 2.93E-01 | 7.79E-02 | -1.21E+00 | 2.71E-01 | 3.80E-01 | -3.53E-02 | 8.88E-02 |
| -1.22E-01 | 7.58E-03 | -1.24E-02 | -1.17E+00 | 2.93E-01 | 3.80E-01 | -3.67E-02 | 8.81E-02 |
| -2.14E-01 | -2.79E-01 | -9.65E-02 | -1.13E+00 | 3.15E-01 | 3.80E-01 | -3.81E-02 | 8.74E-02 |
| -6.23E-02 | -4.25E-01 | -1.69E-01 | -1.08E+00 | 3.36E-01 | 3.80E-01 | -3.94E-02 | 8.68E-02 |
| 2.10E-01 | -3.07E-01 | -2.27E-01 | -1.03E+00 | 3.56E-01 | 3.79E-01 | -4.07E-02 | 8.61E-02 |
| -2.16E-01 | 8.90E-02 | -2.69E-01 | -9.73E-01 | 3.75E-01 | 3.77E-01 | -4.20E-02 | 8.54E-02 |
| 2.28E-01 | 4.00E-01 | -2.96E-01 | -9.12E-01 | 3.93E-01 | 3.74E-01 | -4.32E-02 | 8.47E-02 |
| 1.95E-01 | 3.67E-01 | -3.06E-01 | -8.48E-01 | 4.10E-01 | 3.71E-01 | -4.45E-02 | 8.41E-02 |
| -3.16E-02 | 1.01E-01 | -2.93E-01 | -7.80E-01 | 4.26E-01 | 3.68E-01 | -4.57E-02 | 8.34E-02 |
| -2.53E-01 | -1.98E-01 | -2.55E-01 | -7.10E-01 | 4.42E-01 | 3.63E-01 | -4.68E-02 | 8.27E-02 |
| -2.60E-01 | -3.36E-01 | -1.91E-01 | -6.36E-01 | 4.56E-01 | 3.58E-01 | -4.80E-02 | 8.20E-02 |
| 2.47E-01 | -2.09E-01 | -1.04E-01 | -5.58E-01 | 4.69E-01 | 3.52E-01 | -4.91E-02 | 8.13E-02 |
| 1.99E-01 | 5.70E-02 | -5.81E-03 | -4.76E-01 | 4.81E-01 | 3.46E-01 | -5.02E-02 | 8.07E-02 |
| -2.01E-01 | 2.70E-01 | 9.17E-02 | -3.89E-01 | 4.92E-01 | 3.39E-01 | -5.13E-02 | 8.00E-02 |
| 8.10E-02 | 2.15E-01 | 1.74E-01 | -2.97E-01 | 5.01E-01 | 3.31E-01 | -5.24E-02 | 7.93E-02 |
| 1.68E-01 | -1.98E-02 | 2.27E-01 | -1.99E-01 | 5.10E-01 | 3.23E-01 | -5.34E-02 | 7.86E-02 |
| -1.64E-01 | -2.03E-01 | 2.39E-01 | -9.54E-02 | 5.17E-01 | 3.14E-01 | -5.44E-02 | 7.79E-02 |
| 1.65E-01 | -2.02E-01 | 2.08E-01 | 1.45E-02 | 5.23E-01 | 3.04E-01 | -5.54E-02 | 7.72E-02 |
| 1.50E-03 | -7.81E-02 | 1.38E-01 | 1.31E-01 | 5.27E-01 | 2.94E-01 | -5.64E-02 | 7.65E-02 |
| -1.63E-01 | 6.57E-02 | 4.44E-02 | 2.55E-01 | 5.30E-01 | 2.83E-01 | -5.73E-02 | 7.58E-02 |
| 1.51E-01 | 1.35E-01 | -5.42E-02 | 3.84E-01 | 5.32E-01 | 2.72E-01 | -5.83E-02 | 7.51E-02 |
| 1.66E-01 | 8.61E-02 | -1.41E-01 | 5.18E-01 | 5.32E-01 | 2.59E-01 | -5.92E-02 | 7.44E-02 |
| -1.81E-01 | -2.81E-02 | -2.03E-01 | 6.55E-01 | 5.31E-01 | 2.47E-01 | -6.01E-02 | 7.37E-02 |
| 2.08E-01 | -1.12E-01 | -2.26E-01 | 7.93E-01 | 5.27E-01 | 2.34E-01 | -6.09E-02 | 7.30E-02 |
| 1.97E-02 | -6.29E-02 | -2.05E-01 | 9.31E-01 | 5.22E-01 | 2.20E-01 | -6.18E-02 | 7.23E-02 |
| -2.68E-01 | 5.33E-02 | -1.45E-01 | 1.07E+00 | 5.15E-01 | 2.06E-01 | -6.26E-02 | 7.16E-02 |
| 2.82E-01 | 1.16E-01 | -5.92E-02 | 1.19E+00 | 5.06E-01 | 1.92E-01 | -6.35E-02 | 7.09E-02 |
| -2.28E-01 | 2.93E-02 | 4.14E-02 | 1.32E+00 | 4.96E-01 | 1.77E-01 | -6.43E-02 | 7.02E-02 |
| -2.75E-01 | -9.99E-02 | 1.35E-01 | 1.43E+00 | 4.83E-01 | 1.62E-01 | -6.51E-02 | 6.95E-02 |
| 3.06E-02 | -1.37E-01 | 2.01E-01 | 1.53E+00 | 4.68E-01 | 1.47E-01 | -6.58E-02 | 6.88E-02 |
| 2.79E-01 | -6.03E-02 | 2.29E-01 | 1.61E+00 | 4.50E-01 | 1.31E-01 | -6.66E-02 | 6.81E-02 |
| -2.88E-01 | 8.46E-02 | 2.20E-01 | 1.68E+00 | 4.31E-01 | 1.15E-01 | -6.73E-02 | 6.74E-02 |
| -3.31E-01 | 1.66E-01 | 1.75E-01 | 1.72E+00 | 4.09E-01 | 9.90E-02 | -6.81E-02 | 6.67E-02 |
| -2.37E-01 | 1.66E-01 | 9.84E-02 | 1.75E+00 | 3.85E-01 | 8.28E-02 | -6.88E-02 | 6.60E-02 |
| -4.43E-02 | 1.08E-01 | 3.39E-03 | 1.75E+00 | 3.58E-01 | 6.64E-02 | -6.95E-02 | 6.53E-02 |
| 2.04E-01 | 1.60E-02 | -9.18E-02 | 1.74E+00 | 3.29E-01 | 5.00E-02 | -7.02E-02 | 6.46E-02 |
| 4.66E-01 | -8.58E-02 | -1.69E-01 | 1.70E+00 | 2.98E-01 | 3.35E-02 | -7.09E-02 | 6.38E-02 |
| 2.92E-01 | -1.69E-01 | -2.11E-01 | 1.65E+00 | 2.65E-01 | 1.70E-02 | -7.15E-02 | 6.31E-02 |
| -3.82E-01 | -1.86E-01 | -2.00E-01 | 1.58E+00 | 2.30E-01 | 5.47E-04 | -7.22E-02 | 6.24E-02 |
| -4.06E-01 | -8.26E-02 | -1.37E-01 | 1.49E+00 | 1.94E-01 | -1.59E-02 | -7.28E-02 | 6.17E-02 |
| -1.40E-01 | 1.21E-01 | -4.31E-02 | 1.39E+00 | 1.57E-01 | -3.23E-02 | -7.34E-02 | 6.10E-02 |
| 2.67E-01 | 1.96E-01 | 5.58E-02 | 1.26E+00 | 1.19E-01 | -4.85E-02 | -7.41E-02 | 6.03E-02 |
| -2.00E-01 | -2.27E-02 | 1.33E-01 | 1.12E+00 | 8.04E-02 | -6.46E-02 | -7.47E-02 | 5.95E-02 |
| 1.66E-01 | -2.06E-01 | 1.63E-01 | 9.66E-01 | 4.11E-02 | -8.05E-02 | -7.53E-02 | 5.88E-02 |
| -1.83E-01 | 3.72E-03 | 1.28E-01 | 7.94E-01 | 1.47E-03 | -9.62E-02 | -7.59E-02 | 5.81E-02 |
| -8.25E-02 | 2.19E-01 | 5.46E-02 | 6.09E-01 | -3.82E-02 | -1.12E-01 | -7.65E-02 | 5.74E-02 |
| 2.84E-01 | 1.85E-01 | -2.54E-02 | 4.13E-01 | -7.77E-02 | -1.27E-01 | -7.70E-02 | 5.66E-02 |
| -3.04E-01 | -1.11E-01 | -8.90E-02 | 2.10E-01 | -1.17E-01 | -1.42E-01 | -7.76E-02 | 5.59E-02 |
| 1.04E-01 | -2.28E-01 | -1.16E-01 | 6.83E-04 | -1.55E-01 | -1.56E-01 | -7.82E-02 | 5.52E-02 |
| 2.37E-01 | -1.19E-01 | -9.51E-02 | -2.10E-01 | -1.93E-01 | -1.70E-01 | -7.87E-02 | 5.45E-02 |
| -1.82E-01 | 1.06E-01 | -4.15E-02 | -4.19E-01 | -2.29E-01 | -1.84E-01 | -7.93E-02 | 5.37E-02 |
| -9.29E-02 | 2.07E-01 | 2.01E-02 | -6.23E-01 | -2.65E-01 | -1.97E-01 | -7.98E-02 | 5.30E-02 |
| 1.14E-01 | 1.95E-01 | 6.63E-02 | -8.15E-01 | -2.99E-01 | -2.10E-01 | -8.03E-02 | 5.23E-02 |
| -2.16E-02 | 1.32E-01 | 8.66E-02 | -9.93E-01 | -3.31E-01 | -2.22E-01 | -8.09E-02 | 5.15E-02 |
| -1.31E-01 | 4.51E-02 | 8.35E-02 | -1.15E+00 | -3.61E-01 | -2.34E-01 | -8.14E-02 | 5.08E-02 |
| 1.60E-01 | -4.53E-02 | 6.27E-02 | -1.29E+00 | -3.89E-01 | -2.45E-01 | -8.19E-02 | 5.01E-02 |
| 1.29E-02 | -1.13E-01 | 3.01E-02 | -1.41E+00 | -4.14E-01 | -2.56E-01 | -8.25E-02 | 4.93E-02 |
| -2.18E-01 | -1.19E-01 | -8.54E-03 | -1.50E+00 | -4.37E-01 | -2.65E-01 | -8.30E-02 | 4.86E-02 |
| -1.60E-01 | -4.44E-02 | -4.66E-02 | -1.57E+00 | -4.57E-01 | -2.75E-01 | -8.35E-02 | 4.79E-02 |
| 2.35E-01 | 5.31E-02 | -7.56E-02 | -1.60E+00 | -4.74E-01 | -2.83E-01 | -8.40E-02 | 4.71E-02 |
| 2.21E-01 | 1.05E-01 | -8.72E-02 | -1.61E+00 | -4.87E-01 | -2.91E-01 | -8.45E-02 | 4.64E-02 |
| 2.11E-01 | 9.18E-02 | -7.31E-02 | -1.58E+00 | -4.98E-01 | -2.98E-01 | -8.50E-02 | 4.57E-02 |
| -1.97E-01 | 1.66E-02 | -3.27E-02 | -1.52E+00 | -5.04E-01 | -3.04E-01 | -8.55E-02 | 4.49E-02 |
| 1.83E-01 | -8.40E-02 | 2.03E-02 | -1.44E+00 | -5.08E-01 | -3.09E-01 | -8.61E-02 | 4.42E-02 |
| 1.09E-01 | -1.54E-01 | 6.97E-02 | -1.34E+00 | -5.09E-01 | -3.13E-01 | -8.66E-02 | 4.34E-02 |
| -6.97E-03 | -1.86E-01 | 1.03E-01 | -1.22E+00 | -5.07E-01 | -3.17E-01 | -8.71E-02 | 4.27E-02 |
| -1.41E-01 | -1.96E-01 | 1.13E-01 | -1.09E+00 | -5.02E-01 | -3.19E-01 | -8.76E-02 | 4.19E-02 |
| 1.18E-01 | -1.86E-01 | 9.88E-02 | -9.49E-01 | -4.95E-01 | -3.21E-01 | -8.81E-02 | 4.12E-02 |
| -9.14E-02 | -1.02E-01 | 6.58E-02 | -7.98E-01 | -4.86E-01 | -3.21E-01 | -8.86E-02 | 4.05E-02 |
| -2.28E-02 | 1.12E-01 | 1.94E-02 | -6.42E-01 | -4.75E-01 | -3.21E-01 | -8.91E-02 | 3.97E-02 |
| 5.67E-02 | 3.18E-01 | -3.48E-02 | -4.84E-01 | -4.61E-01 | -3.21E-01 | -8.97E-02 | 3.90E-02 |
| -6.79E-02 | 3.25E-01 | -8.94E-02 | -3.28E-01 | -4.46E-01 | -3.19E-01 | -9.02E-02 | 3.82E-02 |
| 9.95E-02 | 2.83E-02 | -1.31E-01 | -1.75E-01 | -4.29E-01 | -3.17E-01 | -9.07E-02 | 3.75E-02 |
| -1.37E-01 | -2.87E-01 | -1.47E-01 | -2.92E-02 | -4.10E-01 | -3.13E-01 | -9.12E-02 | 3.67E-02 |
| 1.67E-01 | -3.68E-01 | -1.28E-01 | 1.08E-01 | -3.90E-01 | -3.10E-01 | -9.18E-02 | 3.60E-02 |
| -1.45E-01 | -2.67E-01 | -6.98E-02 | 2.36E-01 | -3.69E-01 | -3.05E-01 | -9.23E-02 | 3.52E-02 |
| -1.83E-01 | -5.19E-02 | 1.04E-02 | 3.54E-01 | -3.46E-01 | -3.00E-01 | -9.29E-02 | 3.45E-02 |
| 1.75E-01 | 1.78E-01 | 9.08E-02 | 4.62E-01 | -3.23E-01 | -2.94E-01 | -9.34E-02 | 3.37E-02 |
| -1.63E-01 | 3.32E-01 | 1.49E-01 | 5.58E-01 | -2.98E-01 | -2.88E-01 | -9.40E-02 | 3.30E-02 |
| 1.45E-01 | 2.93E-01 | 1.68E-01 | 6.42E-01 | -2.73E-01 | -2.81E-01 | -9.45E-02 | 3.22E-02 |
| -1.27E-01 | 8.20E-02 | 1.44E-01 | 7.16E-01 | -2.47E-01 | -2.74E-01 | -9.51E-02 | 3.15E-02 |
| 3.75E-02 | -1.22E-01 | 8.72E-02 | 7.79E-01 | -2.21E-01 | -2.65E-01 | -9.56E-02 | 3.07E-02 |
| 1.10E-01 | -2.05E-01 | 1.03E-02 | 8.32E-01 | -1.95E-01 | -2.57E-01 | -9.62E-02 | 3.00E-02 |
| 2.10E-02 | -1.12E-01 | -7.30E-02 | 8.77E-01 | -1.68E-01 | -2.48E-01 | -9.68E-02 | 2.92E-02 |
| -1.43E-01 | 5.03E-02 | -1.41E-01 | 9.12E-01 | -1.41E-01 | -2.38E-01 | -9.74E-02 | 2.85E-02 |
| 1.77E-01 | 1.02E-01 | -1.72E-01 | 9.38E-01 | -1.15E-01 | -2.29E-01 | -9.79E-02 | 2.77E-02 |
| -2.23E-01 | 2.43E-02 | -1.49E-01 | 9.55E-01 | -8.85E-02 | -2.18E-01 | -9.85E-02 | 2.69E-02 |
| -2.44E-01 | -5.75E-02 | -8.93E-02 | 9.64E-01 | -6.26E-02 | -2.08E-01 | -9.91E-02 | 2.62E-02 |
| 2.39E-02 | -3.23E-02 | -1.68E-02 | 9.65E-01 | -3.72E-02 | -1.96E-01 | -9.97E-02 | 2.54E-02 |
| 2.64E-01 | 3.04E-02 | 5.40E-02 | 9.58E-01 | -1.26E-02 | -1.85E-01 | -1.00E-01 | 2.47E-02 |
| -2.25E-01 | 3.97E-02 | 1.11E-01 | 9.45E-01 | 1.13E-02 | -1.73E-01 | -1.01E-01 | 2.39E-02 |
| -2.31E-01 | -7.75E-04 | 1.44E-01 | 9.24E-01 | 3.44E-02 | -1.61E-01 | -1.02E-01 | 2.32E-02 |
| 2.09E-01 | -5.22E-02 | 1.51E-01 | 8.98E-01 | 5.66E-02 | -1.49E-01 | -1.02E-01 | 2.24E-02 |
| -1.94E-01 | -3.91E-02 | 1.40E-01 | 8.65E-01 | 7.79E-02 | -1.37E-01 | -1.03E-01 | 2.16E-02 |
| 1.89E-01 | 7.10E-03 | 1.19E-01 | 8.27E-01 | 9.84E-02 | -1.24E-01 | -1.03E-01 | 2.09E-02 |
| 1.92E-01 | 4.20E-02 | 9.37E-02 | 7.83E-01 | 1.18E-01 | -1.11E-01 | -1.04E-01 | 2.01E-02 |
| -2.01E-01 | 7.71E-02 | 6.70E-02 | 7.35E-01 | 1.36E-01 | -9.79E-02 | -1.05E-01 | 1.94E-02 |
| -1.97E-01 | 1.24E-01 | 3.93E-02 | 6.83E-01 | 1.54E-01 | -8.47E-02 | -1.05E-01 | 1.86E-02 |
| 2.39E-01 | 1.45E-01 | 1.16E-02 | 6.27E-01 | 1.70E-01 | -7.14E-02 | -1.06E-01 | 1.78E-02 |
| -7.13E-02 | 1.12E-01 | -1.51E-02 | 5.69E-01 | 1.85E-01 | -5.80E-02 | -1.07E-01 | 1.71E-02 |
| -3.21E-01 | 1.90E-02 | -3.94E-02 | 5.08E-01 | 1.99E-01 | -4.46E-02 | -1.07E-01 | 1.63E-02 |
| -1.26E-01 | -1.18E-01 | -5.97E-02 | 4.44E-01 | 2.12E-01 | -3.10E-02 | -1.08E-01 | 1.56E-02 |
| 4.14E-02 | -2.29E-01 | -7.40E-02 | 3.80E-01 | 2.23E-01 | -1.75E-02 | -1.09E-01 | 1.48E-02 |
| 5.15E-01 | -2.50E-01 | -8.08E-02 | 3.14E-01 | 2.33E-01 | -4.00E-03 | -1.10E-01 | 1.40E-02 |
| 4.89E-02 | -1.42E-01 | -7.90E-02 | 2.47E-01 | 2.41E-01 | 9.48E-03 | -1.10E-01 | 1.33E-02 |
| -9.68E-02 | 4.25E-02 | -7.00E-02 | 1.81E-01 | 2.48E-01 | 2.29E-02 | -1.11E-01 | 1.25E-02 |
| -6.50E-01 | 2.28E-01 | -5.60E-02 | 1.15E-01 | 2.54E-01 | 3.63E-02 | -1.12E-01 | 1.17E-02 |
| -7.33E-01 | 3.42E-01 | -3.91E-02 | 5.16E-02 | 2.58E-01 | 4.95E-02 | -1.13E-01 | 1.10E-02 |
| -2.85E-01 | 3.25E-01 | -2.10E-02 | -1.00E-02 | 2.60E-01 | 6.26E-02 | -1.13E-01 | 1.02E-02 |
| 7.31E-01 | 1.43E-01 | -3.62E-03 | -6.89E-02 | 2.61E-01 | 7.56E-02 | -1.14E-01 | 9.44E-03 |
| 6.87E-01 | -1.85E-01 | 1.12E-02 | -1.24E-01 | 2.60E-01 | 8.83E-02 | -1.15E-01 | 8.68E-03 |
| -6.20E-01 | -4.53E-01 | 2.15E-02 | -1.76E-01 | 2.57E-01 | 1.01E-01 | -1.16E-01 | 7.91E-03 |
| -1.74E-01 | -4.61E-01 | 2.45E-02 | -2.21E-01 | 2.53E-01 | 1.13E-01 | -1.16E-01 | 7.15E-03 |
| 4.27E-01 | -2.17E-01 | 1.88E-02 | -2.59E-01 | 2.46E-01 | 1.25E-01 | -1.17E-01 | 6.38E-03 |
| -3.22E-01 | 1.68E-01 | 7.74E-03 | -2.89E-01 | 2.38E-01 | 1.37E-01 | -1.18E-01 | 5.62E-03 |
| 2.27E-01 | 4.55E-01 | -4.05E-03 | -3.08E-01 | 2.27E-01 | 1.49E-01 | -1.19E-01 | 4.85E-03 |
| 1.67E-01 | 5.33E-01 | -1.19E-02 | -3.16E-01 | 2.15E-01 | 1.60E-01 | -1.20E-01 | 4.09E-03 |
| -1.15E-01 | 4.14E-01 | -1.25E-02 | -3.11E-01 | 2.01E-01 | 1.71E-01 | -1.21E-01 | 3.32E-03 |
| 1.16E-01 | 1.66E-01 | -7.62E-03 | -2.91E-01 | 1.84E-01 | 1.82E-01 | -1.22E-01 | 2.55E-03 |
| -3.74E-02 | -1.13E-01 | 8.97E-04 | -2.60E-01 | 1.66E-01 | 1.92E-01 | -1.22E-01 | 1.79E-03 |
| -2.18E-01 | -3.77E-01 | 1.24E-02 | -2.18E-01 | 1.47E-01 | 2.01E-01 | -1.23E-01 | 1.02E-03 |
| 2.93E-01 | -5.37E-01 | 2.61E-02 | -1.68E-01 | 1.26E-01 | 2.11E-01 | -1.24E-01 | 2.55E-04 |
| 8.48E-02 | -3.84E-01 | 3.99E-02 | -1.12E-01 | 1.05E-01 | 2.20E-01 | -1.25E-01 | -5.11E-04 |
| -3.85E-01 | 3.72E-02 | 4.41E-02 | -5.28E-02 | 8.33E-02 | 2.28E-01 | -1.26E-01 | -1.28E-03 |
| 3.62E-01 | 4.68E-01 | 2.76E-02 | 7.10E-03 | 6.17E-02 | 2.36E-01 | -1.27E-01 | -2.04E-03 |
| -2.92E-01 | 3.18E-01 | -1.48E-02 | 6.45E-02 | 4.04E-02 | 2.44E-01 | -1.28E-01 | -2.81E-03 |
| 2.04E-01 | -1.61E-01 | -6.82E-02 | 1.16E-01 | 1.97E-02 | 2.51E-01 | -1.29E-01 | -3.58E-03 |
| 6.02E-03 | -3.49E-01 | -1.12E-01 | 1.60E-01 | -2.51E-05 | 2.57E-01 | -1.30E-01 | -4.34E-03 |
| -8.97E-02 | -2.52E-01 | -1.30E-01 | 1.91E-01 | -1.85E-02 | 2.63E-01 | -1.31E-01 | -5.11E-03 |
| 9.13E-02 | -4.96E-02 | -1.16E-01 | 2.09E-01 | -3.54E-02 | 2.68E-01 | -1.32E-01 | -5.88E-03 |
| -1.27E-01 | 1.30E-01 | -6.97E-02 | 2.14E-01 | -5.04E-02 | 2.73E-01 | -1.33E-01 | -6.64E-03 |
| 1.73E-01 | 1.71E-01 | 8.69E-03 | 2.07E-01 | -6.34E-02 | 2.77E-01 | -1.34E-01 | -7.41E-03 |
| -2.07E-01 | 6.95E-02 | 1.14E-01 | 1.91E-01 | -7.43E-02 | 2.80E-01 | -1.35E-01 | -8.18E-03 |
| 2.20E-01 | -3.18E-02 | 2.22E-01 | 1.67E-01 | -8.33E-02 | 2.82E-01 | -1.36E-01 | -8.95E-03 |
| -1.81E-01 | -7.76E-02 | 3.04E-01 | 1.37E-01 | -9.04E-02 | 2.84E-01 | -1.37E-01 | -9.71E-03 |
| -2.00E-01 | -5.44E-02 | 3.40E-01 | 1.03E-01 | -9.57E-02 | 2.86E-01 | -1.38E-01 | -1.05E-02 |
| 1.84E-01 | 1.21E-02 | 3.34E-01 | 6.51E-02 | -9.94E-02 | 2.86E-01 | -1.39E-01 | -1.12E-02 |
| -1.75E-01 | 4.65E-02 | 3.01E-01 | 2.51E-02 | -1.01E-01 | 2.86E-01 | -1.40E-01 | -1.20E-02 |
| -4.54E-02 | 6.40E-03 | 2.57E-01 | -1.69E-02 | -1.02E-01 | 2.84E-01 | -1.42E-01 | -1.28E-02 |
| 1.08E-01 | -5.63E-02 | 2.13E-01 | -6.02E-02 | -1.01E-01 | 2.82E-01 | -1.43E-01 | -1.35E-02 |
| 2.00E-01 | -6.70E-02 | 1.78E-01 | -1.04E-01 | -9.86E-02 | 2.80E-01 | -1.44E-01 | -1.43E-02 |
| -2.16E-01 | 1.29E-02 | 1.58E-01 | -1.48E-01 | -9.50E-02 | 2.76E-01 | -1.45E-01 | -1.51E-02 |
| 1.67E-01 | 9.17E-02 | 1.43E-01 | -1.91E-01 | -9.04E-02 | 2.71E-01 | -1.46E-01 | -1.58E-02 |
| 2.35E-01 | 8.64E-02 | 1.24E-01 | -2.33E-01 | -8.48E-02 | 2.66E-01 | -1.47E-01 | -1.66E-02 |
| 2.42E-02 | -3.36E-02 | 9.35E-02 | -2.73E-01 | -7.83E-02 | 2.60E-01 | -1.49E-01 | -1.74E-02 |
| -2.14E-01 | -1.17E-01 | 5.09E-02 | -3.10E-01 | -7.12E-02 | 2.54E-01 | -1.50E-01 | -1.81E-02 |
| 1.90E-01 | -2.74E-02 | -4.79E-03 | -3.44E-01 | -6.36E-02 | 2.46E-01 | -1.51E-01 | -1.89E-02 |
| 1.47E-01 | 1.16E-01 | -7.28E-02 | -3.74E-01 | -5.55E-02 | 2.39E-01 | -1.52E-01 | -1.97E-02 |
| -1.50E-01 | 1.14E-01 | -1.49E-01 | -3.99E-01 | -4.72E-02 | 2.30E-01 | -1.53E-01 | -2.04E-02 |
| 1.46E-01 | -8.21E-02 | -2.27E-01 | -4.19E-01 | -3.89E-02 | 2.21E-01 | -1.55E-01 | -2.12E-02 |
| -1.50E-01 | -9.66E-02 | -3.01E-01 | -4.33E-01 | -3.05E-02 | 2.12E-01 | -1.56E-01 | -2.20E-02 |
| 1.46E-01 | 9.13E-02 | -3.72E-01 | -4.40E-01 | -2.24E-02 | 2.02E-01 | -1.57E-01 | -2.27E-02 |
| -1.35E-01 | 6.06E-02 | -4.57E-01 | -4.40E-01 | -1.45E-02 | 1.92E-01 | -1.59E-01 | -2.35E-02 |
| 1.30E-01 | -9.04E-02 | -5.74E-01 | -4.33E-01 | -6.90E-03 | 1.81E-01 | -1.60E-01 | -2.42E-02 |
| -1.50E-01 | -7.07E-02 | -7.26E-01 | -4.17E-01 | 3.52E-04 | 1.70E-01 | -1.61E-01 | -2.50E-02 |
| -1.00E-01 | 2.70E-02 | -8.91E-01 | -3.92E-01 | 7.23E-03 | 1.59E-01 | -1.62E-01 | -2.58E-02 |
| 3.39E-01 | 1.09E-01 | -1.04E+00 | -3.58E-01 | 1.37E-02 | 1.47E-01 | -1.64E-01 | -2.65E-02 |
| 3.82E-01 | 1.25E-01 | -1.13E+00 | -3.15E-01 | 1.98E-02 | 1.35E-01 | -1.65E-01 | -2.73E-02 |
| 4.38E-01 | 6.01E-02 | -1.17E+00 | -2.60E-01 | 2.54E-02 | 1.23E-01 | -1.66E-01 | -2.81E-02 |
| 4.75E-01 | -5.21E-02 | -1.15E+00 | -1.96E-01 | 3.05E-02 | 1.11E-01 | -1.67E-01 | -2.88E-02 |
| 4.41E-01 | -1.56E-01 | -1.08E+00 | -1.22E-01 | 3.51E-02 | 9.91E-02 | -1.69E-01 | -2.96E-02 |
| -5.41E-01 | -1.70E-01 | -9.55E-01 | -4.08E-02 | 3.92E-02 | 8.68E-02 | -1.70E-01 | -3.03E-02 |
| -9.23E-02 | -3.90E-02 | -8.06E-01 | 4.65E-02 | 4.26E-02 | 7.44E-02 | -1.71E-01 | -3.11E-02 |
| -8.93E-02 | 1.27E-01 | -6.54E-01 | 1.38E-01 | 4.56E-02 | 6.21E-02 | -1.73E-01 | -3.19E-02 |
| 4.49E-01 | 1.78E-01 | -5.22E-01 | 2.33E-01 | 4.78E-02 | 4.97E-02 | -1.74E-01 | -3.26E-02 |
| -3.82E-01 | 2.61E-02 | -4.27E-01 | 3.30E-01 | 4.95E-02 | 3.74E-02 | -1.75E-01 | -3.34E-02 |
| 4.63E-02 | -1.68E-01 | -3.43E-01 | 4.27E-01 | 5.05E-02 | 2.52E-02 | -1.76E-01 | -3.41E-02 |
| 2.61E-01 | -1.68E-01 | -2.38E-01 | 5.23E-01 | 5.09E-02 | 1.30E-02 | -1.78E-01 | -3.49E-02 |
| -2.37E-01 | 1.01E-01 | -8.63E-02 | 6.15E-01 | 5.05E-02 | 9.39E-04 | -1.79E-01 | -3.57E-02 |
| 2.39E-01 | 1.44E-01 | 1.25E-01 | 7.04E-01 | 4.95E-02 | -1.10E-02 | -1.80E-01 | -3.64E-02 |
| -2.47E-01 | -1.07E-01 | 3.93E-01 | 7.87E-01 | 4.78E-02 | -2.28E-02 | -1.82E-01 | -3.72E-02 |
| 2.46E-01 | -1.33E-01 | 6.70E-01 | 8.63E-01 | 4.54E-02 | -3.44E-02 | -1.83E-01 | -3.79E-02 |
| -2.31E-01 | 4.61E-02 | 9.17E-01 | 9.30E-01 | 4.23E-02 | -4.59E-02 | -1.84E-01 | -3.87E-02 |
| -1.46E-01 | 1.33E-01 | 1.11E+00 | 9.87E-01 | 3.85E-02 | -5.73E-02 | -1.85E-01 | -3.94E-02 |
| 1.37E-01 | 1.05E-01 | 1.23E+00 | 1.03E+00 | 3.40E-02 | -6.84E-02 | -1.87E-01 | -4.02E-02 |
| 1.63E-01 | 1.19E-02 | 1.28E+00 | 1.06E+00 | 2.87E-02 | -7.93E-02 | -1.88E-01 | -4.09E-02 |
| -1.51E-01 | -7.93E-02 | 1.28E+00 | 1.08E+00 | 2.28E-02 | -9.00E-02 | -1.89E-01 | -4.17E-02 |
| -4.86E-02 | -1.37E-01 | 1.26E+00 | 1.08E+00 | 1.60E-02 | -1.00E-01 | -1.90E-01 | -4.24E-02 |
| 6.21E-02 | -1.71E-01 | 1.21E+00 | 1.07E+00 | 8.63E-03 | -1.11E-01 | -1.92E-01 | -4.32E-02 |
| 1.65E-01 | -1.81E-01 | 1.17E+00 | 1.04E+00 | 6.35E-04 | -1.21E-01 | -1.93E-01 | -4.39E-02 |
| -1.75E-01 | -1.46E-01 | 1.14E+00 | 9.97E-01 | -7.87E-03 | -1.30E-01 | -1.94E-01 | -4.47E-02 |
| 1.84E-01 | 2.57E-04 | 1.11E+00 | 9.39E-01 | -1.68E-02 | -1.40E-01 | -1.95E-01 | -4.54E-02 |
| 1.08E-01 | 1.93E-01 | 1.08E+00 | 8.70E-01 | -2.61E-02 | -1.49E-01 | -1.96E-01 | -4.62E-02 |
| -1.94E-01 | 2.26E-01 | 1.05E+00 | 7.89E-01 | -3.56E-02 | -1.58E-01 | -1.97E-01 | -4.69E-02 |
| 1.91E-01 | -2.00E-03 | 1.01E+00 | 6.98E-01 | -4.52E-02 | -1.66E-01 | -1.99E-01 | -4.77E-02 |
| -1.80E-01 | -2.46E-01 | 9.36E-01 | 5.99E-01 | -5.50E-02 | -1.74E-01 | -2.00E-01 | -4.84E-02 |
| 3.66E-02 | -2.37E-01 | 8.38E-01 | 4.91E-01 | -6.47E-02 | -1.82E-01 | -2.01E-01 | -4.92E-02 |
| 1.37E-01 | -7.92E-02 | 7.14E-01 | 3.76E-01 | -7.44E-02 | -1.89E-01 | -2.02E-01 | -4.99E-02 |
| -1.16E-01 | 5.22E-02 | 5.72E-01 | 2.55E-01 | -8.38E-02 | -1.96E-01 | -2.03E-01 | -5.07E-02 |
| 1.04E-01 | 1.29E-01 | 4.18E-01 | 1.30E-01 | -9.30E-02 | -2.03E-01 | -2.04E-01 | -5.14E-02 |
| -1.09E-01 | 2.46E-01 | 2.59E-01 | 3.78E-04 | -1.02E-01 | -2.09E-01 | -2.05E-01 | -5.22E-02 |
| 1.52E-01 | 2.89E-01 | 1.02E-01 | -1.32E-01 | -1.10E-01 | -2.15E-01 | -2.06E-01 | -5.29E-02 |
| 1.57E-01 | 1.79E-01 | -4.63E-02 | -2.65E-01 | -1.18E-01 | -2.20E-01 | -2.07E-01 | -5.37E-02 |
| -1.89E-01 | 5.64E-03 | -1.83E-01 | -3.99E-01 | -1.25E-01 | -2.25E-01 | -2.08E-01 | -5.44E-02 |
| 2.18E-01 | -1.34E-01 | -3.03E-01 | -5.33E-01 | -1.32E-01 | -2.30E-01 | -2.09E-01 | -5.51E-02 |
| -2.38E-01 | -2.36E-01 | -4.06E-01 | -6.65E-01 | -1.38E-01 | -2.34E-01 | -2.10E-01 | -5.59E-02 |
| 3.68E-02 | -2.91E-01 | -4.87E-01 | -7.94E-01 | -1.42E-01 | -2.37E-01 | -2.11E-01 | -5.66E-02 |
| 2.10E-01 | -2.73E-01 | -5.44E-01 | -9.20E-01 | -1.46E-01 | -2.40E-01 | -2.12E-01 | -5.73E-02 |
| 2.50E-01 | -1.50E-01 | -5.79E-01 | -1.04E+00 | -1.49E-01 | -2.42E-01 | -2.13E-01 | -5.81E-02 |
| -2.37E-01 | 7.21E-02 | -5.96E-01 | -1.16E+00 | -1.51E-01 | -2.44E-01 | -2.14E-01 | -5.88E-02 |
| 1.01E-01 | 2.47E-01 | -5.95E-01 | -1.26E+00 | -1.51E-01 | -2.45E-01 | -2.15E-01 | -5.96E-02 |
| 1.88E-01 | 2.44E-01 | -5.78E-01 | -1.36E+00 | -1.51E-01 | -2.46E-01 | -2.16E-01 | -6.03E-02 |
| 6.42E-02 | 1.68E-02 | -5.38E-01 | -1.46E+00 | -1.48E-01 | -2.46E-01 | -2.17E-01 | -6.10E-02 |
| -1.36E-01 | -1.79E-01 | -4.66E-01 | -1.54E+00 | -1.45E-01 | -2.46E-01 | -2.17E-01 | -6.18E-02 |
| 1.34E-01 | -9.09E-02 | -3.60E-01 | -1.60E+00 | -1.39E-01 | -2.45E-01 | -2.18E-01 | -6.25E-02 |
| -1.60E-01 | 1.25E-01 | -2.38E-01 | -1.65E+00 | -1.32E-01 | -2.44E-01 | -2.19E-01 | -6.32E-02 |
| 1.99E-01 | 7.64E-02 | -1.20E-01 | -1.69E+00 | -1.23E-01 | -2.42E-01 | -2.20E-01 | -6.40E-02 |
| 2.51E-01 | -7.96E-02 | -1.38E-02 | -1.70E+00 | -1.12E-01 | -2.40E-01 | -2.20E-01 | -6.47E-02 |
| -2.66E-01 | -8.03E-02 | 7.89E-02 | -1.70E+00 | -9.86E-02 | -2.37E-01 | -2.21E-01 | -6.54E-02 |
| 2.38E-01 | 8.72E-02 | 1.60E-01 | -1.66E+00 | -8.35E-02 | -2.34E-01 | -2.22E-01 | -6.61E-02 |
| -1.88E-01 | -4.88E-02 | 2.37E-01 | -1.60E+00 | -6.67E-02 | -2.30E-01 | -2.22E-01 | -6.69E-02 |
| 1.60E-01 | -1.31E-01 | 2.57E-01 | -1.50E+00 | -4.84E-02 | -2.26E-01 | -2.23E-01 | -6.76E-02 |
| -1.88E-01 | 1.56E-01 | 1.67E-01 | -1.37E+00 | -2.87E-02 | -2.22E-01 | -2.24E-01 | -6.83E-02 |
| 2.59E-01 | 9.59E-02 | -2.04E-03 | -1.21E+00 | -7.85E-03 | -2.17E-01 | -2.24E-01 | -6.90E-02 |
| -3.30E-01 | -1.88E-01 | -1.46E-01 | -1.03E+00 | 1.39E-02 | -2.12E-01 | -2.25E-01 | -6.98E-02 |
| 1.52E-01 | -7.35E-02 | -1.75E-01 | -8.17E-01 | 3.65E-02 | -2.06E-01 | -2.25E-01 | -7.05E-02 |
| 3.83E-01 | 1.86E-01 | -1.15E-01 | -5.91E-01 | 5.95E-02 | -2.01E-01 | -2.26E-01 | -7.12E-02 |
| -3.66E-01 | 1.71E-01 | -1.73E-02 | -3.56E-01 | 8.30E-02 | -1.95E-01 | -2.26E-01 | -7.19E-02 |
| 3.36E-01 | -8.38E-02 | 7.58E-02 | -1.20E-01 | 1.07E-01 | -1.88E-01 | -2.27E-01 | -7.26E-02 |
| 8.91E-02 | -1.40E-01 | 1.20E-01 | 1.09E-01 | 1.30E-01 | -1.82E-01 | -2.27E-01 | -7.34E-02 |
| -2.74E-01 | -6.12E-03 | 1.06E-01 | 3.24E-01 | 1.53E-01 | -1.75E-01 | -2.27E-01 | -7.41E-02 |
| 2.40E-01 | 1.07E-01 | 5.65E-02 | 5.22E-01 | 1.76E-01 | -1.68E-01 | -2.28E-01 | -7.48E-02 |
| -1.97E-01 | -6.54E-03 | -4.02E-03 | 7.02E-01 | 1.99E-01 | -1.60E-01 | -2.28E-01 | -7.55E-02 |
| 1.48E-01 | -8.83E-02 | -5.62E-02 | 8.65E-01 | 2.20E-01 | -1.53E-01 | -2.28E-01 | -7.62E-02 |
| -1.06E-01 | 2.18E-02 | -8.53E-02 | 1.01E+00 | 2.41E-01 | -1.45E-01 | -2.29E-01 | -7.69E-02 |
| 8.20E-02 | 8.19E-02 | -8.72E-02 | 1.14E+00 | 2.60E-01 | -1.37E-01 | -2.29E-01 | -7.76E-02 |
| -4.79E-03 | 4.77E-03 | -6.22E-02 | 1.25E+00 | 2.78E-01 | -1.29E-01 | -2.29E-01 | -7.83E-02 |
| -8.97E-02 | -7.85E-02 | -1.72E-02 | 1.35E+00 | 2.94E-01 | -1.21E-01 | -2.29E-01 | -7.90E-02 |
| 1.09E-01 | -3.95E-02 | 3.71E-02 | 1.44E+00 | 3.08E-01 | -1.13E-01 | -2.29E-01 | -7.98E-02 |
| -1.31E-01 | 5.76E-02 | 8.21E-02 | 1.52E+00 | 3.21E-01 | -1.04E-01 | -2.30E-01 | -8.05E-02 |
| 1.56E-01 | 6.72E-02 | 9.91E-02 | 1.59E+00 | 3.31E-01 | -9.58E-02 | -2.30E-01 | -8.12E-02 |
| 1.71E-01 | -2.67E-03 | 7.52E-02 | 1.65E+00 | 3.39E-01 | -8.73E-02 | -2.30E-01 | -8.19E-02 |
| -1.89E-01 | -5.63E-02 | 2.07E-02 | 1.71E+00 | 3.44E-01 | -7.88E-02 | -2.30E-01 | -8.26E-02 |
| 2.05E-01 | -2.95E-02 | -4.69E-02 | 1.75E+00 | 3.47E-01 | -7.02E-02 | -2.30E-01 | -8.33E-02 |
| 1.78E-01 | 2.61E-02 | -1.04E-01 | 1.77E+00 | 3.46E-01 | -6.16E-02 | -2.30E-01 | -8.40E-02 |
| -2.27E-01 | 4.64E-02 | -1.29E-01 | 1.77E+00 | 3.43E-01 | -5.30E-02 | -2.30E-01 | -8.47E-02 |
| 2.25E-01 | -8.00E-03 | -1.07E-01 | 1.75E+00 | 3.36E-01 | -4.45E-02 | -2.30E-01 | -8.54E-02 |
| -1.48E-01 | -5.14E-02 | -5.07E-02 | 1.71E+00 | 3.26E-01 | -3.59E-02 | -2.30E-01 | -8.61E-02 |
| -1.87E-01 | -1.78E-02 | 2.13E-02 | 1.65E+00 | 3.12E-01 | -2.74E-02 | -2.30E-01 | -8.67E-02 |
| 1.56E-01 | 6.68E-02 | 8.84E-02 | 1.57E+00 | 2.96E-01 | -1.89E-02 | -2.30E-01 | -8.74E-02 |
| -1.27E-01 | 2.38E-02 | 1.31E-01 | 1.46E+00 | 2.78E-01 | -1.04E-02 | -2.29E-01 | -8.81E-02 |
| 1.16E-01 | -8.69E-02 | 1.44E-01 | 1.33E+00 | 2.57E-01 | -2.00E-03 | -2.29E-01 | -8.88E-02 |
| -1.31E-01 | -5.23E-02 | 1.26E-01 | 1.17E+00 | 2.33E-01 | 6.36E-03 | -2.29E-01 | -8.95E-02 |
| 4.48E-03 | 4.84E-02 | 8.50E-02 | 9.92E-01 | 2.08E-01 | 1.47E-02 | -2.29E-01 | -9.02E-02 |
| 2.13E-01 | 1.08E-01 | 2.97E-02 | 7.98E-01 | 1.81E-01 | 2.29E-02 | -2.28E-01 | -9.09E-02 |
| 1.42E-01 | 6.36E-02 | -2.96E-02 | 5.92E-01 | 1.52E-01 | 3.10E-02 | -2.28E-01 | -9.16E-02 |
| 1.25E-01 | -3.42E-02 | -8.01E-02 | 3.78E-01 | 1.22E-01 | 3.90E-02 | -2.28E-01 | -9.22E-02 |
| -3.39E-01 | -1.05E-01 | -1.08E-01 | 1.61E-01 | 8.99E-02 | 4.70E-02 | -2.28E-01 | -9.29E-02 |
| -1.14E-01 | -9.11E-02 | -1.04E-01 | -5.70E-02 | 5.71E-02 | 5.48E-02 | -2.27E-01 | -9.36E-02 |
| 2.93E-02 | -2.25E-02 | -7.56E-02 | -2.71E-01 | 2.34E-02 | 6.25E-02 | -2.27E-01 | -9.43E-02 |
| 1.50E-01 | 4.83E-02 | -3.41E-02 | -4.77E-01 | -1.11E-02 | 7.01E-02 | -2.26E-01 | -9.50E-02 |
| 3.10E-01 | 7.01E-02 | 7.07E-03 | -6.72E-01 | -4.61E-02 | 7.76E-02 | -2.26E-01 | -9.56E-02 |
| -2.62E-01 | 1.85E-02 | 3.49E-02 | -8.52E-01 | -8.15E-02 | 8.49E-02 | -2.25E-01 | -9.63E-02 |
| -2.31E-02 | -4.01E-02 | 4.52E-02 | -1.01E+00 | -1.17E-01 | 9.20E-02 | -2.25E-01 | -9.70E-02 |
| 1.60E-01 | -4.36E-02 | 3.64E-02 | -1.16E+00 | -1.53E-01 | 9.90E-02 | -2.24E-01 | -9.77E-02 |
| -1.33E-01 | 2.08E-02 | 1.15E-02 | -1.28E+00 | -1.88E-01 | 1.06E-01 | -2.24E-01 | -9.83E-02 |
| -1.47E-04 | 3.48E-02 | -1.16E-02 | -1.37E+00 | -2.23E-01 | 1.13E-01 | -2.23E-01 | -9.90E-02 |
| 1.43E-01 | -8.20E-04 | -2.20E-02 | -1.44E+00 | -2.57E-01 | 1.19E-01 | -2.22E-01 | -9.97E-02 |
| -1.61E-01 | -3.39E-02 | -1.75E-02 | -1.48E+00 | -2.91E-01 | 1.25E-01 | -2.22E-01 | -1.00E-01 |
| -1.62E-01 | -1.32E-02 | -1.50E-04 | -1.49E+00 | -3.23E-01 | 1.31E-01 | -2.21E-01 | -1.01E-01 |
| 1.85E-01 | 2.79E-02 | 1.96E-02 | -1.47E+00 | -3.55E-01 | 1.37E-01 | -2.20E-01 | -1.02E-01 |
| 1.33E-01 | 4.36E-02 | 3.07E-02 | -1.43E+00 | -3.85E-01 | 1.43E-01 | -2.19E-01 | -1.02E-01 |
| 9.51E-02 | 3.39E-02 | 2.54E-02 | -1.35E+00 | -4.13E-01 | 1.48E-01 | -2.19E-01 | -1.03E-01 |
| 6.53E-02 | 3.05E-03 | 6.83E-03 | -1.25E+00 | -4.40E-01 | 1.53E-01 | -2.18E-01 | -1.04E-01 |
| 2.94E-02 | -3.72E-02 | -1.92E-02 | -1.13E+00 | -4.65E-01 | 1.58E-01 | -2.17E-01 | -1.04E-01 |
| -2.93E-02 | -7.28E-02 | -4.72E-02 | -9.86E-01 | -4.88E-01 | 1.63E-01 | -2.16E-01 | -1.05E-01 |
| -1.28E-01 | -8.91E-02 | -7.21E-02 | -8.30E-01 | -5.09E-01 | 1.67E-01 | -2.15E-01 | -1.06E-01 |
| 1.17E-01 | -6.83E-02 | -9.00E-02 | -6.61E-01 | -5.27E-01 | 1.71E-01 | -2.14E-01 | -1.06E-01 |
| -1.14E-01 | 3.59E-03 | -9.65E-02 | -4.84E-01 | -5.44E-01 | 1.75E-01 | -2.13E-01 | -1.07E-01 |
| 1.37E-02 | 9.58E-02 | -8.91E-02 | -2.99E-01 | -5.57E-01 | 1.79E-01 | -2.12E-01 | -1.08E-01 |
| 1.50E-01 | 1.58E-01 | -6.50E-02 | -1.12E-01 | -5.68E-01 | 1.82E-01 | -2.11E-01 | -1.08E-01 |
| -6.30E-02 | 1.47E-01 | -2.32E-02 | 7.52E-02 | -5.77E-01 | 1.85E-01 | -2.10E-01 | -1.09E-01 |
| -2.19E-01 | 6.80E-02 | 3.11E-02 | 2.58E-01 | -5.82E-01 | 1.88E-01 | -2.09E-01 | -1.09E-01 |
| -3.24E-01 | -5.89E-02 | 8.67E-02 | 4.33E-01 | -5.85E-01 | 1.90E-01 | -2.08E-01 | -1.10E-01 |
| 4.04E-01 | -1.96E-01 | 1.32E-01 | 5.98E-01 | -5.84E-01 | 1.92E-01 | -2.06E-01 | -1.11E-01 |
| -1.16E-01 | -2.57E-01 | 1.55E-01 | 7.47E-01 | -5.79E-01 | 1.94E-01 | -2.05E-01 | -1.11E-01 |
| -2.79E-01 | -2.27E-01 | 1.47E-01 | 8.79E-01 | -5.72E-01 | 1.95E-01 | -2.04E-01 | -1.12E-01 |
| -4.70E-01 | -1.27E-01 | 1.13E-01 | 9.91E-01 | -5.61E-01 | 1.96E-01 | -2.03E-01 | -1.13E-01 |
| -6.69E-01 | 1.92E-02 | 5.87E-02 | 1.08E+00 | -5.46E-01 | 1.97E-01 | -2.01E-01 | -1.13E-01 |
| -4.52E-01 | 1.82E-01 | -8.20E-03 | 1.15E+00 | -5.27E-01 | 1.97E-01 | -2.00E-01 | -1.14E-01 |
| -1.60E-01 | 2.96E-01 | -8.05E-02 | 1.20E+00 | -5.04E-01 | 1.97E-01 | -1.99E-01 | -1.15E-01 |
| 2.76E-01 | 2.83E-01 | -1.46E-01 | 1.21E+00 | -4.77E-01 | 1.97E-01 | -1.97E-01 | -1.15E-01 |
| 5.11E-01 | 6.22E-02 | -1.81E-01 | 1.20E+00 | -4.46E-01 | 1.96E-01 | -1.96E-01 | -1.16E-01 |
| -3.87E-01 | -2.63E-01 | -1.58E-01 | 1.16E+00 | -4.11E-01 | 1.96E-01 | -1.94E-01 | -1.16E-01 |
| 2.67E-01 | -1.75E-01 | -6.76E-02 | 1.10E+00 | -3.73E-01 | 1.95E-01 | -1.93E-01 | -1.17E-01 |
| -2.04E-01 | 2.25E-01 | 5.38E-02 | 1.00E+00 | -3.31E-01 | 1.93E-01 | -1.91E-01 | -1.18E-01 |
| 2.13E-01 | 1.72E-01 | 1.58E-01 | 8.93E-01 | -2.86E-01 | 1.92E-01 | -1.90E-01 | -1.18E-01 |
| -2.52E-01 | -1.37E-01 | 2.08E-01 | 7.66E-01 | -2.39E-01 | 1.90E-01 | -1.88E-01 | -1.19E-01 |
| -7.94E-02 | -1.88E-01 | 1.75E-01 | 6.29E-01 | -1.89E-01 | 1.88E-01 | -1.86E-01 | -1.20E-01 |
| -5.11E-02 | 1.52E-03 | 5.24E-02 | 4.84E-01 | -1.38E-01 | 1.85E-01 | -1.85E-01 | -1.20E-01 |
| -6.69E-03 | 2.05E-01 | -9.86E-02 | 3.35E-01 | -8.48E-02 | 1.82E-01 | -1.83E-01 | -1.21E-01 |
| 2.14E-01 | 1.93E-01 | -2.10E-01 | 1.86E-01 | -3.08E-02 | 1.80E-01 | -1.81E-01 | -1.21E-01 |
| -1.46E-01 | -1.05E-01 | -2.63E-01 | 4.03E-02 | 2.40E-02 | 1.76E-01 | -1.79E-01 | -1.22E-01 |
| 1.10E-01 | -2.89E-01 | -2.48E-01 | -9.97E-02 | 7.92E-02 | 1.73E-01 | -1.78E-01 | -1.23E-01 |
| -1.53E-01 | -3.15E-02 | -1.65E-01 | -2.30E-01 | 1.34E-01 | 1.70E-01 | -1.76E-01 | -1.23E-01 |
| 2.38E-01 | 3.30E-01 | -4.41E-02 | -3.51E-01 | 1.89E-01 | 1.66E-01 | -1.74E-01 | -1.24E-01 |
| -2.75E-01 | 3.78E-01 | 7.86E-02 | -4.62E-01 | 2.44E-01 | 1.62E-01 | -1.72E-01 | -1.24E-01 |
| -1.02E-01 | 1.60E-01 | 1.73E-01 | -5.63E-01 | 2.97E-01 | 1.58E-01 | -1.70E-01 | -1.25E-01 |
| 1.51E-01 | -1.16E-01 | 2.40E-01 | -6.55E-01 | 3.49E-01 | 1.53E-01 | -1.68E-01 | -1.26E-01 |
| -7.33E-02 | -3.05E-01 | 2.85E-01 | -7.36E-01 | 3.99E-01 | 1.49E-01 | -1.66E-01 | -1.26E-01 |
| 1.39E-02 | -3.96E-01 | 3.16E-01 | -8.08E-01 | 4.46E-01 | 1.44E-01 | -1.64E-01 | -1.27E-01 |
| 3.03E-02 | -4.17E-01 | 3.41E-01 | -8.70E-01 | 4.92E-01 | 1.39E-01 | -1.62E-01 | -1.27E-01 |
| -9.03E-03 | -3.89E-01 | 3.65E-01 | -9.22E-01 | 5.34E-01 | 1.34E-01 | -1.60E-01 | -1.28E-01 |
| -1.08E-01 | -3.10E-01 | 3.92E-01 | -9.64E-01 | 5.74E-01 | 1.28E-01 | -1.58E-01 | -1.29E-01 |
| 1.59E-01 | -2.02E-01 | 4.19E-01 | -9.96E-01 | 6.10E-01 | 1.23E-01 | -1.56E-01 | -1.29E-01 |
| 1.47E-02 | -8.63E-02 | 4.43E-01 | -1.02E+00 | 6.42E-01 | 1.17E-01 | -1.54E-01 | -1.30E-01 |
| -1.19E-01 | 2.05E-02 | 4.59E-01 | -1.03E+00 | 6.69E-01 | 1.11E-01 | -1.52E-01 | -1.30E-01 |
| -2.24E-01 | 1.05E-01 | 4.64E-01 | -1.04E+00 | 6.93E-01 | 1.05E-01 | -1.50E-01 | -1.31E-01 |
| -2.89E-01 | 1.59E-01 | 4.52E-01 | -1.03E+00 | 7.13E-01 | 9.94E-02 | -1.48E-01 | -1.31E-01 |
| -3.19E-01 | 1.93E-01 | 4.20E-01 | -1.01E+00 | 7.29E-01 | 9.32E-02 | -1.45E-01 | -1.32E-01 |
| 9.34E-02 | 2.04E-01 | 3.64E-01 | -9.84E-01 | 7.41E-01 | 8.68E-02 | -1.43E-01 | -1.33E-01 |
| 1.62E-01 | 1.71E-01 | 2.87E-01 | -9.47E-01 | 7.50E-01 | 8.03E-02 | -1.41E-01 | -1.33E-01 |
| 3.10E-01 | 7.36E-02 | 1.90E-01 | -8.99E-01 | 7.55E-01 | 7.37E-02 | -1.39E-01 | -1.34E-01 |
| -2.90E-01 | -6.76E-02 | 7.33E-02 | -8.43E-01 | 7.56E-01 | 6.70E-02 | -1.37E-01 | -1.34E-01 |
| -1.58E-01 | -1.21E-01 | -6.31E-02 | -7.77E-01 | 7.54E-01 | 6.02E-02 | -1.34E-01 | -1.35E-01 |
| 2.48E-01 | -3.95E-02 | -2.13E-01 | -7.03E-01 | 7.48E-01 | 5.33E-02 | -1.32E-01 | -1.36E-01 |
| -2.42E-01 | 1.09E-01 | -3.42E-01 | -6.19E-01 | 7.39E-01 | 4.64E-02 | -1.30E-01 | -1.36E-01 |
| 1.78E-01 | 9.18E-02 | -4.18E-01 | -5.28E-01 | 7.27E-01 | 3.93E-02 | -1.27E-01 | -1.37E-01 |
| 2.44E-01 | -4.35E-02 | -4.26E-01 | -4.28E-01 | 7.12E-01 | 3.23E-02 | -1.25E-01 | -1.37E-01 |
| -2.29E-01 | -1.21E-01 | -3.62E-01 | -3.20E-01 | 6.93E-01 | 2.51E-02 | -1.23E-01 | -1.38E-01 |
| 1.98E-01 | 3.30E-02 | -2.26E-01 | -2.07E-01 | 6.72E-01 | 1.79E-02 | -1.20E-01 | -1.38E-01 |
| -1.61E-01 | 1.34E-01 | -5.56E-02 | -8.90E-02 | 6.47E-01 | 1.07E-02 | -1.18E-01 | -1.39E-01 |
| 1.30E-01 | -3.19E-03 | 1.06E-01 | 3.07E-02 | 6.20E-01 | 3.53E-03 | -1.16E-01 | -1.39E-01 |
| 5.48E-02 | -1.39E-01 | 2.32E-01 | 1.50E-01 | 5.90E-01 | -3.69E-03 | -1.13E-01 | -1.40E-01 |
| -9.32E-02 | -1.42E-01 | 3.04E-01 | 2.68E-01 | 5.57E-01 | -1.09E-02 | -1.11E-01 | -1.41E-01 |
| 8.04E-02 | 7.63E-04 | 3.17E-01 | 3.82E-01 | 5.21E-01 | -1.81E-02 | -1.08E-01 | -1.41E-01 |
| -7.17E-02 | 1.24E-01 | 2.82E-01 | 4.89E-01 | 4.83E-01 | -2.53E-02 | -1.06E-01 | -1.42E-01 |
| -6.98E-02 | 1.38E-01 | 2.13E-01 | 5.88E-01 | 4.43E-01 | -3.24E-02 | -1.03E-01 | -1.42E-01 |
| 9.07E-02 | 2.48E-02 | 1.25E-01 | 6.76E-01 | 4.00E-01 | -3.95E-02 | -1.01E-01 | -1.43E-01 |
| -1.28E-01 | -9.00E-02 | 3.03E-02 | 7.53E-01 | 3.55E-01 | -4.66E-02 | -9.84E-02 | -1.43E-01 |
| -8.93E-03 | -1.30E-01 | -6.04E-02 | 8.17E-01 | 3.07E-01 | -5.36E-02 | -9.59E-02 | -1.44E-01 |
| 5.53E-02 | -1.14E-01 | -1.36E-01 | 8.67E-01 | 2.58E-01 | -6.05E-02 | -9.34E-02 | -1.44E-01 |
| 4.86E-01 | -6.73E-02 | -1.90E-01 | 9.02E-01 | 2.06E-01 | -6.73E-02 | -9.09E-02 | -1.45E-01 |
| 4.96E-01 | -9.62E-03 | -2.18E-01 | 9.20E-01 | 1.52E-01 | -7.40E-02 | -8.84E-02 | -1.45E-01 |
| 5.05E-01 | 4.36E-02 | -2.20E-01 | 9.20E-01 | 9.69E-02 | -8.06E-02 | -8.58E-02 | -1.46E-01 |
| 1.22E-01 | 8.31E-02 | -1.98E-01 | 9.01E-01 | 4.02E-02 | -8.71E-02 | -8.33E-02 | -1.46E-01 |
| -6.52E-01 | 1.10E-01 | -1.55E-01 | 8.64E-01 | -1.77E-02 | -9.35E-02 | -8.08E-02 | -1.47E-01 |
| 1.94E-01 | 1.26E-01 | -9.74E-02 | 8.10E-01 | -7.62E-02 | -9.97E-02 | -7.82E-02 | -1.48E-01 |
| 6.51E-01 | 1.34E-01 | -2.98E-02 | 7.43E-01 | -1.35E-01 | -1.06E-01 | -7.57E-02 | -1.48E-01 |
| 7.19E-01 | 1.34E-01 | 4.26E-02 | 6.65E-01 | -1.94E-01 | -1.12E-01 | -7.31E-02 | -1.49E-01 |
| 8.02E-01 | 1.28E-01 | 1.15E-01 | 5.79E-01 | -2.53E-01 | -1.18E-01 | -7.05E-02 | -1.49E-01 |
| 4.97E-01 | 1.19E-01 | 1.82E-01 | 4.85E-01 | -3.11E-01 | -1.23E-01 | -6.80E-02 | -1.50E-01 |
| 2.04E-01 | 1.10E-01 | 2.41E-01 | 3.86E-01 | -3.67E-01 | -1.28E-01 | -6.54E-02 | -1.50E-01 |
| -4.79E-01 | 1.03E-01 | 2.87E-01 | 2.85E-01 | -4.23E-01 | -1.34E-01 | -6.28E-02 | -1.51E-01 |
| -7.48E-01 | 9.92E-02 | 3.17E-01 | 1.82E-01 | -4.77E-01 | -1.39E-01 | -6.02E-02 | -1.51E-01 |
| -1.99E-01 | 9.63E-02 | 3.29E-01 | 7.99E-02 | -5.28E-01 | -1.43E-01 | -5.76E-02 | -1.52E-01 |
| 3.80E-01 | 8.00E-02 | 3.21E-01 | -2.06E-02 | -5.78E-01 | -1.48E-01 | -5.51E-02 | -1.52E-01 |
| 6.03E-01 | 3.18E-02 | 2.93E-01 | -1.18E-01 | -6.24E-01 | -1.52E-01 | -5.25E-02 | -1.53E-01 |
| 4.77E-01 | -5.73E-02 | 2.44E-01 | -2.12E-01 | -6.67E-01 | -1.56E-01 | -4.99E-02 | -1.53E-01 |
| -2.97E-02 | -1.57E-01 | 1.76E-01 | -3.00E-01 | -7.07E-01 | -1.60E-01 | -4.73E-02 | -1.54E-01 |
| -1.55E-01 | -2.27E-01 | 8.91E-02 | -3.83E-01 | -7.43E-01 | -1.64E-01 | -4.47E-02 | -1.54E-01 |
| -3.43E-01 | -2.26E-01 | -1.73E-02 | -4.58E-01 | -7.75E-01 | -1.67E-01 | -4.21E-02 | -1.55E-01 |
| 1.80E-01 | -1.28E-01 | -1.41E-01 | -5.25E-01 | -8.02E-01 | -1.70E-01 | -3.95E-02 | -1.55E-01 |
| 2.21E-01 | 4.25E-02 | -2.72E-01 | -5.82E-01 | -8.24E-01 | -1.73E-01 | -3.70E-02 | -1.56E-01 |
| -1.72E-01 | 2.23E-01 | -3.97E-01 | -6.29E-01 | -8.42E-01 | -1.75E-01 | -3.44E-02 | -1.56E-01 |
| -8.52E-02 | 2.86E-01 | -5.01E-01 | -6.64E-01 | -8.53E-01 | -1.77E-01 | -3.18E-02 | -1.57E-01 |
| 1.22E-01 | 1.78E-01 | -5.73E-01 | -6.87E-01 | -8.59E-01 | -1.79E-01 | -2.92E-02 | -1.57E-01 |
| 2.68E-02 | -8.39E-02 | -6.10E-01 | -6.95E-01 | -8.58E-01 | -1.80E-01 | -2.66E-02 | -1.58E-01 |
| -1.49E-01 | -3.23E-01 | -6.12E-01 | -6.89E-01 | -8.51E-01 | -1.81E-01 | -2.41E-02 | -1.58E-01 |
| 1.89E-01 | -3.28E-01 | -5.76E-01 | -6.70E-01 | -8.37E-01 | -1.82E-01 | -2.15E-02 | -1.59E-01 |
| -2.35E-01 | -1.97E-02 | -5.14E-01 | -6.38E-01 | -8.18E-01 | -1.82E-01 | -1.89E-02 | -1.59E-01 |
| 9.46E-02 | 3.09E-01 | -4.37E-01 | -5.96E-01 | -7.93E-01 | -1.82E-01 | -1.64E-02 | -1.60E-01 |
| 2.97E-01 | 3.47E-01 | -3.61E-01 | -5.44E-01 | -7.63E-01 | -1.82E-01 | -1.38E-02 | -1.60E-01 |
| -2.91E-01 | -3.30E-02 | -2.93E-01 | -4.85E-01 | -7.28E-01 | -1.81E-01 | -1.13E-02 | -1.61E-01 |
| 2.58E-01 | -3.54E-01 | -2.28E-01 | -4.19E-01 | -6.88E-01 | -1.80E-01 | -8.72E-03 | -1.61E-01 |
| -2.39E-02 | -2.62E-01 | -1.56E-01 | -3.48E-01 | -6.44E-01 | -1.79E-01 | -6.18E-03 | -1.61E-01 |
| -1.68E-01 | 7.52E-02 | -7.31E-02 | -2.73E-01 | -5.96E-01 | -1.78E-01 | -3.64E-03 | -1.62E-01 |
| 1.45E-01 | 3.37E-01 | 2.41E-02 | -1.96E-01 | -5.45E-01 | -1.76E-01 | -1.11E-03 | -1.62E-01 |
| -1.47E-01 | 3.79E-01 | 1.39E-01 | -1.17E-01 | -4.91E-01 | -1.74E-01 | 1.41E-03 | -1.63E-01 |
| 1.69E-01 | 1.95E-01 | 2.70E-01 | -3.98E-02 | -4.34E-01 | -1.72E-01 | 3.93E-03 | -1.63E-01 |
| -2.18E-01 | -9.25E-02 | 4.02E-01 | 3.60E-02 | -3.75E-01 | -1.70E-01 | 6.44E-03 | -1.64E-01 |
| -2.24E-01 | -3.43E-01 | 5.21E-01 | 1.08E-01 | -3.14E-01 | -1.67E-01 | 8.95E-03 | -1.64E-01 |
| 5.74E-02 | -4.54E-01 | 6.16E-01 | 1.76E-01 | -2.51E-01 | -1.64E-01 | 1.14E-02 | -1.65E-01 |
| 2.51E-01 | -4.43E-01 | 6.82E-01 | 2.38E-01 | -1.87E-01 | -1.61E-01 | 1.39E-02 | -1.65E-01 |
| 7.47E-03 | -3.63E-01 | 7.21E-01 | 2.92E-01 | -1.21E-01 | -1.58E-01 | 1.64E-02 | -1.66E-01 |
| -2.34E-01 | -2.54E-01 | 7.37E-01 | 3.38E-01 | -5.55E-02 | -1.54E-01 | 1.89E-02 | -1.66E-01 |
| -4.26E-02 | -1.47E-01 | 7.33E-01 | 3.73E-01 | 1.06E-02 | -1.50E-01 | 2.14E-02 | -1.67E-01 |
| 1.94E-01 | -5.78E-02 | 7.13E-01 | 3.97E-01 | 7.66E-02 | -1.46E-01 | 2.38E-02 | -1.67E-01 |
| 7.69E-02 | 7.73E-03 | 6.79E-01 | 4.11E-01 | 1.42E-01 | -1.42E-01 | 2.63E-02 | -1.67E-01 |
| -5.63E-03 | 6.19E-02 | 6.32E-01 | 4.15E-01 | 2.07E-01 | -1.38E-01 | 2.87E-02 | -1.68E-01 |
| -7.34E-02 | 1.22E-01 | 5.75E-01 | 4.10E-01 | 2.70E-01 | -1.33E-01 | 3.12E-02 | -1.68E-01 |
| -1.46E-01 | 2.06E-01 | 5.08E-01 | 3.97E-01 | 3.32E-01 | -1.29E-01 | 3.36E-02 | -1.69E-01 |
| 1.52E-01 | 3.37E-01 | 4.33E-01 | 3.78E-01 | 3.92E-01 | -1.24E-01 | 3.61E-02 | -1.69E-01 |
| -1.19E-02 | 5.43E-01 | 3.52E-01 | 3.52E-01 | 4.50E-01 | -1.19E-01 | 3.85E-02 | -1.70E-01 |
| -1.69E-01 | 7.55E-01 | 2.67E-01 | 3.20E-01 | 5.05E-01 | -1.13E-01 | 4.09E-02 | -1.70E-01 |
| 1.69E-01 | 8.83E-01 | 1.78E-01 | 2.85E-01 | 5.58E-01 | -1.08E-01 | 4.33E-02 | -1.70E-01 |
| -1.68E-01 | 8.90E-01 | 8.89E-02 | 2.45E-01 | 6.07E-01 | -1.03E-01 | 4.57E-02 | -1.71E-01 |
| -6.27E-02 | 8.61E-01 | 1.37E-03 | 2.03E-01 | 6.53E-01 | -9.71E-02 | 4.81E-02 | -1.71E-01 |
| 4.68E-02 | 8.28E-01 | -8.06E-02 | 1.58E-01 | 6.95E-01 | -9.14E-02 | 5.04E-02 | -1.72E-01 |
| 1.48E-01 | 8.00E-01 | -1.53E-01 | 1.12E-01 | 7.34E-01 | -8.56E-02 | 5.28E-02 | -1.72E-01 |
| 2.27E-01 | 7.85E-01 | -2.14E-01 | 6.54E-02 | 7.69E-01 | -7.97E-02 | 5.51E-02 | -1.73E-01 |
| -9.69E-02 | 7.59E-01 | -2.57E-01 | 1.84E-02 | 8.00E-01 | -7.37E-02 | 5.75E-02 | -1.73E-01 |
| -2.63E-01 | 5.58E-01 | -2.82E-01 | -2.81E-02 | 8.27E-01 | -6.76E-02 | 5.98E-02 | -1.73E-01 |
| 2.50E-01 | 6.05E-02 | -2.82E-01 | -7.34E-02 | 8.49E-01 | -6.14E-02 | 6.22E-02 | -1.74E-01 |
| 2.49E-02 | -5.27E-01 | -2.56E-01 | -1.17E-01 | 8.67E-01 | -5.51E-02 | 6.45E-02 | -1.74E-01 |
| -1.70E-01 | -7.72E-01 | -1.99E-01 | -1.57E-01 | 8.81E-01 | -4.88E-02 | 6.68E-02 | -1.75E-01 |
| 1.55E-01 | -3.59E-01 | -1.14E-01 | -1.94E-01 | 8.90E-01 | -4.24E-02 | 6.91E-02 | -1.75E-01 |
| -1.96E-01 | 3.21E-01 | -2.08E-02 | -2.26E-01 | 8.94E-01 | -3.59E-02 | 7.14E-02 | -1.75E-01 |
| 2.83E-01 | 5.89E-01 | 5.46E-02 | -2.52E-01 | 8.93E-01 | -2.94E-02 | 7.36E-02 | -1.76E-01 |
| -3.68E-01 | 4.15E-01 | 9.22E-02 | -2.72E-01 | 8.87E-01 | -2.29E-02 | 7.59E-02 | -1.76E-01 |
| -8.46E-02 | 1.43E-01 | 9.56E-02 | -2.83E-01 | 8.76E-01 | -1.63E-02 | 7.81E-02 | -1.77E-01 |
| 1.54E-01 | -6.40E-02 | 7.37E-02 | -2.86E-01 | 8.60E-01 | -9.68E-03 | 8.04E-02 | -1.77E-01 |
| 3.17E-01 | -1.83E-01 | 3.79E-02 | -2.81E-01 | 8.38E-01 | -3.04E-03 | 8.26E-02 | -1.77E-01 |
| 3.92E-01 | -2.13E-01 | -3.28E-04 | -2.69E-01 | 8.11E-01 | 3.63E-03 | 8.48E-02 | -1.78E-01 |
| 3.68E-01 | -1.52E-01 | -2.97E-02 | -2.53E-01 | 7.78E-01 | 1.03E-02 | 8.70E-02 | -1.78E-01 |
| -1.49E-01 | -1.67E-02 | -3.98E-02 | -2.33E-01 | 7.41E-01 | 1.70E-02 | 8.92E-02 | -1.79E-01 |
| -2.32E-01 | 6.04E-02 | -2.16E-02 | -2.12E-01 | 6.98E-01 | 2.37E-02 | 9.14E-02 | -1.79E-01 |
| 2.01E-01 | -1.03E-03 | 2.25E-02 | -1.87E-01 | 6.51E-01 | 3.03E-02 | 9.36E-02 | -1.79E-01 |
| -1.87E-01 | -3.24E-02 | 5.15E-02 | -1.56E-01 | 6.00E-01 | 3.70E-02 | 9.57E-02 | -1.80E-01 |
| 1.73E-01 | 4.19E-02 | 2.92E-02 | -1.18E-01 | 5.44E-01 | 4.36E-02 | 9.79E-02 | -1.80E-01 |
| -1.45E-01 | 1.81E-02 | -2.53E-02 | -7.21E-02 | 4.84E-01 | 5.02E-02 | 1.00E-01 | -1.80E-01 |
| 1.77E-02 | -8.79E-02 | -8.02E-02 | -1.93E-02 | 4.21E-01 | 5.68E-02 | 1.02E-01 | -1.81E-01 |
| 8.01E-02 | -1.28E-01 | -1.04E-01 | 4.05E-02 | 3.55E-01 | 6.33E-02 | 1.04E-01 | -1.81E-01 |
| -7.71E-02 | -5.07E-03 | -7.56E-02 | 1.06E-01 | 2.87E-01 | 6.98E-02 | 1.06E-01 | -1.82E-01 |
| 1.03E-01 | 1.44E-01 | -8.93E-03 | 1.74E-01 | 2.17E-01 | 7.62E-02 | 1.08E-01 | -1.82E-01 |
| -7.16E-02 | 2.34E-01 | 7.16E-02 | 2.40E-01 | 1.47E-01 | 8.26E-02 | 1.10E-01 | -1.82E-01 |
| -1.79E-01 | 2.71E-01 | 1.42E-01 | 3.02E-01 | 7.66E-02 | 8.88E-02 | 1.12E-01 | -1.83E-01 |
| -2.19E-01 | 2.85E-01 | 1.78E-01 | 3.54E-01 | 7.20E-03 | 9.50E-02 | 1.15E-01 | -1.83E-01 |
| 2.20E-01 | 2.84E-01 | 1.61E-01 | 3.95E-01 | -6.09E-02 | 1.01E-01 | 1.17E-01 | -1.83E-01 |
| 2.63E-02 | 1.65E-01 | 1.01E-01 | 4.24E-01 | -1.27E-01 | 1.07E-01 | 1.19E-01 | -1.84E-01 |
| -5.28E-02 | -3.29E-02 | 1.53E-02 | 4.42E-01 | -1.92E-01 | 1.13E-01 | 1.21E-01 | -1.84E-01 |
| -1.20E-01 | -2.29E-01 | -7.72E-02 | 4.50E-01 | -2.54E-01 | 1.19E-01 | 1.23E-01 | -1.84E-01 |
| 1.03E-01 | -3.19E-01 | -1.57E-01 | 4.50E-01 | -3.14E-01 | 1.25E-01 | 1.24E-01 | -1.85E-01 |
| 6.78E-02 | -1.74E-01 | -2.09E-01 | 4.42E-01 | -3.71E-01 | 1.30E-01 | 1.26E-01 | -1.85E-01 |
| -1.23E-01 | 9.63E-02 | -2.25E-01 | 4.27E-01 | -4.26E-01 | 1.36E-01 | 1.28E-01 | -1.85E-01 |
| 1.34E-01 | 2.86E-01 | -2.04E-01 | 4.07E-01 | -4.79E-01 | 1.41E-01 | 1.30E-01 | -1.86E-01 |
| -1.35E-01 | 1.62E-01 | -1.46E-01 | 3.82E-01 | -5.28E-01 | 1.46E-01 | 1.32E-01 | -1.86E-01 |
| 1.31E-01 | -1.13E-01 | -6.54E-02 | 3.51E-01 | -5.75E-01 | 1.51E-01 | 1.34E-01 | -1.86E-01 |
| -1.45E-01 | -2.51E-01 | 1.66E-02 | 3.18E-01 | -6.19E-01 | 1.56E-01 | 1.36E-01 | -1.87E-01 |
| -1.53E-01 | -2.38E-01 | 8.35E-02 | 2.81E-01 | -6.60E-01 | 1.61E-01 | 1.38E-01 | -1.87E-01 |
| 1.84E-01 | -1.51E-01 | 1.33E-01 | 2.42E-01 | -6.98E-01 | 1.65E-01 | 1.40E-01 | -1.87E-01 |
| 1.25E-01 | -5.48E-02 | 1.66E-01 | 2.01E-01 | -7.33E-01 | 1.70E-01 | 1.41E-01 | -1.88E-01 |
| -3.13E-01 | 3.39E-02 | 1.84E-01 | 1.56E-01 | -7.64E-01 | 1.74E-01 | 1.43E-01 | -1.88E-01 |
| -3.32E-01 | 1.20E-01 | 1.88E-01 | 1.08E-01 | -7.93E-01 | 1.78E-01 | 1.45E-01 | -1.88E-01 |
| -3.35E-01 | 2.02E-01 | 1.80E-01 | 5.64E-02 | -8.18E-01 | 1.82E-01 | 1.47E-01 | -1.89E-01 |
| -3.14E-01 | 2.70E-01 | 1.62E-01 | 1.47E-03 | -8.39E-01 | 1.85E-01 | 1.48E-01 | -1.89E-01 |
| 1.66E-01 | 2.90E-01 | 1.36E-01 | -5.66E-02 | -8.57E-01 | 1.88E-01 | 1.50E-01 | -1.89E-01 |
| 3.37E-01 | 2.18E-01 | 1.08E-01 | -1.17E-01 | -8.72E-01 | 1.92E-01 | 1.52E-01 | -1.90E-01 |
| 2.16E-01 | 3.43E-02 | 7.94E-02 | -1.81E-01 | -8.82E-01 | 1.95E-01 | 1.54E-01 | -1.90E-01 |
| -2.61E-01 | -1.95E-01 | 4.96E-02 | -2.46E-01 | -8.89E-01 | 1.97E-01 | 1.55E-01 | -1.90E-01 |
| 1.94E-02 | -3.79E-01 | 1.93E-02 | -3.13E-01 | -8.92E-01 | 2.00E-01 | 1.57E-01 | -1.90E-01 |
| 1.53E-01 | -4.18E-01 | -1.13E-02 | -3.81E-01 | -8.92E-01 | 2.02E-01 | 1.59E-01 | -1.91E-01 |
| 1.14E-01 | -2.89E-01 | -4.16E-02 | -4.49E-01 | -8.87E-01 | 2.04E-01 | 1.60E-01 | -1.91E-01 |
| -7.12E-02 | -1.97E-02 | -6.82E-02 | -5.18E-01 | -8.78E-01 | 2.06E-01 | 1.62E-01 | -1.91E-01 |
| 6.33E-02 | 3.20E-01 | -8.74E-02 | -5.87E-01 | -8.65E-01 | 2.07E-01 | 1.63E-01 | -1.92E-01 |
| -8.45E-02 | 5.24E-01 | -9.54E-02 | -6.55E-01 | -8.47E-01 | 2.08E-01 | 1.65E-01 | -1.92E-01 |
| 1.27E-01 | 3.49E-01 | -8.92E-02 | -7.21E-01 | -8.26E-01 | 2.09E-01 | 1.67E-01 | -1.92E-01 |
| -1.72E-01 | -1.39E-01 | -7.04E-02 | -7.85E-01 | -8.00E-01 | 2.10E-01 | 1.68E-01 | -1.93E-01 |
| -1.70E-01 | -5.44E-01 | -4.13E-02 | -8.46E-01 | -7.69E-01 | 2.11E-01 | 1.70E-01 | -1.93E-01 |
| 2.33E-01 | -5.64E-01 | -3.57E-03 | -9.02E-01 | -7.34E-01 | 2.11E-01 | 1.71E-01 | -1.93E-01 |
| -1.78E-01 | -1.85E-01 | 3.85E-02 | -9.52E-01 | -6.95E-01 | 2.12E-01 | 1.73E-01 | -1.93E-01 |
| -2.54E-01 | 2.57E-01 | 7.23E-02 | -9.96E-01 | -6.50E-01 | 2.12E-01 | 1.74E-01 | -1.94E-01 |
| -1.47E-01 | 5.25E-01 | 8.34E-02 | -1.03E+00 | -6.02E-01 | 2.11E-01 | 1.75E-01 | -1.94E-01 |
| 2.57E-01 | 5.14E-01 | 6.21E-02 | -1.05E+00 | -5.49E-01 | 2.11E-01 | 1.77E-01 | -1.94E-01 |
| 1.75E-01 | 1.91E-01 | 1.82E-02 | -1.06E+00 | -4.92E-01 | 2.11E-01 | 1.78E-01 | -1.94E-01 |
| -2.47E-01 | -2.04E-01 | -3.32E-02 | -1.06E+00 | -4.31E-01 | 2.10E-01 | 1.80E-01 | -1.95E-01 |
| -7.61E-02 | -4.13E-01 | -7.72E-02 | -1.04E+00 | -3.67E-01 | 2.09E-01 | 1.81E-01 | -1.95E-01 |
| 2.10E-01 | -3.73E-01 | -1.01E-01 | -1.01E+00 | -3.01E-01 | 2.08E-01 | 1.82E-01 | -1.95E-01 |
| -1.81E-01 | -9.94E-02 | -1.04E-01 | -9.57E-01 | -2.32E-01 | 2.07E-01 | 1.84E-01 | -1.95E-01 |
| 1.56E-01 | 2.09E-01 | -8.45E-02 | -8.88E-01 | -1.62E-01 | 2.06E-01 | 1.85E-01 | -1.96E-01 |
| -1.51E-01 | 3.16E-01 | -4.10E-02 | -8.02E-01 | -9.04E-02 | 2.04E-01 | 1.86E-01 | -1.96E-01 |
| 1.89E-01 | 1.41E-01 | 2.41E-02 | -7.02E-01 | -1.80E-02 | 2.02E-01 | 1.87E-01 | -1.96E-01 |
| 2.10E-01 | -1.30E-01 | 8.85E-02 | -5.89E-01 | 5.48E-02 | 2.01E-01 | 1.89E-01 | -1.96E-01 |
| -2.56E-01 | -2.98E-01 | 1.24E-01 | -4.64E-01 | 1.27E-01 | 1.99E-01 | 1.90E-01 | -1.97E-01 |
| -1.02E-01 | -2.45E-01 | 1.15E-01 | -3.30E-01 | 1.99E-01 | 1.97E-01 | 1.91E-01 | -1.97E-01 |
| -6.86E-02 | -4.48E-02 | 7.06E-02 | -1.87E-01 | 2.70E-01 | 1.94E-01 | 1.92E-01 | -1.97E-01 |
| 3.51E-01 | 1.86E-01 | 7.47E-03 | -3.87E-02 | 3.40E-01 | 1.92E-01 | 1.93E-01 | -1.97E-01 |
| -3.50E-01 | 3.31E-01 | -5.74E-02 | 1.14E-01 | 4.07E-01 | 1.90E-01 | 1.94E-01 | -1.98E-01 |
| 3.34E-01 | 2.84E-01 | -1.08E-01 | 2.69E-01 | 4.72E-01 | 1.87E-01 | 1.95E-01 | -1.98E-01 |
| 1.33E-02 | 1.30E-02 | -1.33E-01 | 4.23E-01 | 5.34E-01 | 1.84E-01 | 1.97E-01 | -1.98E-01 |
| -3.06E-01 | -2.88E-01 | -1.22E-01 | 5.73E-01 | 5.93E-01 | 1.82E-01 | 1.98E-01 | -1.98E-01 |
| 3.10E-01 | -3.50E-01 | -6.82E-02 | 7.17E-01 | 6.48E-01 | 1.79E-01 | 1.99E-01 | -1.99E-01 |
| -3.20E-01 | 7.41E-03 | 2.11E-02 | 8.52E-01 | 6.98E-01 | 1.76E-01 | 2.00E-01 | -1.99E-01 |
| 3.17E-01 | 3.30E-01 | 1.02E-01 | 9.75E-01 | 7.44E-01 | 1.73E-01 | 2.01E-01 | -1.99E-01 |
| 2.99E-01 | 1.73E-01 | 1.30E-01 | 1.08E+00 | 7.85E-01 | 1.70E-01 | 2.02E-01 | -1.99E-01 |
| -2.57E-01 | -1.68E-01 | 1.00E-01 | 1.17E+00 | 8.19E-01 | 1.67E-01 | 2.03E-01 | -1.99E-01 |
| 2.22E-01 | -2.67E-01 | 2.55E-02 | 1.24E+00 | 8.48E-01 | 1.63E-01 | 2.04E-01 | -2.00E-01 |
| 7.93E-03 | -2.45E-02 | -7.05E-02 | 1.29E+00 | 8.70E-01 | 1.60E-01 | 2.05E-01 | -2.00E-01 |
| -2.07E-01 | 2.19E-01 | -1.34E-01 | 1.31E+00 | 8.84E-01 | 1.57E-01 | 2.05E-01 | -2.00E-01 |
| 2.44E-01 | 1.57E-01 | -1.18E-01 | 1.31E+00 | 8.92E-01 | 1.53E-01 | 2.06E-01 | -2.00E-01 |
| -7.33E-03 | -3.23E-02 | -4.41E-02 | 1.28E+00 | 8.91E-01 | 1.50E-01 | 2.07E-01 | -2.00E-01 |
| -3.21E-01 | -1.49E-01 | 5.36E-02 | 1.22E+00 | 8.84E-01 | 1.46E-01 | 2.08E-01 | -2.01E-01 |
| -3.84E-01 | -6.79E-02 | 1.37E-01 | 1.13E+00 | 8.69E-01 | 1.42E-01 | 2.09E-01 | -2.01E-01 |
| 3.63E-01 | 9.92E-02 | 1.59E-01 | 1.03E+00 | 8.48E-01 | 1.39E-01 | 2.10E-01 | -2.01E-01 |
| 1.97E-01 | 9.28E-02 | 8.48E-02 | 9.00E-01 | 8.21E-01 | 1.35E-01 | 2.11E-01 | -2.01E-01 |
| -2.06E-01 | -7.45E-03 | -4.01E-02 | 7.59E-01 | 7.89E-01 | 1.31E-01 | 2.11E-01 | -2.01E-01 |
| 1.28E-01 | -3.70E-02 | -1.52E-01 | 6.08E-01 | 7.51E-01 | 1.27E-01 | 2.12E-01 | -2.02E-01 |
| -9.58E-02 | 2.90E-02 | -1.91E-01 | 4.49E-01 | 7.08E-01 | 1.23E-01 | 2.13E-01 | -2.02E-01 |
| 1.17E-01 | -3.21E-02 | -1.29E-01 | 2.85E-01 | 6.61E-01 | 1.19E-01 | 2.14E-01 | -2.02E-01 |
| -1.71E-01 | -4.05E-02 | -1.50E-02 | 1.21E-01 | 6.09E-01 | 1.15E-01 | 2.14E-01 | -2.02E-01 |
| 2.25E-01 | 6.60E-02 | 1.05E-01 | -4.10E-02 | 5.55E-01 | 1.11E-01 | 2.15E-01 | -2.02E-01 |
| -6.41E-02 | 8.05E-02 | 1.95E-01 | -1.97E-01 | 4.97E-01 | 1.07E-01 | 2.16E-01 | -2.02E-01 |
| -2.18E-01 | 1.34E-02 | 2.29E-01 | -3.48E-01 | 4.36E-01 | 1.03E-01 | 2.17E-01 | -2.03E-01 |
| -2.98E-01 | -8.47E-02 | 2.15E-01 | -4.91E-01 | 3.73E-01 | 9.93E-02 | 2.17E-01 | -2.03E-01 |
| 3.58E-02 | -1.70E-01 | 1.70E-01 | -6.26E-01 | 3.07E-01 | 9.52E-02 | 2.18E-01 | -2.03E-01 |
| 3.12E-01 | -1.90E-01 | 1.10E-01 | -7.51E-01 | 2.40E-01 | 9.10E-02 | 2.18E-01 | -2.03E-01 |
| -3.23E-01 | -1.12E-01 | 4.71E-02 | -8.64E-01 | 1.72E-01 | 8.69E-02 | 2.19E-01 | -2.03E-01 |
| 1.85E-01 | 1.37E-02 | -1.36E-02 | -9.62E-01 | 1.04E-01 | 8.27E-02 | 2.20E-01 | -2.03E-01 |
| 2.65E-01 | 1.47E-01 | -7.10E-02 | -1.05E+00 | 3.45E-02 | 7.84E-02 | 2.20E-01 | -2.04E-01 |
| 3.49E-01 | 2.53E-01 | -1.23E-01 | -1.11E+00 | -3.46E-02 | 7.42E-02 | 2.21E-01 | -2.04E-01 |
| -3.33E-01 | 2.94E-01 | -1.69E-01 | -1.16E+00 | -1.03E-01 | 6.99E-02 | 2.21E-01 | -2.04E-01 |
| 3.00E-01 | 1.97E-01 | -2.06E-01 | -1.18E+00 | -1.71E-01 | 6.57E-02 | 2.22E-01 | -2.04E-01 |
| 2.65E-01 | -7.23E-02 | -2.34E-01 | -1.18E+00 | -2.38E-01 | 6.14E-02 | 2.22E-01 | -2.04E-01 |
| -2.24E-01 | -3.29E-01 | -2.48E-01 | -1.15E+00 | -3.02E-01 | 5.71E-02 | 2.23E-01 | -2.04E-01 |
| 1.97E-01 | -3.33E-01 | -2.46E-01 | -1.11E+00 | -3.65E-01 | 5.28E-02 | 2.23E-01 | -2.04E-01 |
| -1.44E-01 | -2.24E-02 | -2.24E-01 | -1.03E+00 | -4.26E-01 | 4.84E-02 | 2.24E-01 | -2.05E-01 |
| -1.43E-01 | 3.04E-01 | -1.81E-01 | -9.40E-01 | -4.84E-01 | 4.41E-02 | 2.24E-01 | -2.05E-01 |
| 1.01E-01 | 3.49E-01 | -1.18E-01 | -8.29E-01 | -5.39E-01 | 3.98E-02 | 2.25E-01 | -2.05E-01 |
| -7.18E-02 | -2.86E-02 | -3.80E-02 | -7.05E-01 | -5.92E-01 | 3.55E-02 | 2.25E-01 | -2.05E-01 |
| 9.38E-02 | -3.58E-01 | 4.33E-02 | -5.69E-01 | -6.41E-01 | 3.11E-02 | 2.26E-01 | -2.05E-01 |
| -1.75E-01 | -2.51E-01 | 1.11E-01 | -4.25E-01 | -6.87E-01 | 2.68E-02 | 2.26E-01 | -2.05E-01 |
| 2.83E-01 | -5.66E-02 | 1.60E-01 | -2.76E-01 | -7.29E-01 | 2.25E-02 | 2.26E-01 | -2.05E-01 |
| -2.93E-01 | -1.87E-02 | 1.88E-01 | -1.25E-01 | -7.67E-01 | 1.82E-02 | 2.27E-01 | -2.05E-01 |
| -4.32E-01 | 6.08E-03 | 1.91E-01 | 2.45E-02 | -8.02E-01 | 1.39E-02 | 2.27E-01 | -2.05E-01 |
| -2.84E-01 | 1.73E-01 | 1.67E-01 | 1.70E-01 | -8.32E-01 | 9.55E-03 | 2.27E-01 | -2.06E-01 |
| -1.13E-01 | 3.49E-01 | 1.14E-01 | 3.08E-01 | -8.58E-01 | 5.26E-03 | 2.28E-01 | -2.06E-01 |
| 2.92E-01 | 3.25E-01 | 3.30E-02 | 4.36E-01 | -8.80E-01 | 9.84E-04 | 2.28E-01 | -2.06E-01 |
| -1.81E-01 | -1.27E-02 | -5.44E-02 | 5.50E-01 | -8.96E-01 | -3.28E-03 | 2.28E-01 | -2.06E-01 |
| 9.17E-02 | -3.00E-01 | -1.22E-01 | 6.49E-01 | -9.08E-01 | -7.52E-03 | 2.29E-01 | -2.06E-01 |
| -6.73E-02 | -1.82E-01 | -1.50E-01 | 7.28E-01 | -9.14E-01 | -1.17E-02 | 2.29E-01 | -2.06E-01 |
| 1.20E-02 | 7.45E-02 | -1.39E-01 | 7.88E-01 | -9.15E-01 | -1.59E-02 | 2.29E-01 | -2.06E-01 |
| 1.79E-01 | 2.25E-01 | -9.64E-02 | 8.29E-01 | -9.10E-01 | -2.01E-02 | 2.29E-01 | -2.06E-01 |
| -2.43E-01 | 1.50E-01 | -3.14E-02 | 8.52E-01 | -8.99E-01 | -2.43E-02 | 2.30E-01 | -2.06E-01 |
| -1.95E-01 | 1.08E-02 | 4.03E-02 | 8.58E-01 | -8.83E-01 | -2.84E-02 | 2.30E-01 | -2.06E-01 |
| -1.63E-01 | -9.03E-02 | 9.97E-02 | 8.49E-01 | -8.60E-01 | -3.25E-02 | 2.30E-01 | -2.06E-01 |
| -1.52E-01 | -1.31E-01 | 1.27E-01 | 8.27E-01 | -8.31E-01 | -3.66E-02 | 2.30E-01 | -2.07E-01 |
| 2.45E-01 | -1.04E-01 | 1.10E-01 | 7.92E-01 | -7.96E-01 | -4.07E-02 | 2.31E-01 | -2.07E-01 |
| -2.05E-01 | 1.88E-03 | 5.99E-02 | 7.48E-01 | -7.56E-01 | -4.47E-02 | 2.31E-01 | -2.07E-01 |
| 1.70E-01 | 1.02E-01 | -2.69E-03 | 6.95E-01 | -7.11E-01 | -4.87E-02 | 2.31E-01 | -2.07E-01 |
| -1.53E-01 | 9.41E-02 | -6.05E-02 | 6.37E-01 | -6.62E-01 | -5.27E-02 | 2.31E-01 | -2.07E-01 |
| 7.80E-04 | -2.38E-03 | -1.04E-01 | 5.74E-01 | -6.09E-01 | -5.67E-02 | 2.31E-01 | -2.07E-01 |
| 1.41E-01 | -1.08E-01 | -1.26E-01 | 5.09E-01 | -5.52E-01 | -6.06E-02 | 2.31E-01 | -2.07E-01 |
| 1.73E-01 | -1.37E-01 | -1.19E-01 | 4.43E-01 | -4.93E-01 | -6.45E-02 | 2.31E-01 | -2.07E-01 |
| 3.86E-02 | -3.46E-02 | -7.84E-02 | 3.77E-01 | -4.31E-01 | -6.84E-02 | 2.31E-01 | -2.07E-01 |
| -1.69E-01 | 1.17E-01 | -1.78E-02 | 3.12E-01 | -3.68E-01 | -7.23E-02 | 2.32E-01 | -2.07E-01 |
| 8.62E-02 | 2.02E-01 | 4.59E-02 | 2.49E-01 | -3.02E-01 | -7.61E-02 | 2.32E-01 | -2.07E-01 |
| 1.17E-01 | 1.19E-01 | 9.76E-02 | 1.88E-01 | -2.36E-01 | -7.99E-02 | 2.32E-01 | -2.07E-01 |
| -8.50E-02 | -1.18E-01 | 1.29E-01 | 1.30E-01 | -1.69E-01 | -8.37E-02 | 2.32E-01 | -2.07E-01 |
| 6.36E-02 | -2.80E-01 | 1.34E-01 | 7.48E-02 | -1.03E-01 | -8.75E-02 | 2.32E-01 | -2.07E-01 |
| -5.98E-02 | -1.44E-01 | 1.10E-01 | 2.39E-02 | -3.57E-02 | -9.12E-02 | 2.32E-01 | -2.07E-01 |
| 6.97E-02 | 1.58E-01 | 6.46E-02 | -2.32E-02 | 3.06E-02 | -9.49E-02 | 2.32E-01 | -2.07E-01 |
| -8.64E-02 | 3.49E-01 | 1.07E-02 | -6.65E-02 | 9.62E-02 | -9.86E-02 | 2.32E-01 | -2.07E-01 |
| -4.91E-02 | 3.43E-01 | -4.12E-02 | -1.06E-01 | 1.61E-01 | -1.02E-01 | 2.32E-01 | -2.07E-01 |
| 1.37E-01 | 1.77E-01 | -8.56E-02 | -1.42E-01 | 2.24E-01 | -1.06E-01 | 2.32E-01 | -2.07E-01 |
| -3.45E-02 | -4.56E-02 | -1.18E-01 | -1.75E-01 | 2.86E-01 | -1.09E-01 | 2.32E-01 | -2.07E-01 |
| -2.29E-01 | -2.64E-01 | -1.34E-01 | -2.05E-01 | 3.46E-01 | -1.13E-01 | 2.32E-01 | -2.07E-01 |
| 2.91E-01 | -4.13E-01 | -1.30E-01 | -2.33E-01 | 4.05E-01 | -1.17E-01 | 2.32E-01 | -2.07E-01 |
| -1.79E-01 | -4.01E-01 | -1.02E-01 | -2.58E-01 | 4.61E-01 | -1.20E-01 | 2.32E-01 | -2.07E-01 |
| -4.21E-01 | -2.31E-01 | -5.72E-02 | -2.81E-01 | 5.15E-01 | -1.24E-01 | 2.32E-01 | -2.07E-01 |
| 2.95E-02 | 4.31E-02 | -4.39E-03 | -3.02E-01 | 5.66E-01 | -1.27E-01 | 2.32E-01 | -2.07E-01 |
| 5.07E-01 | 2.92E-01 | 4.81E-02 | -3.22E-01 | 6.15E-01 | -1.31E-01 | 2.32E-01 | -2.07E-01 |
| -4.75E-01 | 4.01E-01 | 9.17E-02 | -3.40E-01 | 6.61E-01 | -1.34E-01 | 2.31E-01 | -2.07E-01 |
| -5.17E-01 | 3.93E-01 | 1.18E-01 | -3.56E-01 | 7.05E-01 | -1.37E-01 | 2.31E-01 | -2.07E-01 |
| -4.67E-01 | 3.15E-01 | 1.24E-01 | -3.72E-01 | 7.45E-01 | -1.41E-01 | 2.31E-01 | -2.07E-01 |
| -3.43E-01 | 1.83E-01 | 1.13E-01 | -3.86E-01 | 7.82E-01 | -1.44E-01 | 2.31E-01 | -2.07E-01 |
| -1.84E-01 | 3.24E-02 | 8.75E-02 | -3.99E-01 | 8.16E-01 | -1.47E-01 | 2.31E-01 | -2.07E-01 |
| 3.65E-01 | -9.73E-02 | 5.33E-02 | -4.09E-01 | 8.47E-01 | -1.51E-01 | 2.31E-01 | -2.07E-01 |
| 6.53E-02 | -1.77E-01 | 1.40E-02 | -4.15E-01 | 8.73E-01 | -1.54E-01 | 2.31E-01 | -2.07E-01 |
| -2.60E-01 | -2.31E-01 | -2.63E-02 | -4.18E-01 | 8.96E-01 | -1.57E-01 | 2.31E-01 | -2.07E-01 |
| 2.12E-01 | -2.82E-01 | -6.34E-02 | -4.16E-01 | 9.16E-01 | -1.60E-01 | 2.30E-01 | -2.07E-01 |
| -1.68E-01 | -2.93E-01 | -9.33E-02 | -4.09E-01 | 9.31E-01 | -1.63E-01 | 2.30E-01 | -2.07E-01 |
| 1.28E-01 | -1.91E-01 | -1.12E-01 | -3.95E-01 | 9.43E-01 | -1.67E-01 | 2.30E-01 | -2.07E-01 |
| -9.33E-02 | 1.10E-02 | -1.16E-01 | -3.76E-01 | 9.51E-01 | -1.70E-01 | 2.30E-01 | -2.07E-01 |
| 6.96E-02 | 2.11E-01 | -1.04E-01 | -3.50E-01 | 9.55E-01 | -1.73E-01 | 2.30E-01 | -2.07E-01 |
| -6.36E-02 | 2.82E-01 | -7.06E-02 | -3.19E-01 | 9.55E-01 | -1.76E-01 | 2.29E-01 | -2.07E-01 |
| -2.49E-02 | 1.60E-01 | -1.78E-02 | -2.81E-01 | 9.52E-01 | -1.79E-01 | 2.29E-01 | -2.07E-01 |
| 1.12E-01 | -6.89E-02 | 4.12E-02 | -2.38E-01 | 9.45E-01 | -1.82E-01 | 2.29E-01 | -2.07E-01 |
| -1.61E-01 | -2.81E-01 | 8.98E-02 | -1.90E-01 | 9.35E-01 | -1.85E-01 | 2.29E-01 | -2.07E-01 |
| 2.19E-01 | -3.18E-01 | 1.12E-01 | -1.36E-01 | 9.21E-01 | -1.88E-01 | 2.29E-01 | -2.07E-01 |
| -2.00E-02 | -1.04E-01 | 9.77E-02 | -7.68E-02 | 9.03E-01 | -1.90E-01 | 2.28E-01 | -2.07E-01 |
| -3.19E-01 | 1.98E-01 | 5.67E-02 | -1.44E-02 | 8.82E-01 | -1.93E-01 | 2.28E-01 | -2.07E-01 |
| 3.45E-01 | 3.56E-01 | 2.49E-03 | 4.94E-02 | 8.58E-01 | -1.96E-01 | 2.28E-01 | -2.07E-01 |
| -2.69E-01 | 1.87E-01 | -5.10E-02 | 1.12E-01 | 8.30E-01 | -1.99E-01 | 2.28E-01 | -2.07E-01 |
| -3.29E-01 | -1.43E-01 | -8.90E-02 | 1.73E-01 | 7.99E-01 | -2.02E-01 | 2.27E-01 | -2.07E-01 |
| 2.91E-01 | -3.72E-01 | -9.64E-02 | 2.28E-01 | 7.64E-01 | -2.04E-01 | 2.27E-01 | -2.07E-01 |
| -2.43E-01 | -2.79E-01 | -6.55E-02 | 2.78E-01 | 7.26E-01 | -2.07E-01 | 2.27E-01 | -2.07E-01 |
| 1.96E-01 | 3.35E-02 | -1.18E-02 | 3.21E-01 | 6.84E-01 | -2.10E-01 | 2.26E-01 | -2.06E-01 |
| -9.74E-02 | 2.86E-01 | 4.32E-02 | 3.55E-01 | 6.40E-01 | -2.12E-01 | 2.26E-01 | -2.06E-01 |
| -1.37E-01 | 3.19E-01 | 7.80E-02 | 3.77E-01 | 5.92E-01 | -2.15E-01 | 2.26E-01 | -2.06E-01 |
| 1.33E-01 | 9.36E-02 | 7.74E-02 | 3.85E-01 | 5.42E-01 | -2.17E-01 | 2.26E-01 | -2.06E-01 |
| 6.36E-02 | -1.50E-01 | 5.06E-02 | 3.78E-01 | 4.89E-01 | -2.20E-01 | 2.25E-01 | -2.06E-01 |
| -1.38E-01 | -2.32E-01 | 1.09E-02 | 3.58E-01 | 4.34E-01 | -2.22E-01 | 2.25E-01 | -2.06E-01 |
| -1.64E-01 | -7.36E-02 | -2.84E-02 | 3.24E-01 | 3.77E-01 | -2.24E-01 | 2.25E-01 | -2.06E-01 |
| 1.57E-01 | 1.39E-01 | -5.44E-02 | 2.79E-01 | 3.19E-01 | -2.27E-01 | 2.24E-01 | -2.06E-01 |
| -1.36E-01 | 1.48E-01 | -5.49E-02 | 2.24E-01 | 2.59E-01 | -2.29E-01 | 2.24E-01 | -2.06E-01 |
| 1.15E-01 | -4.44E-03 | -2.58E-02 | 1.60E-01 | 1.98E-01 | -2.31E-01 | 2.24E-01 | -2.06E-01 |
| -1.07E-01 | -9.15E-02 | 1.52E-02 | 9.01E-02 | 1.36E-01 | -2.33E-01 | 2.23E-01 | -2.06E-01 |
| 1.85E-02 | -1.12E-01 | 4.66E-02 | 1.75E-02 | 7.39E-02 | -2.35E-01 | 2.23E-01 | -2.05E-01 |
| 1.34E-01 | -1.01E-01 | 5.78E-02 | -5.50E-02 | 1.15E-02 | -2.37E-01 | 2.23E-01 | -2.05E-01 |
| -1.51E-01 | -7.57E-02 | 5.03E-02 | -1.25E-01 | -5.09E-02 | -2.39E-01 | 2.22E-01 | -2.05E-01 |
| -7.73E-02 | 2.72E-03 | 2.87E-02 | -1.92E-01 | -1.13E-01 | -2.41E-01 | 2.22E-01 | -2.05E-01 |
| -2.70E-02 | 1.08E-01 | -1.90E-03 | -2.54E-01 | -1.74E-01 | -2.43E-01 | 2.22E-01 | -2.05E-01 |
| 4.07E-02 | 1.94E-01 | -3.68E-02 | -3.09E-01 | -2.35E-01 | -2.44E-01 | 2.21E-01 | -2.05E-01 |
| 1.67E-01 | 2.11E-01 | -7.07E-02 | -3.58E-01 | -2.95E-01 | -2.46E-01 | 2.21E-01 | -2.05E-01 |
| -2.23E-02 | 1.26E-01 | -9.82E-02 | -3.98E-01 | -3.53E-01 | -2.47E-01 | 2.20E-01 | -2.05E-01 |
| -1.47E-01 | -4.67E-02 | -1.15E-01 | -4.28E-01 | -4.09E-01 | -2.49E-01 | 2.20E-01 | -2.05E-01 |
| 1.36E-01 | -2.51E-01 | -1.19E-01 | -4.47E-01 | -4.63E-01 | -2.50E-01 | 2.20E-01 | -2.04E-01 |
| -1.33E-01 | -3.37E-01 | -1.04E-01 | -4.55E-01 | -5.15E-01 | -2.52E-01 | 2.19E-01 | -2.04E-01 |
| 1.40E-01 | -1.95E-01 | -6.84E-02 | -4.52E-01 | -5.65E-01 | -2.53E-01 | 2.19E-01 | -2.04E-01 |
| -1.58E-01 | 8.67E-02 | -1.81E-02 | -4.38E-01 | -6.11E-01 | -2.54E-01 | 2.19E-01 | -2.04E-01 |
| -2.44E-02 | 3.19E-01 | 3.95E-02 | -4.14E-01 | -6.55E-01 | -2.55E-01 | 2.18E-01 | -2.04E-01 |
| 2.12E-01 | 4.37E-01 | 9.71E-02 | -3.82E-01 | -6.97E-01 | -2.56E-01 | 2.18E-01 | -2.04E-01 |
| -2.37E-01 | 4.34E-01 | 1.48E-01 | -3.43E-01 | -7.35E-01 | -2.57E-01 | 2.17E-01 | -2.04E-01 |
| -2.23E-01 | 3.71E-01 | 1.89E-01 | -2.98E-01 | -7.70E-01 | -2.58E-01 | 2.17E-01 | -2.03E-01 |
| -1.88E-01 | 2.87E-01 | 2.20E-01 | -2.48E-01 | -8.02E-01 | -2.59E-01 | 2.17E-01 | -2.03E-01 |
| -1.39E-01 | 1.91E-01 | 2.43E-01 | -1.94E-01 | -8.31E-01 | -2.60E-01 | 2.16E-01 | -2.03E-01 |
| -7.89E-02 | 8.60E-02 | 2.59E-01 | -1.38E-01 | -8.58E-01 | -2.61E-01 | 2.16E-01 | -2.03E-01 |
| -1.17E-02 | -2.55E-02 | 2.69E-01 | -7.88E-02 | -8.81E-01 | -2.61E-01 | 2.15E-01 | -2.03E-01 |
| 5.98E-02 | -1.40E-01 | 2.75E-01 | -1.93E-02 | -9.02E-01 | -2.62E-01 | 2.15E-01 | -2.03E-01 |
| 1.32E-01 | -2.54E-01 | 2.76E-01 | 4.01E-02 | -9.21E-01 | -2.62E-01 | 2.14E-01 | -2.03E-01 |
| 1.98E-01 | -3.63E-01 | 2.76E-01 | 9.84E-02 | -9.36E-01 | -2.62E-01 | 2.14E-01 | -2.02E-01 |
| -1.68E-01 | -4.39E-01 | 2.74E-01 | 1.55E-01 | -9.49E-01 | -2.62E-01 | 2.14E-01 | -2.02E-01 |
| 1.41E-01 | -3.86E-01 | 2.70E-01 | 2.10E-01 | -9.60E-01 | -2.62E-01 | 2.13E-01 | -2.02E-01 |
| -1.28E-01 | -1.48E-01 | 2.58E-01 | 2.61E-01 | -9.68E-01 | -2.62E-01 | 2.13E-01 | -2.02E-01 |
| -4.84E-02 | 1.58E-01 | 2.32E-01 | 3.10E-01 | -9.74E-01 | -2.62E-01 | 2.12E-01 | -2.02E-01 |
| 1.51E-01 | 3.67E-01 | 1.85E-01 | 3.55E-01 | -9.78E-01 | -2.62E-01 | 2.12E-01 | -2.02E-01 |
| -1.76E-01 | 3.23E-01 | 1.14E-01 | 3.95E-01 | -9.80E-01 | -2.62E-01 | 2.11E-01 | -2.01E-01 |
| 2.00E-01 | 1.99E-03 | 2.28E-02 | 4.31E-01 | -9.79E-01 | -2.61E-01 | 2.11E-01 | -2.01E-01 |
| -2.17E-01 | -3.16E-01 | -8.04E-02 | 4.62E-01 | -9.76E-01 | -2.61E-01 | 2.11E-01 | -2.01E-01 |
| 2.29E-01 | -2.85E-01 | -1.86E-01 | 4.87E-01 | -9.71E-01 | -2.60E-01 | 2.10E-01 | -2.01E-01 |
| -2.11E-02 | 3.10E-02 | -2.78E-01 | 5.06E-01 | -9.64E-01 | -2.60E-01 | 2.10E-01 | -2.01E-01 |
| -2.49E-01 | 2.96E-01 | -3.36E-01 | 5.17E-01 | -9.55E-01 | -2.59E-01 | 2.09E-01 | -2.00E-01 |
| 2.55E-01 | 1.91E-01 | -3.49E-01 | 5.22E-01 | -9.45E-01 | -2.58E-01 | 2.09E-01 | -2.00E-01 |
| -2.59E-01 | -1.38E-01 | -3.20E-01 | 5.18E-01 | -9.32E-01 | -2.57E-01 | 2.08E-01 | -2.00E-01 |
